# Supplementary material for: Comprehensive Metabolic Profiling of Euphorbiasteroid in Rats by Integrating UPLC-Q/TOF-MS and NMR as Well as Microbial Biotransformation
Source: MDPI journal article supplement (doi:10.3390/metabo12090830), 2022-09-02
Supplement: s1 [file s1]

# Supplementary Materials

**Comprehensive metabolic profiling of euphorbiasteroid in rats by integrating  
UPLC-Q/TOF-MS and NMR as well as microbial biotransformation**

**Sijia Xiao<sup>1,†</sup>, Xike Xu<sup>1, †</sup>, Xintong Wei<sup>2, †</sup>, Jiayun Xin<sup>1,2</sup>, Shanshan Li<sup>3</sup>, Yanhui  
Lv<sup>1,2</sup>, Wei Chen<sup>1</sup>, Wenlin Yuan<sup>1</sup>, Bin Xie<sup>1</sup>, Xianpeng Zu<sup>1,\*</sup>, Yunheng Shen<sup>1,\*</sup>**

<sup>1</sup> School of Pharmacy, Naval Medical University, Shanghai 200433, China

<sup>2</sup> School of Pharmacy, Shandong University of Traditional Chinese Medicine, Jinan  
250355, China

<sup>3</sup> School of Pharmaceutical Sciences and Yunnan Key Laboratory of Pharmacology  
for Natural Products, Kunming Medical University, Kunming 650500, Yunnan,  
China

\* Correspondence: zuxianpeng@163.com (X.Z.); shenyunheng@hotmail.com (Y.S.)

<sup>†</sup> These authors contributed equally to this work.

## Contents

|                                                                                               |
|-----------------------------------------------------------------------------------------------|
| Figure S1. HR-ESI-MS spectrum of compound <b>1</b>                                            |
| Figure S2. OR Valve of compound <b>1</b> in MeOH                                              |
| Figure S3. UV spectrum of compound <b>1</b> in MeOH                                           |
| Figure S4. CD spectrum of compound <b>1</b> in MeOH                                           |
| Figure S5. $^1\text{H}$ NMR spectrum of compound <b>1</b> in $\text{CDCl}_3$                  |
| Figure S6. $^{13}\text{C}$ NMR and DEPT spectrum of compound <b>1</b> in $\text{CDCl}_3$      |
| Figure S7. $^1\text{H}$ - $^1\text{H}$ COSY spectrum of compound <b>1</b> in $\text{CDCl}_3$  |
| Figure S8. HMBC spectrum of compound <b>1</b> in $\text{CDCl}_3$                              |
| Figure S9. HSQC spectrum of compound <b>1</b> in $\text{CDCl}_3$                              |
| Figure S10. NOESY spectrum of compound <b>1</b> in $\text{CDCl}_3$                            |
| Figure S11. HR-ESI-MS spectrum of compound <b>2</b>                                           |
| Figure S12. OR Valve of compound <b>2</b> in MeOH                                             |
| Figure S13. UV spectrum of compound <b>2</b> in MeOH                                          |
| Figure S14. CD spectrum of compound <b>2</b> in MeOH                                          |
| Figure S15. $^1\text{H}$ NMR spectrum of compound <b>2</b> in $\text{CDCl}_3$                 |
| Figure S16. $^{13}\text{C}$ NMR and DEPT spectrum of compound <b>2</b> in $\text{CDCl}_3$     |
| Figure S17. $^1\text{H}$ - $^1\text{H}$ COSY spectrum of compound <b>2</b> in $\text{CDCl}_3$ |
| Figure S18. HMBC spectrum of compound <b>2</b> in $\text{CDCl}_3$                             |
| Figure S19. HSQC spectrum of compound <b>2</b> in $\text{CDCl}_3$                             |
| Figure S20. NOESY spectrum of compound <b>2</b> in $\text{CDCl}_3$                            |
| Figure S21. HR-ESI-MS spectrum of compound <b>3</b>                                           |
| Figure S22. OR valve of compound <b>3</b> in MeOH                                             |
| Figure S23. UV spectrum of compound <b>3</b> in MeOH                                          |
| Figure S24. CD spectrum of compound <b>3</b> in MeOH                                          |
| Figure S25. $^1\text{H}$ NMR spectrum of compound <b>3</b> in $\text{CDCl}_3$                 |
| Figure S26. $^{13}\text{C}$ NMR and DEPT spectrum of compound <b>3</b> in $\text{CDCl}_3$     |
| Figure S27. $^1\text{H}$ - $^1\text{H}$ COSY spectrum of compound <b>3</b> in $\text{CDCl}_3$ |
| Figure S28. HMBC spectrum of compound <b>3</b> in $\text{CDCl}_3$                             |

Figure S29. HSQC spectrum of compound **3** in CDCl<sub>3</sub>

Figure S30. NOESY spectrum of compound **3** in CDCl<sub>3</sub>

Figure S31. HR-ESI-MS spectrum of compound **4**

Figure S32. OR valve of compound **4** in MeOH

Figure S33. UV spectrum of compound **4** in MeOH

Figure S34. CD spectrum of compound **4** in MeOH

Figure S35. <sup>1</sup>H NMR spectrum of compound **4** in CDCl<sub>3</sub>

Figure S36. <sup>13</sup>C NMR and DEPT spectrum of compound **4** in CDCl<sub>3</sub>

Figure S37. <sup>1</sup>H-<sup>1</sup>H COSY spectrum of compound **4** in CDCl<sub>3</sub>

Figure S38. HMBC spectrum of compound **4** in CDCl<sub>3</sub>

Figure S39. HSQC spectrum of compound **4** in CDCl<sub>3</sub>

Figure S40. NOESY spectrum of compound **4** in CDCl<sub>3</sub>

Figure S41. HR-ESI-MS spectrum of compound **5**

Figure S42. OR valve of compound **5** in MeOH

Figure S43. UV spectrum of compound **5** in MeOH

Figure S44. CD spectrum of compound **5** in MeOH

Figure S45. <sup>1</sup>H NMR spectrum of compound **5** in CDCl<sub>3</sub>

Figure S46. <sup>13</sup>C NMR and DEPT spectrum of compound **5** in CDCl<sub>3</sub>

Figure S47. <sup>1</sup>H-<sup>1</sup>H COSY spectrum of compound **5** in CDCl<sub>3</sub>

Figure S48. HMBC spectrum of compound **5** in CDCl<sub>3</sub>

Figure S49. HSQC spectrum of compound **5** in CDCl<sub>3</sub>

Figure S50. NOESY spectrum of compound **5** in CDCl<sub>3</sub>

Figure S51. HR-ESI-MS spectrum of compound **6**

Figure S52. OR valve of compound **6** in MeOH

Figure S53. UV spectrum of compound **6** in MeOH

Figure S54. CD spectrum of compound **6** in MeOH

Figure S55. <sup>1</sup>H NMR spectrum of compound **6** in C<sub>3</sub>D<sub>6</sub>O

Figure S56. <sup>13</sup>C NMR and DEPT spectrum of compound **6** in C<sub>3</sub>D<sub>6</sub>O

Figure S57. <sup>1</sup>H - <sup>1</sup>H COSY spectrum of compound **6** in C<sub>3</sub>D<sub>6</sub>O

Figure S58. HMBC spectrum of compound **6** in C<sub>3</sub>D<sub>6</sub>O

Figure S59. HSQC spectrum of compound **6** in C<sub>3</sub>D<sub>6</sub>O

Figure S60. NOESY spectrum of compound **6** in C<sub>3</sub>D<sub>6</sub>O

Figure S61. HR-ESI-MS spectrum of compound **7**

Figure S62. OR valve of compound **7** in MeOH

Figure S63. UV spectrum of compound **7** in MeOH

Figure S64. CD spectrum of compound **7** in MeOH

Figure S65. <sup>1</sup>H NMR spectrum of compound **7** in CDCl<sub>3</sub>

Figure S66. <sup>13</sup>C NMR and DEPT spectrum of compound **7** in CDCl<sub>3</sub>

Figure S67. <sup>1</sup>H-<sup>1</sup>H COSY spectrum of compound **7** in CDCl<sub>3</sub>

Figure S68. HMBC spectrum of compound **7** in CDCl<sub>3</sub>

Figure S69. HSQC spectrum of compound **7** in CDCl<sub>3</sub>

Figure S70. NOESY spectrum of compound **7** in CDCl<sub>3</sub>

Figure S71. HR-ESI-MS spectrum of compound **8**

Figure S72. OR Valve of compound **8** in MeOH

Figure S73. UV spectrum of compound **8** in MeOH

Figure S74. CD spectrum of compound **8** in MeOH

Figure S75. <sup>1</sup>H NMR spectrum of compound **8** in CDCl<sub>3</sub>

Figure S76. <sup>13</sup>C NMR and DEPT spectrum of compound **8** in CDCl<sub>3</sub>

Figure S77. <sup>1</sup>H-<sup>1</sup>H COSY spectrum of compound **8** in CDCl<sub>3</sub>

Figure S78. HMBC spectrum of compound **8** in CDCl<sub>3</sub>

Figure S79. HSQC spectrum of compound **8** in CDCl<sub>3</sub>

Figure S80. NOESY spectrum of compound **8** in CDCl<sub>3</sub>

Figure S81. HR-ESI-MS spectrum of compound **9**

Figure S82. OR Valve of compound **9** in MeOH

Figure S83. UV spectrum of compound **9** in MeOH

Figure S84. CD spectrum of compound **9** in MeOH

Figure S85. <sup>1</sup>H NMR spectrum of compound **9** in CDCl<sub>3</sub>

Figure S86. <sup>13</sup>C NMR and DEPT spectrum of compound **9** in CDCl<sub>3</sub>



Figure S87.  $^1\text{H}$  -  $^1\text{H}$  COSY spectrum of compound **9** in  $\text{CDCl}_3$

Figure S88. HMBC spectrum of compound **9** in  $\text{CDCl}_3$

Figure S89. HSQC spectrum of compound **9** in  $\text{CDCl}_3$

Figure S90. NOESY spectrum of compound **9** in  $\text{CDCl}_3$

Figure S91. HR-ESI-MS spectrum of compound **10**

Figure S92.  $^1\text{H}$  NMR spectrum of compound **10** in  $\text{CDCl}_3$

Figure S93.  $^{13}\text{C}$  NMR and DEPT spectrum of compound **10** in  $\text{CDCl}_3$

Figure S94. HR-ESI-MS spectrum of compound **11**

Figure S95. OR valve of compound **11** in MeOH

Figure S96. UV spectrum of compound **11** in MeOH

Figure S97. CD spectrum of compound **11** in MeOH

Figure S98.  $^1\text{H}$  NMR spectrum of compound **11** in  $\text{CDCl}_3$

Figure S99.  $^{13}\text{C}$  NMR and DEPT spectrum of compound **11** in  $\text{CDCl}_3$

Figure S100.  $^1\text{H}$ - $^1\text{H}$  COSY spectrum of compound **11** in  $\text{CDCl}_3$

Figure S101. HMBC spectrum of compound **11** in  $\text{CDCl}_3$

Figure S102. HSQC spectrum of compound **11** in  $\text{CDCl}_3$

Figure S103. NOESY spectrum of compound **11** in  $\text{CDCl}_3$

Figure S104. HR-ESI-MS spectrum of compound **12**

Figure S105. OR valve of compound **12** in MeOH

Figure S106. UV spectrum of compound **12** in MeOH

Figure S107. CD spectrum of compound **12** in MeOH

Figure S108.  $^1\text{H}$  NMR spectrum of compound **12** in  $\text{CDCl}_3$

Figure S109.  $^{13}\text{C}$  NMR and DEPT spectrum of compound **12** in  $\text{CDCl}_3$

Figure S110.  $^1\text{H}$  -  $^1\text{H}$  COSY spectrum of compound **12** in  $\text{CDCl}_3$

Figure S111. HMBC spectrum of compound **12** in  $\text{CDCl}_3$

Figure S112. HSQC spectrum of compound **12** in  $\text{CDCl}_3$

Figure S113. NOESY spectrum of compound **12** in  $\text{CDCl}_3$

Table S1. Effects of metabolites on proliferation of four strains of human cells  
(Inhibition rate %)

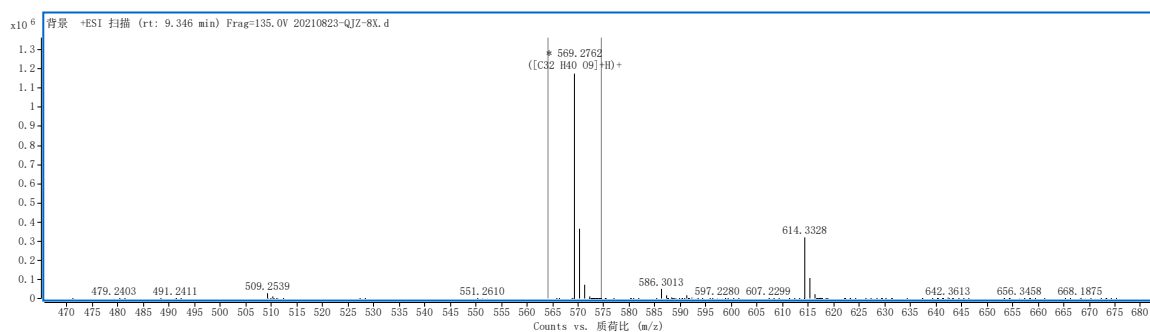

| Best | Formula(M)                                     | Ion Formula                                    | Tgt (m/z) | m/z      | Diff (ppm) |
|------|------------------------------------------------|------------------------------------------------|-----------|----------|------------|
| TRUE | C <sub>32</sub> H <sub>40</sub> O <sub>9</sub> | C <sub>32</sub> H <sub>41</sub> O <sub>9</sub> | 569.2745  | 569.2762 | 2.99       |

Figure S1. HR-ESI-MS spectrum of compound **1**

#### Rudolph Research Analytical

Monday, 10/11/2021

This sample was measured on an Autopol VI, serial number 90079, manufactured by Rudolph Research Analytical, Hackettstown, NJ.

LotID : QJZ-8  
Set Temperature : 20.0  
Temp Corr : OFF

| n    | Average   | Std.Dev.    | Maximum | Minimum |          |     |        |       |       |         |
|------|-----------|-------------|---------|---------|----------|-----|--------|-------|-------|---------|
| 6    | 116.102   | 0.0000      | 116.102 | 116.102 |          |     |        |       |       |         |
| S.No | Sample ID | Time        | Result  | Scale   | OR ° Arc | WLG | Lg.mm  | Conc. | Temp. | Comment |
| 1    | QJZ-8     | 10:45:38 AM | 116.102 | SR      | 0.137    | 589 | 100.00 | 0.118 | 19.7  |         |
| 2    | QJZ-8     | 10:45:45 AM | 116.102 | SR      | 0.137    | 589 | 100.00 | 0.118 | 19.7  |         |
| 3    | QJZ-8     | 10:45:53 AM | 116.102 | SR      | 0.137    | 589 | 100.00 | 0.118 | 19.7  |         |
| 4    | QJZ-8     | 10:46:00 AM | 116.102 | SR      | 0.137    | 589 | 100.00 | 0.118 | 19.7  |         |
| 5    | QJZ-8     | 10:46:08 AM | 116.102 | SR      | 0.137    | 589 | 100.00 | 0.118 | 19.8  |         |
| 6    | QJZ-8     | 10:46:15 AM | 116.102 | SR      | 0.137    | 589 | 100.00 | 0.118 | 19.8  |         |

Signature

Figure S2. OR valve of compound **1** in MeOH

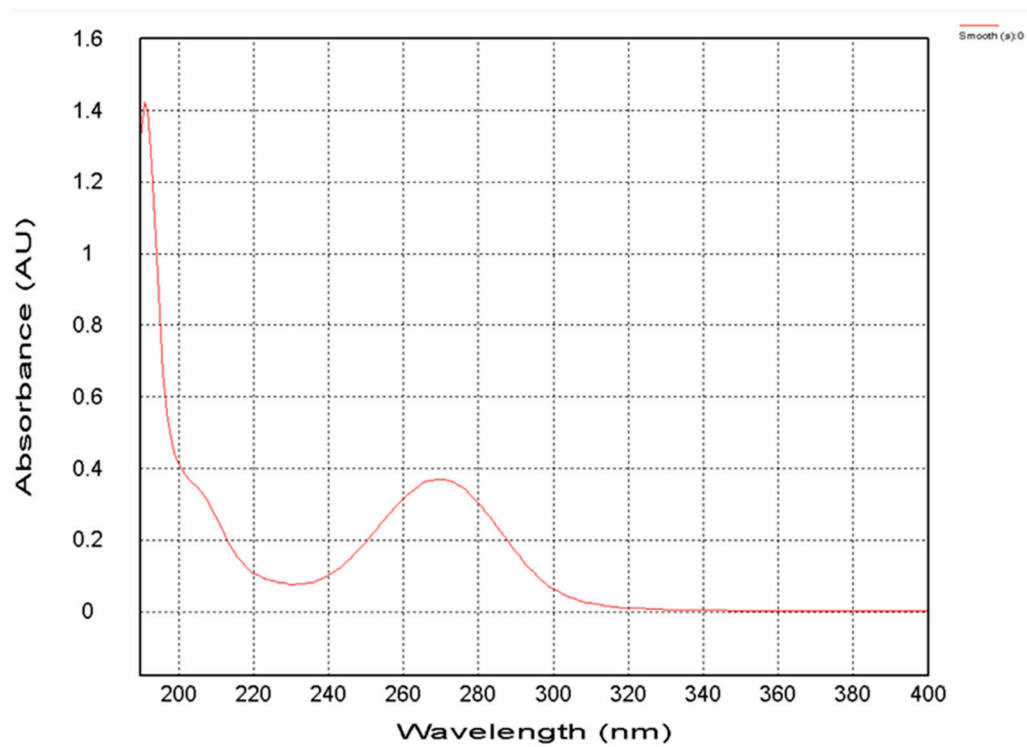

Figure S3. UV spectrum of compound **1** in MeOH

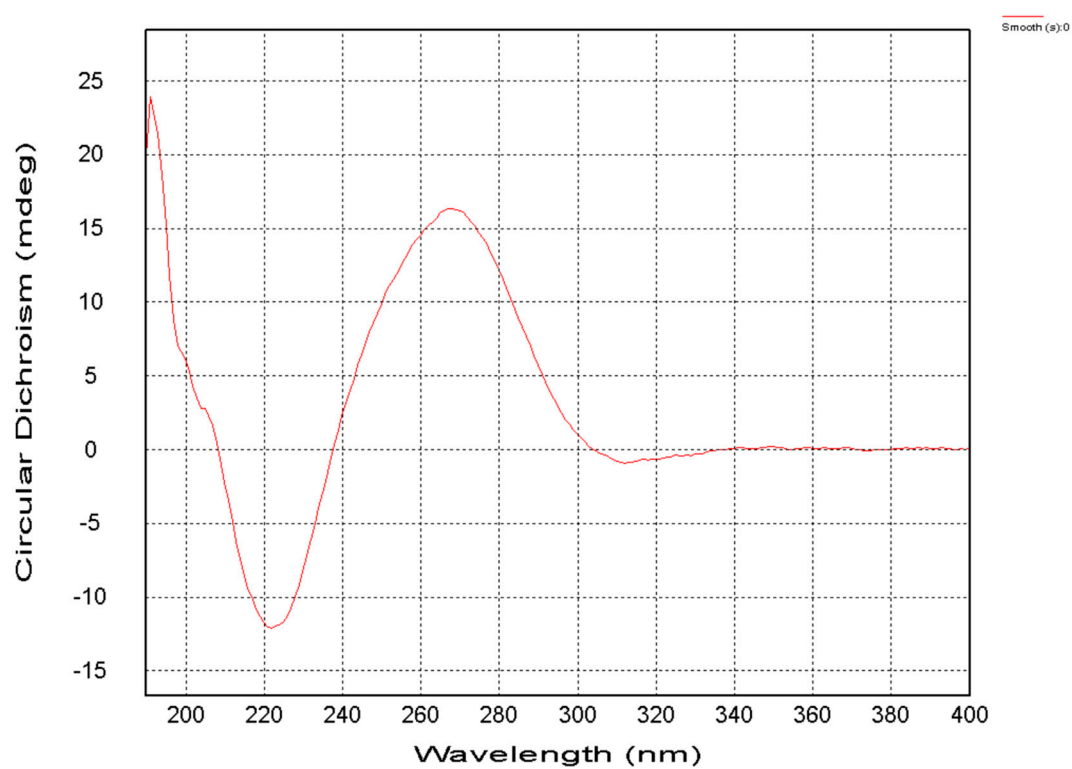

Figure S4. CD spectrum of compound **1** in MeOH

XSJ-QJZ-8  $^1\text{H}$  NMR (500 MHz,  $\text{CDCl}_3$ )

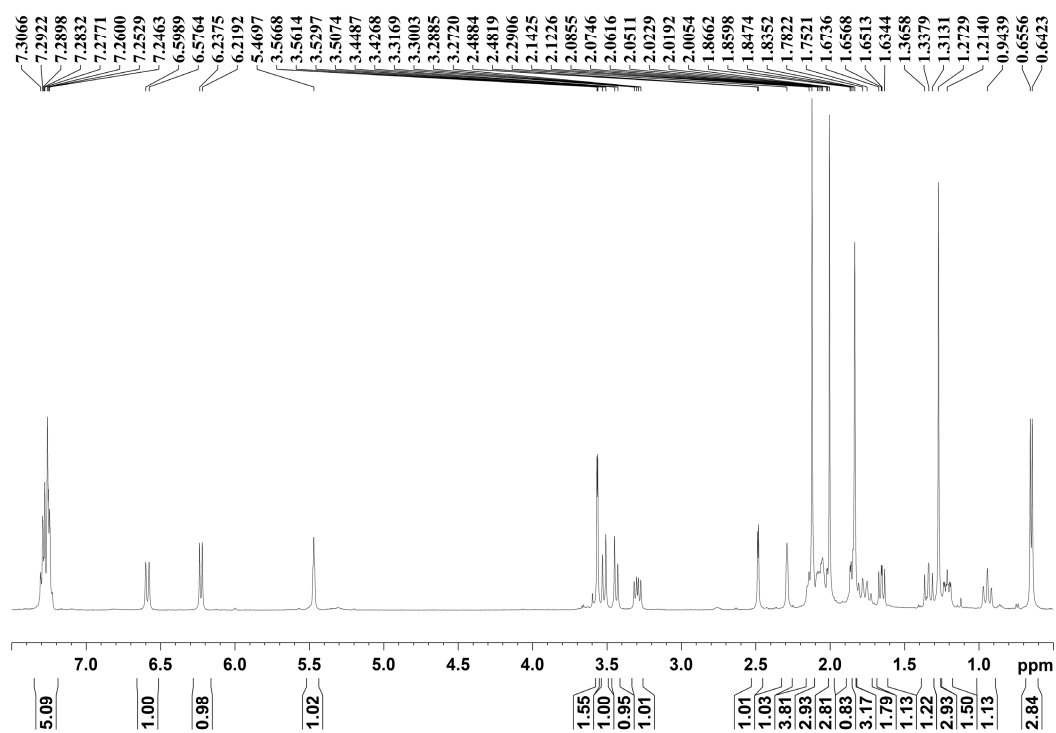

Figure S5.  $^1\text{H}$  NMR spectrum of compound **1** in  $\text{CDCl}_3$

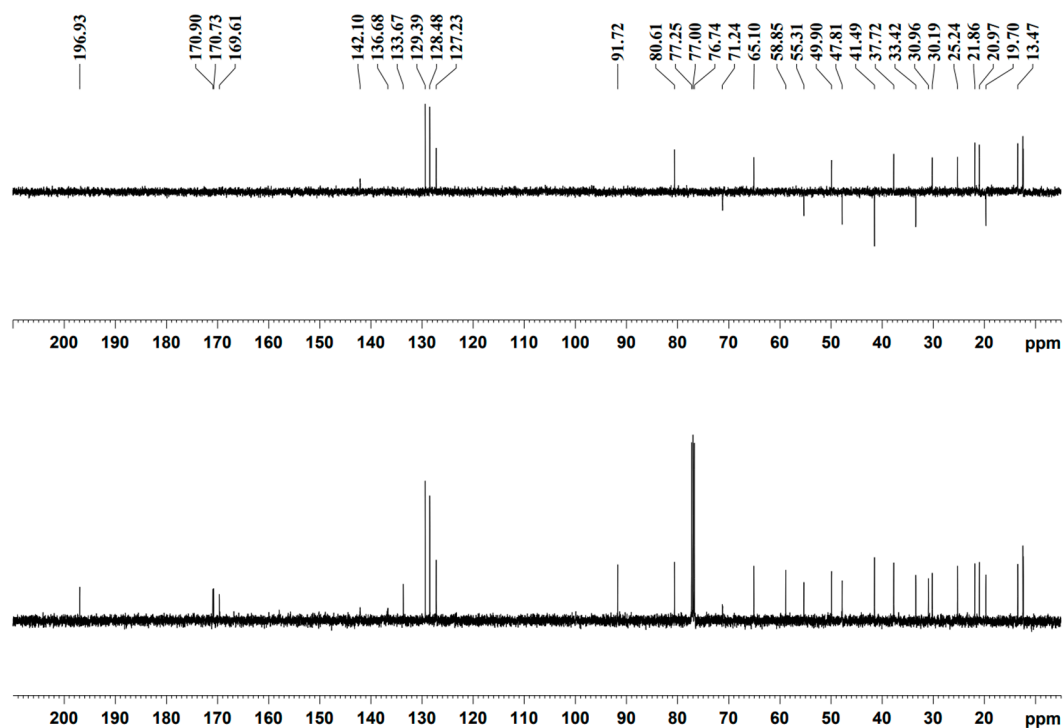

Figure S6.  $^{13}\text{C}$  NMR and DEPT spectrum of compound **1** in  $\text{CDCl}_3$

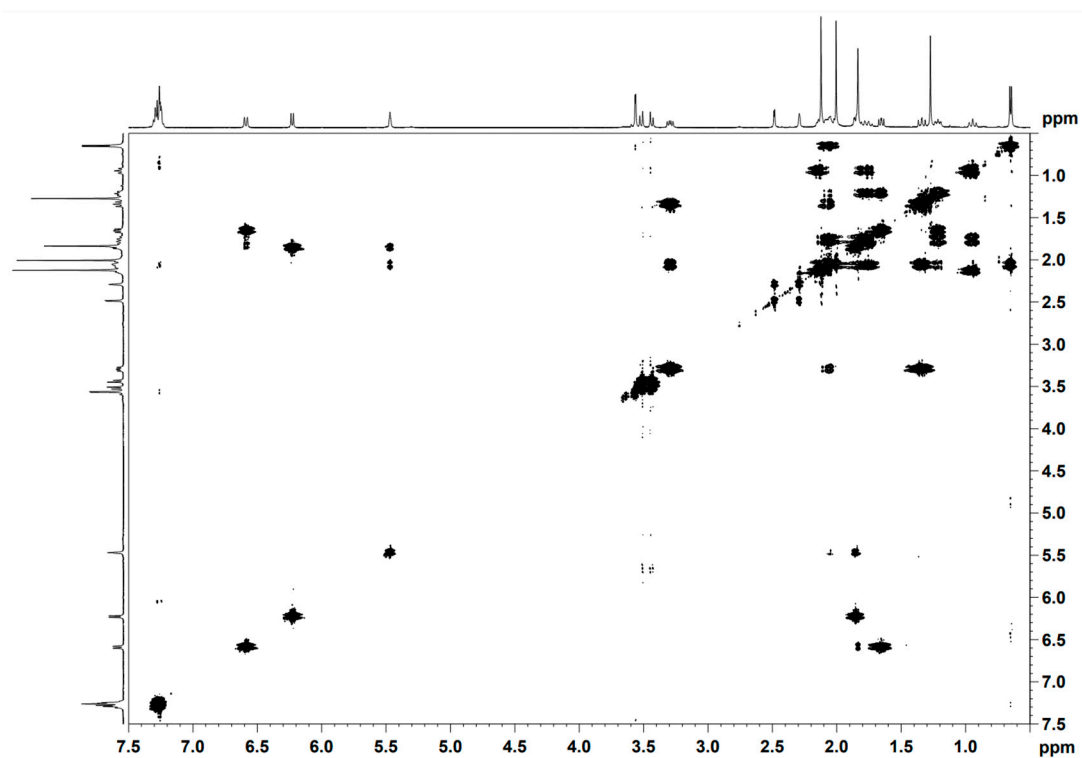

Figure S7.  $^1\text{H}$ - $^1\text{H}$  COSY spectrum of compound **1** in  $\text{CDCl}_3$

XSJ-QJZ-8 HMBC

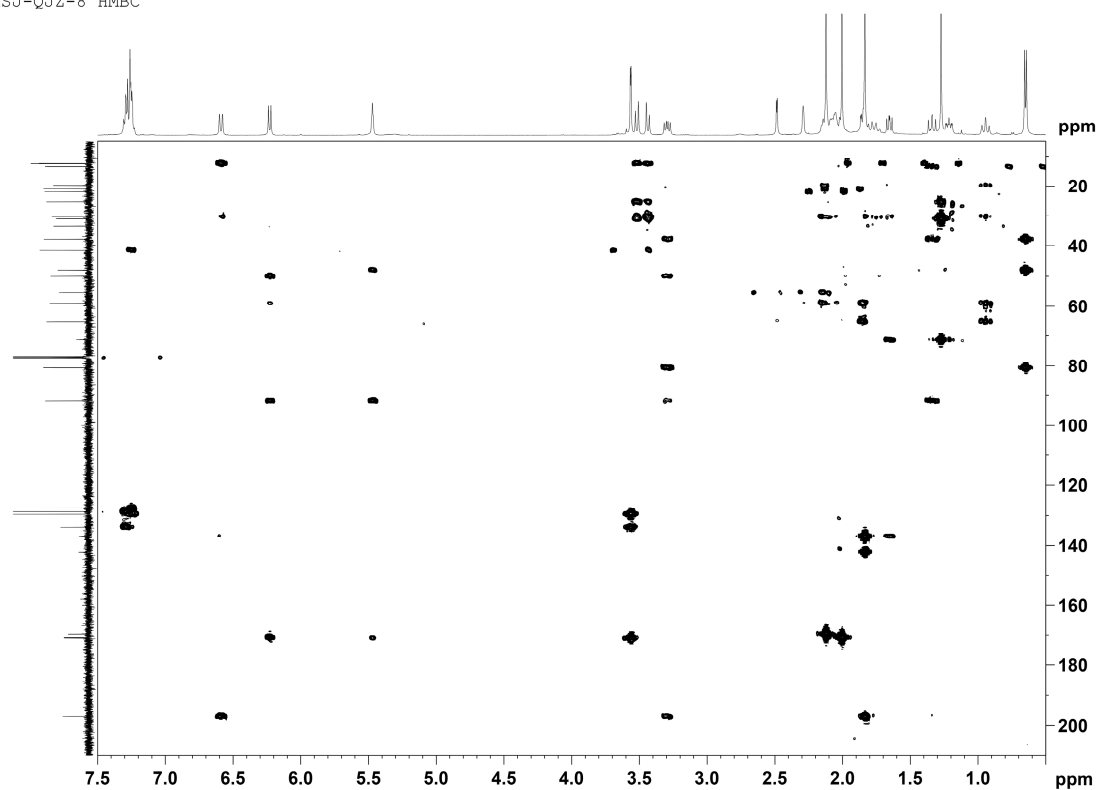

Figure S8. HMBC spectrum of compound **1** in  $\text{CDCl}_3$

XSJ-QJZ-8 HSQC

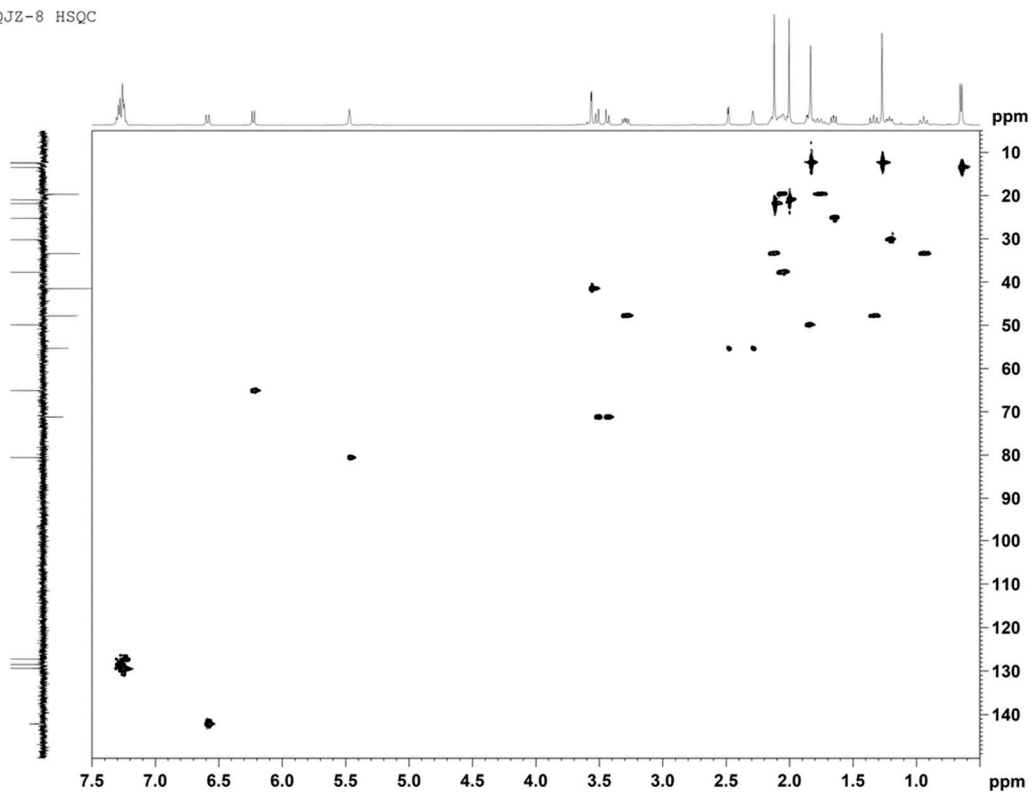

Figure S9. HSQC spectrum of compound **1** in CDCl<sub>3</sub>

XSJ-QJZ-8 NOESY

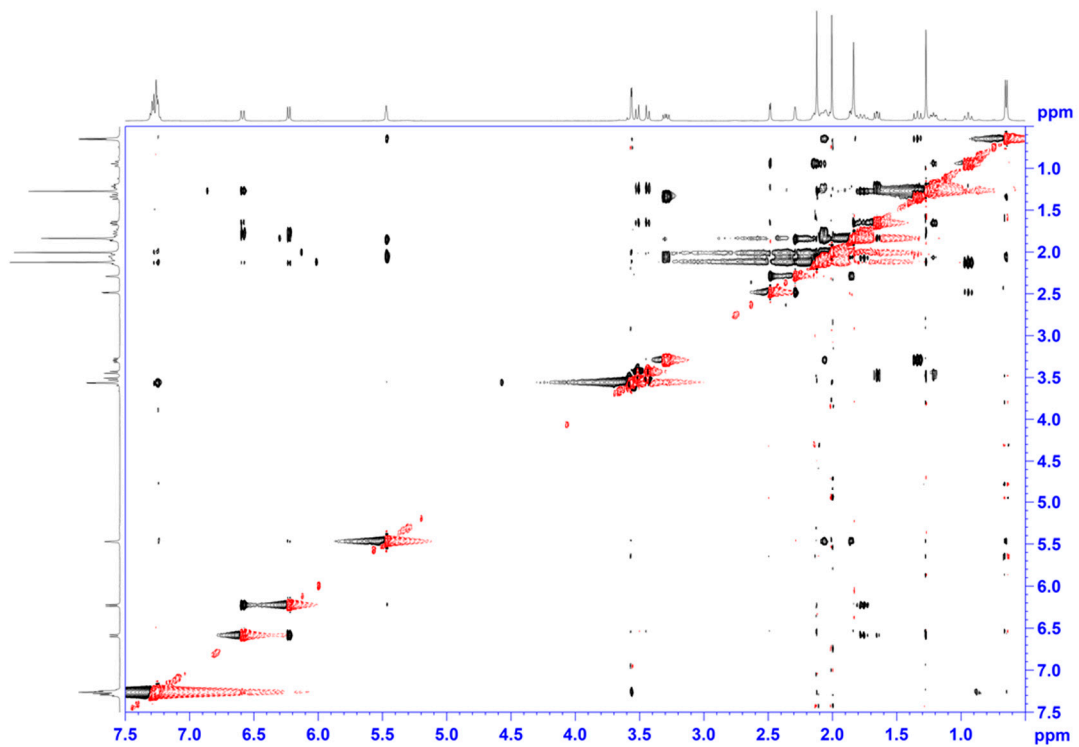

Figure S10. NOESY spectrum of compound **1** in CDCl<sub>3</sub>

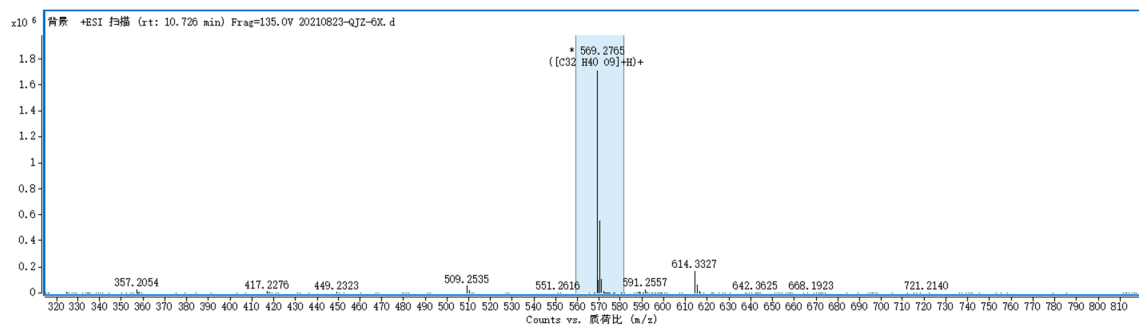

| Best | Formula(M)                                     | Ion Formula                                    | Tgt (m/z) | m/z      | Diff (ppm) |
|------|------------------------------------------------|------------------------------------------------|-----------|----------|------------|
| TRUE | C <sub>32</sub> H <sub>40</sub> O <sub>9</sub> | C <sub>32</sub> H <sub>41</sub> O <sub>9</sub> | 569.2745  | 569.2765 | 3.51       |

Figure S11. HR-ESI-MS spectrum of compound **2**

#### Rudolph Research Analytical

Monday, 10/11/2021

This sample was measured on an Autopol VI, serial number 90079, manufactured by Rudolph Research Analytical, Hackettstown, NJ.

LotID : QJZ-6  
Set Temperature : 20.0  
Temp Corr : OFF

| n    | Average   | Std.Dev.    | Maximum | Minimum |          |     |        |       |       |         |
|------|-----------|-------------|---------|---------|----------|-----|--------|-------|-------|---------|
| 6    | 74.889    | 0.3140      | 75.333  | 74.667  |          |     |        |       |       |         |
| S.No | Sample ID | Time        | Result  | Scale   | OR ° Arc | WLG | Lg.mm  | Conc. | Temp. | Comment |
| 1    | QJZ-6     | 11:09:52 AM | 75.333  | SR      | 0.113    | 589 | 100.00 | 0.150 | 19.7  |         |
| 2    | QJZ-6     | 11:10:00 AM | 75.333  | SR      | 0.113    | 589 | 100.00 | 0.150 | 19.7  |         |
| 3    | QJZ-6     | 11:10:08 AM | 74.667  | SR      | 0.112    | 589 | 100.00 | 0.150 | 19.7  |         |
| 4    | QJZ-6     | 11:10:15 AM | 74.667  | SR      | 0.112    | 589 | 100.00 | 0.150 | 19.8  |         |
| 5    | QJZ-6     | 11:10:23 AM | 74.667  | SR      | 0.112    | 589 | 100.00 | 0.150 | 19.8  |         |
| 6    | QJZ-6     | 11:10:30 AM | 74.667  | SR      | 0.112    | 589 | 100.00 | 0.150 | 19.8  |         |

Signature

Figure S12. OR valve of compound **2** in MeOH

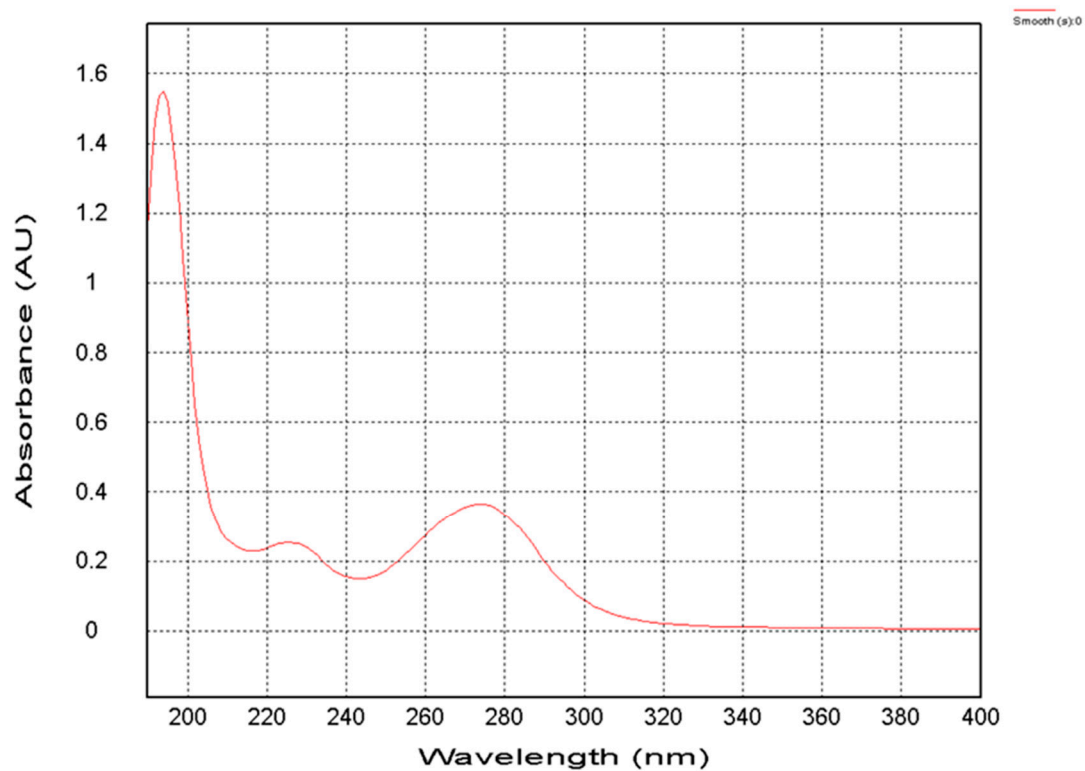

Figure S13. UV spectrum of compound **2** in MeOH

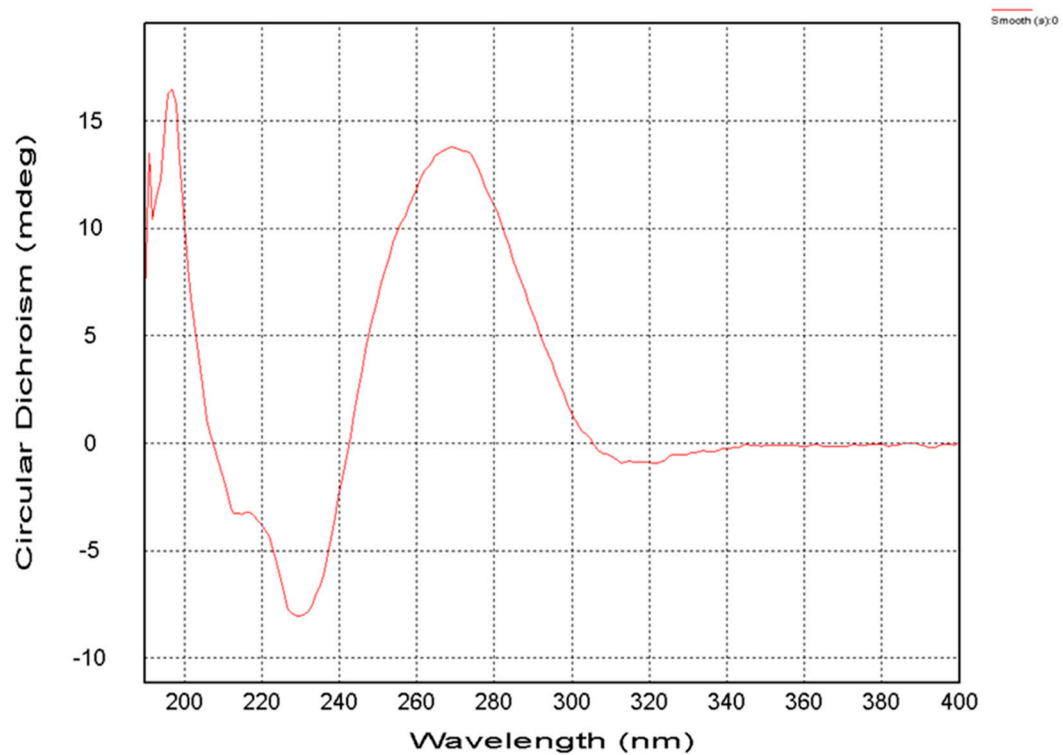

Figure S14. CD spectrum of compound **2** in MeOH



XSJ-QJZ-6  $^1\text{H}$  NMR (500 MHz,  $\text{CDCl}_3$ )

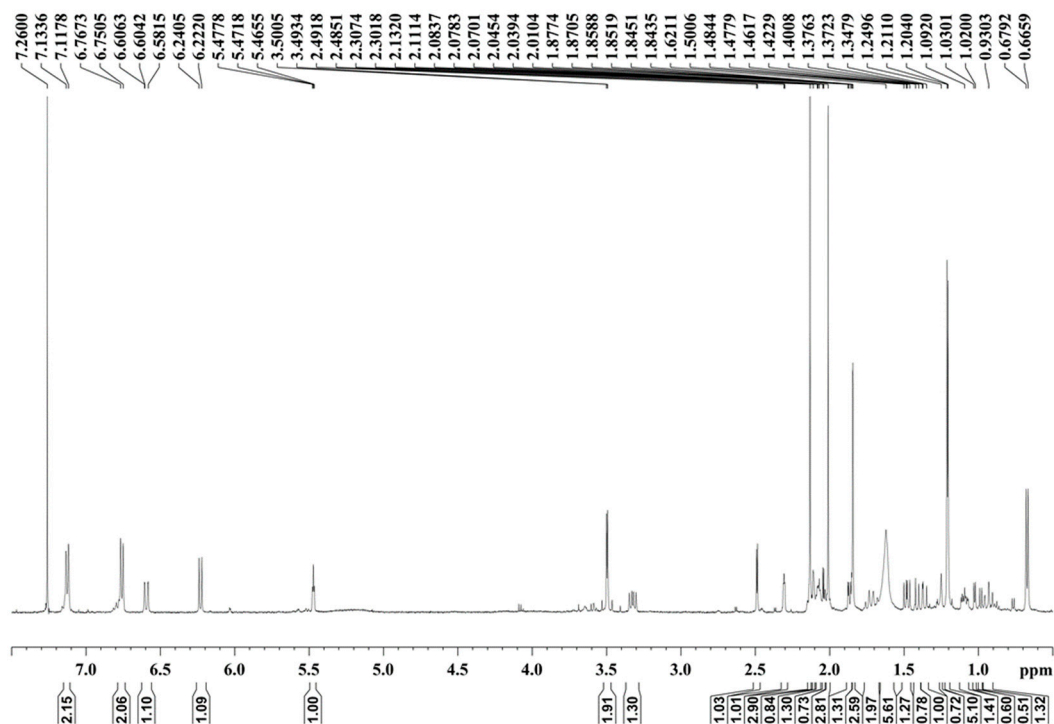

Figure S15.  $^1\text{H}$  NMR spectrum of compound **2** in  $\text{CDCl}_3$

XSJ-QJZ-6  $^{13}\text{C}$  and DEPT NMR (125 MHz,  $\text{CDCl}_3$ )

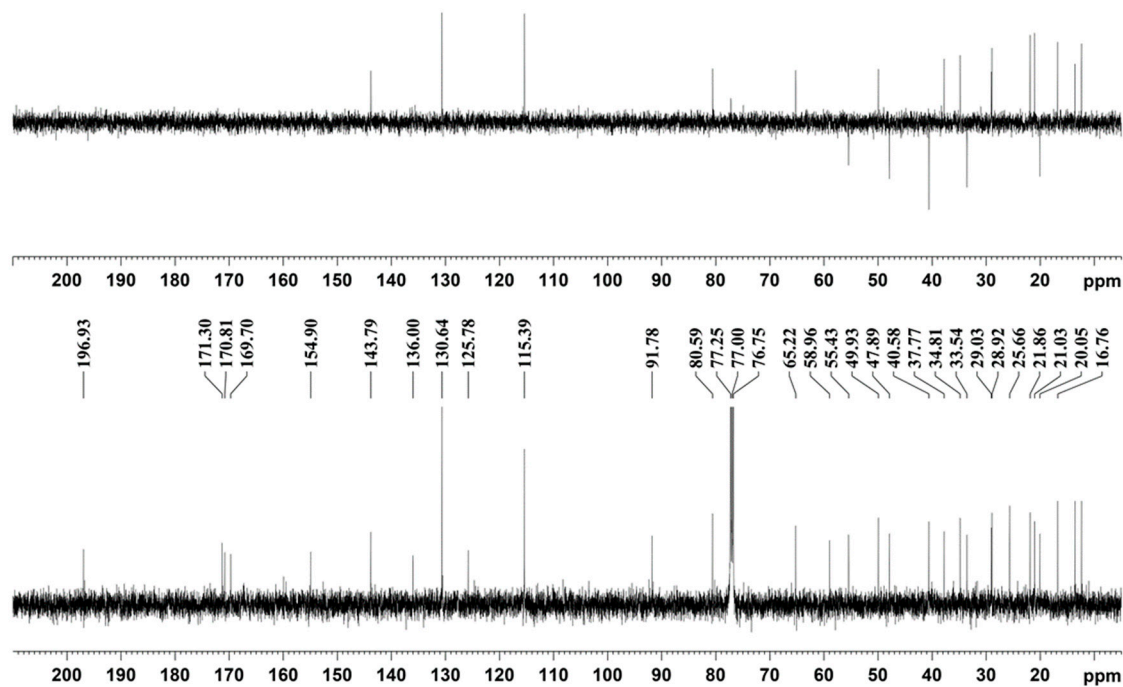

Figure S16.  $^{13}\text{C}$  NMR and DEPT spectrum of compound **2** in  $\text{CDCl}_3$

XSJ-QJZ-6 1H 1H COSY

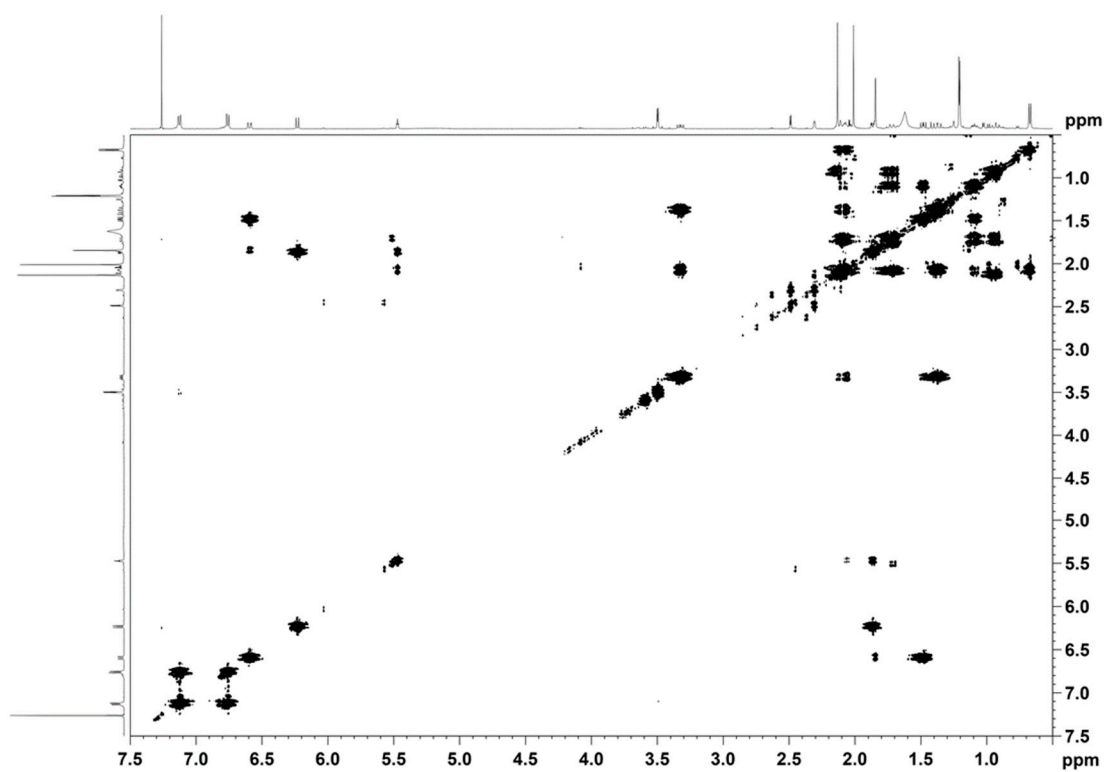

Figure S17.  $^1\text{H}$ - $^1\text{H}$  COSY spectrum of compound **2** in  $\text{CDCl}_3$

XSJ-QJZ-6 HMBC

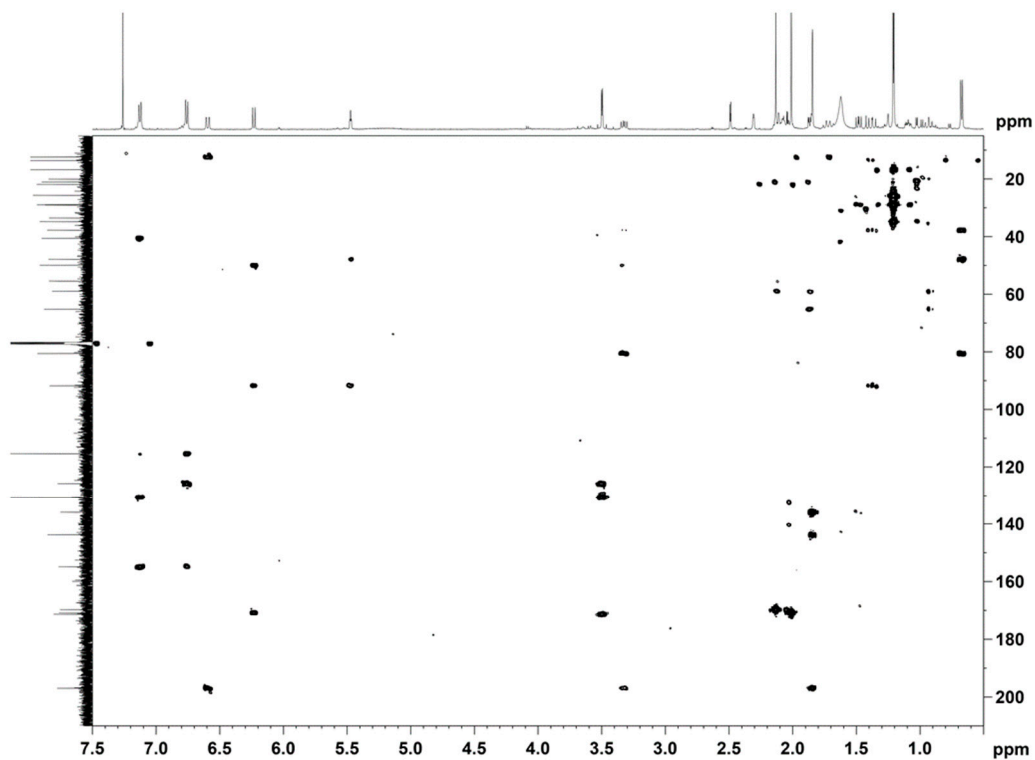

Figure S18. HMBC spectrum of compound **2** in  $\text{CDCl}_3$

XSJ-QJZ-6 HSQC

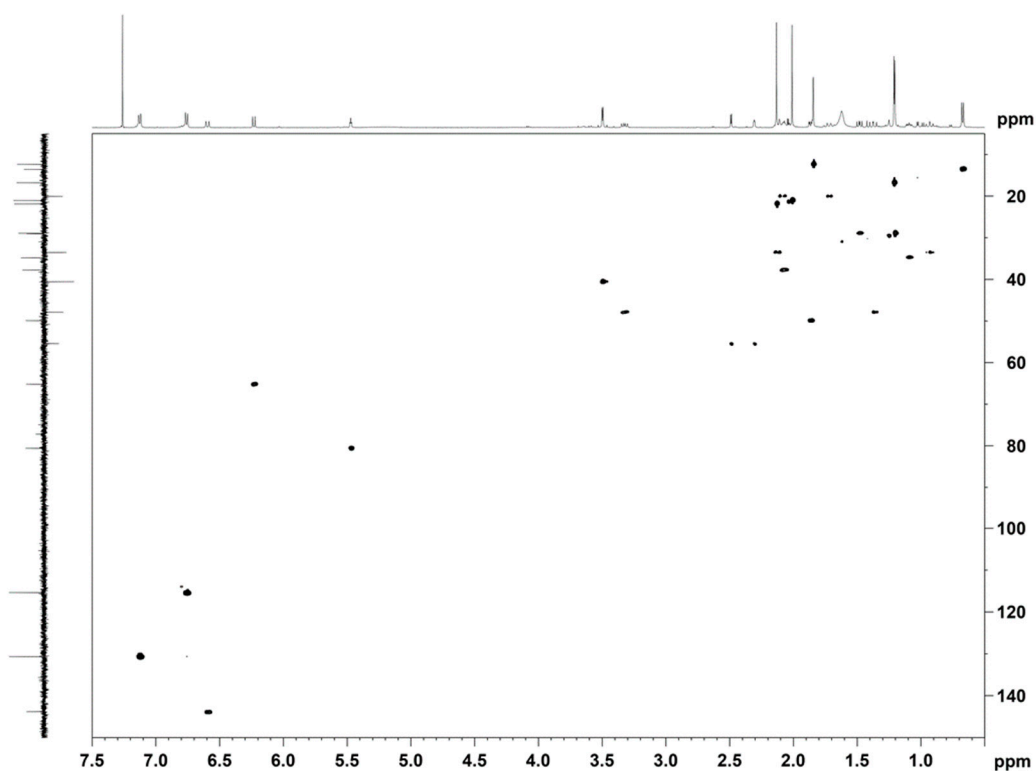

Figure S19. HSQC spectrum of compound **2** in CDCl<sub>3</sub>

XSJ-QJZ-6 NOESY

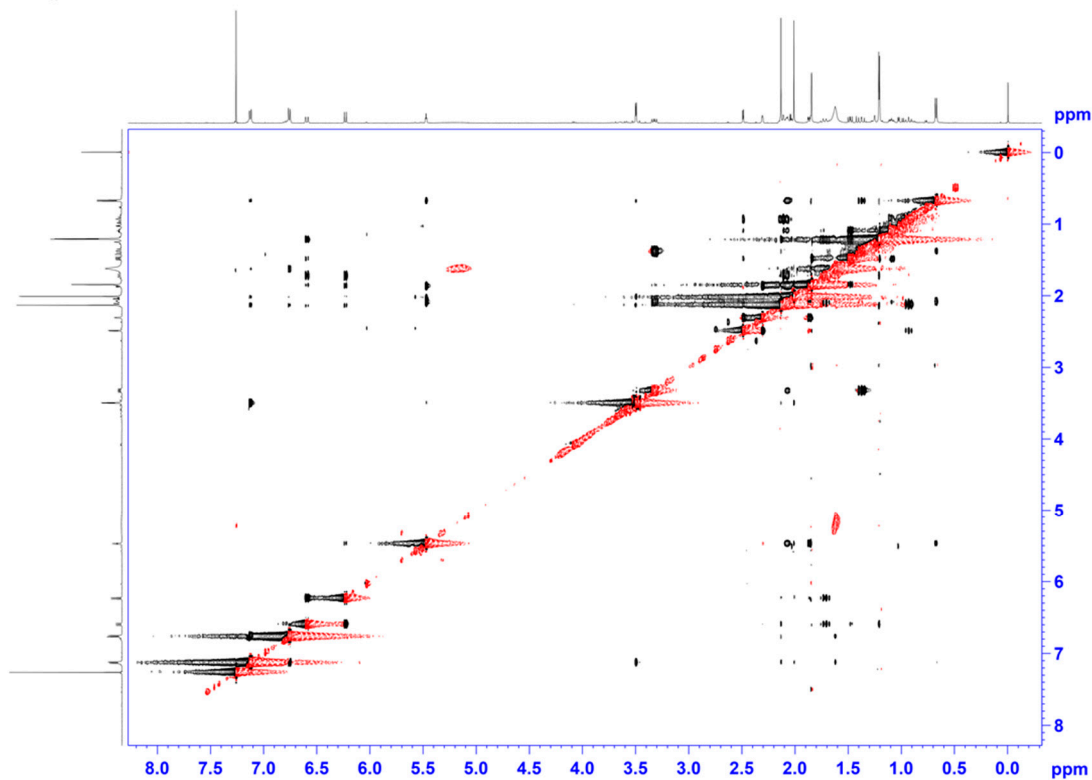

Figure S20. NOESY spectrum of compound **2** in CDCl<sub>3</sub>

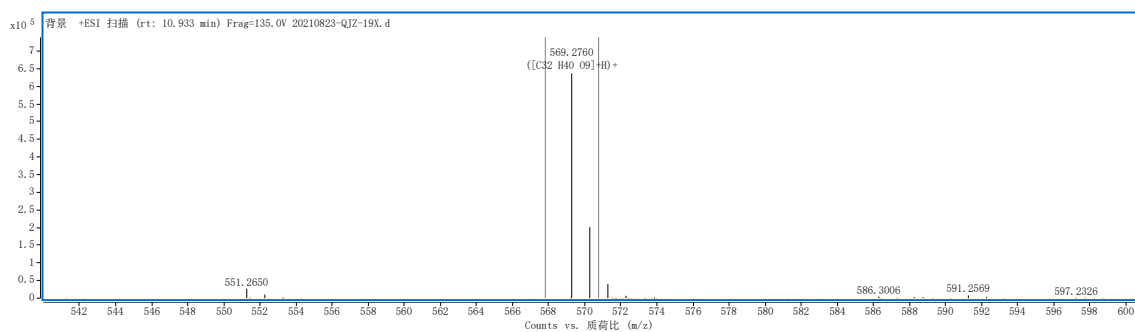

| Best | Formula(M)                                     | Ion Formula                                    | Tgt (m/z) | m/z      | Diff (ppm) |
|------|------------------------------------------------|------------------------------------------------|-----------|----------|------------|
| TRUE | C <sub>32</sub> H <sub>40</sub> O <sub>9</sub> | C <sub>32</sub> H <sub>41</sub> O <sub>9</sub> | 569.2745  | 569.2760 | 2.63       |

Figure S21. HR-ESI-MS spectrum of compound **3**

#### Rudolph Research Analytical

Saturday, 10/09/2021

This sample was measured on an Autopol VI, serial number 90079, manufactured by Rudolph Research Analytical, Hackettstown, NJ.

LotID : QJZ-19  
Set Temperature : 20.0  
Temp Corr : OFF

| n    | Average   | Std.Dev.    | Maximum | Minimum |          |     |        |       |       |         |
|------|-----------|-------------|---------|---------|----------|-----|--------|-------|-------|---------|
| 6    | 63.974    | 0.2866      | 64.615  | 63.846  |          |     |        |       |       |         |
| S.No | Sample ID | Time        | Result  | Scale   | OR ° Arc | WLG | Lg.mm  | Conc. | Temp. | Comment |
| 1    | QJZ-19    | 04:13:14 PM | 64.615  | SR      | 0.084    | 589 | 100.00 | 0.130 | 19.7  |         |
| 2    | QJZ-19    | 04:13:21 PM | 63.846  | SR      | 0.083    | 589 | 100.00 | 0.130 | 19.7  |         |
| 3    | QJZ-19    | 04:13:28 PM | 63.846  | SR      | 0.083    | 589 | 100.00 | 0.130 | 19.7  |         |
| 4    | QJZ-19    | 04:13:36 PM | 63.846  | SR      | 0.083    | 589 | 100.00 | 0.130 | 19.7  |         |
| 5    | QJZ-19    | 04:13:43 PM | 63.846  | SR      | 0.083    | 589 | 100.00 | 0.130 | 19.7  |         |
| 6    | QJZ-19    | 04:13:51 PM | 63.846  | SR      | 0.083    | 589 | 100.00 | 0.130 | 19.8  |         |

Signature

Figure S22. OR value of compound **3** in MeOH

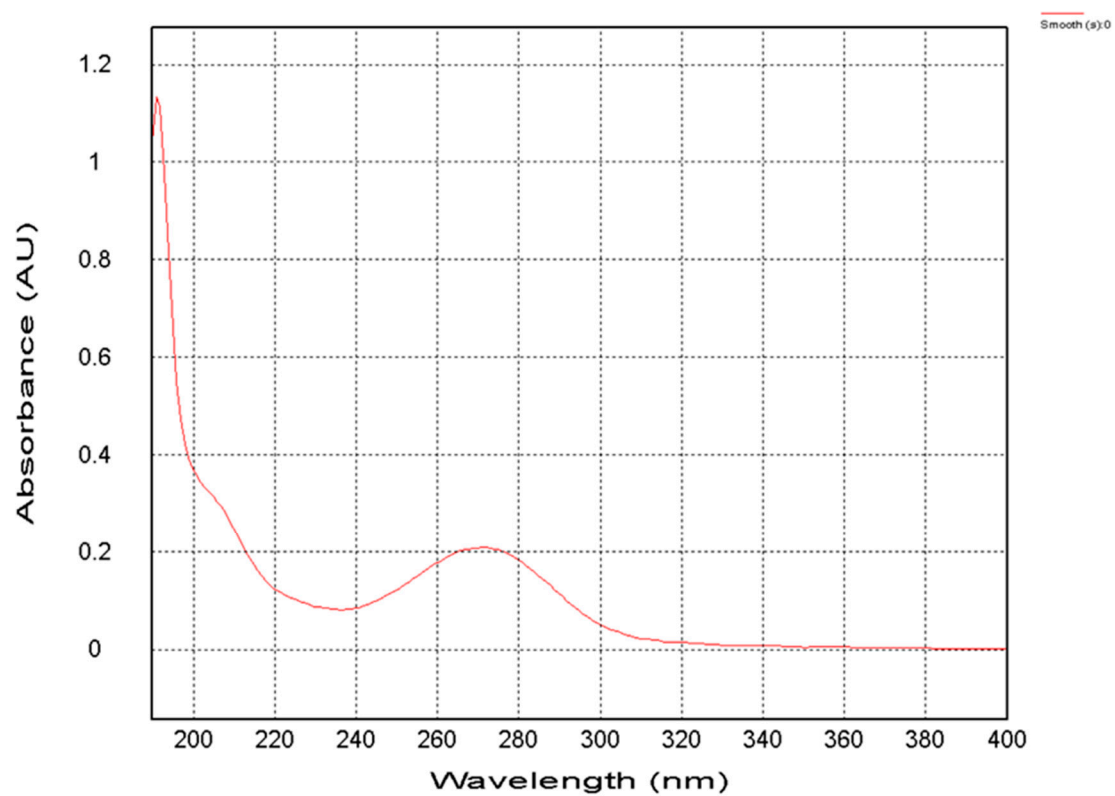

Figure S23. UV spectrum of compound **3** in MeOH

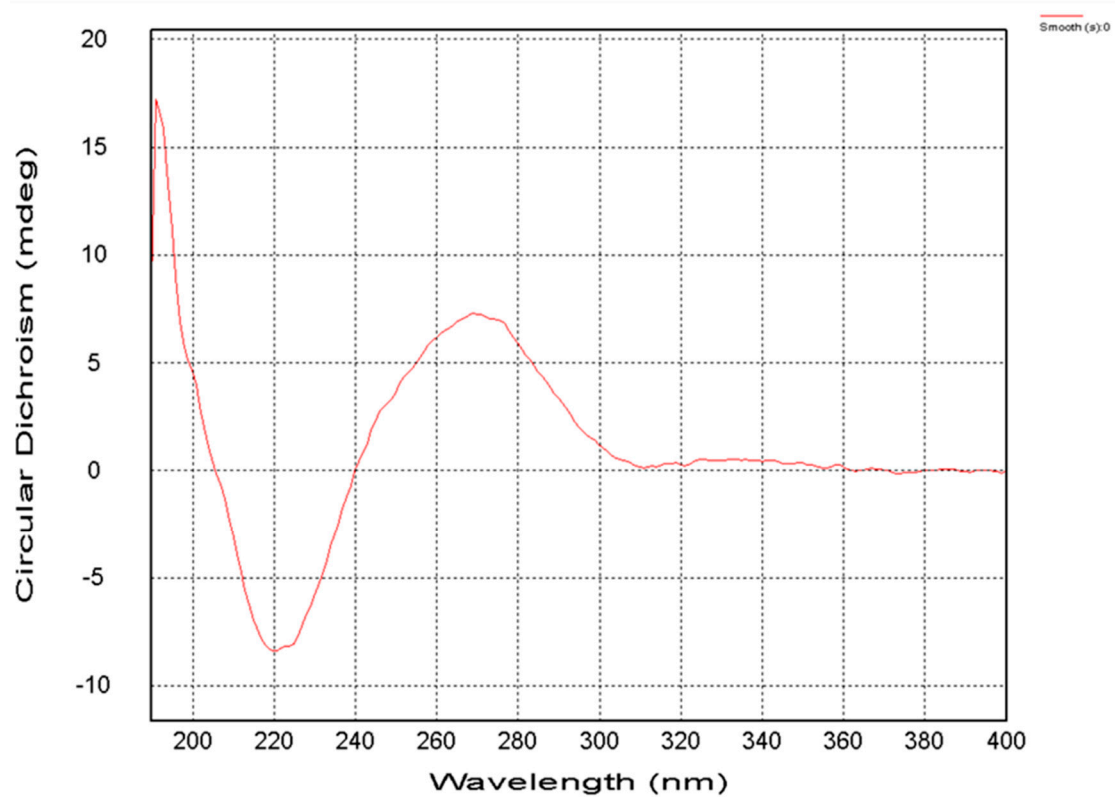

Figure S24. CD spectrum of compound **3** in MeOH

XSJ-QJZ-19  $^1\text{H}$  NMR (500 MHz,  $\text{CDCl}_3$ )

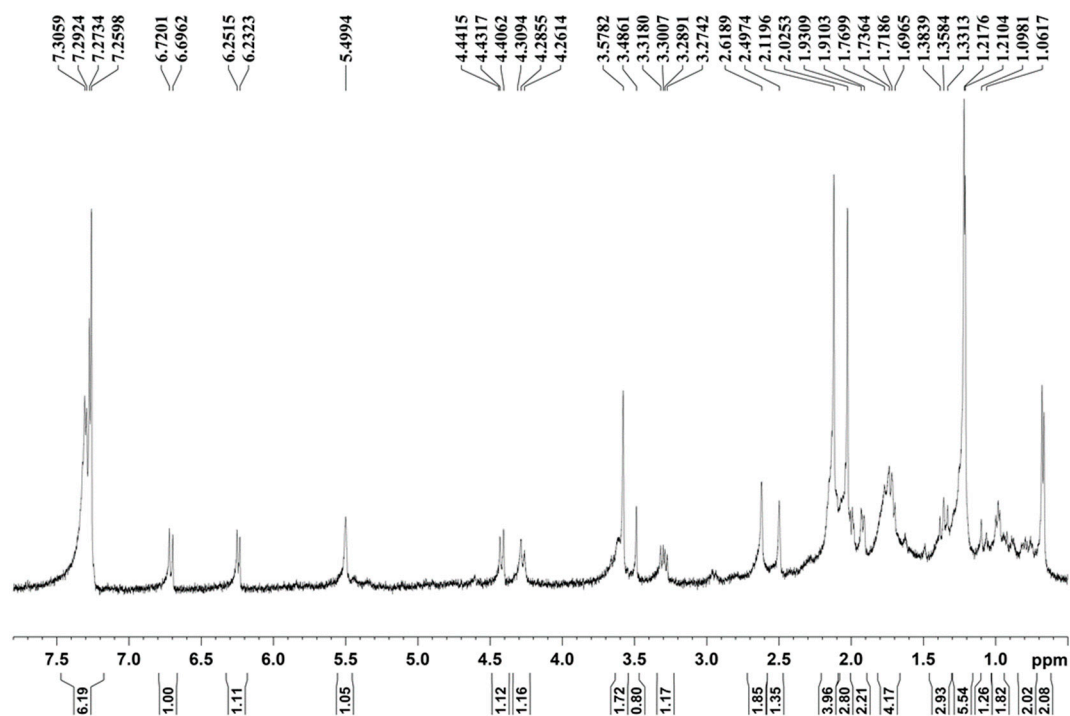

Figure S25.  $^1\text{H}$  NMR spectrum of compound **3** in  $\text{CDCl}_3$

XSJ-QJZ-19  $^{13}\text{C}$  and DEPT NMR (125 MHz,  $\text{CDCl}_3$ )

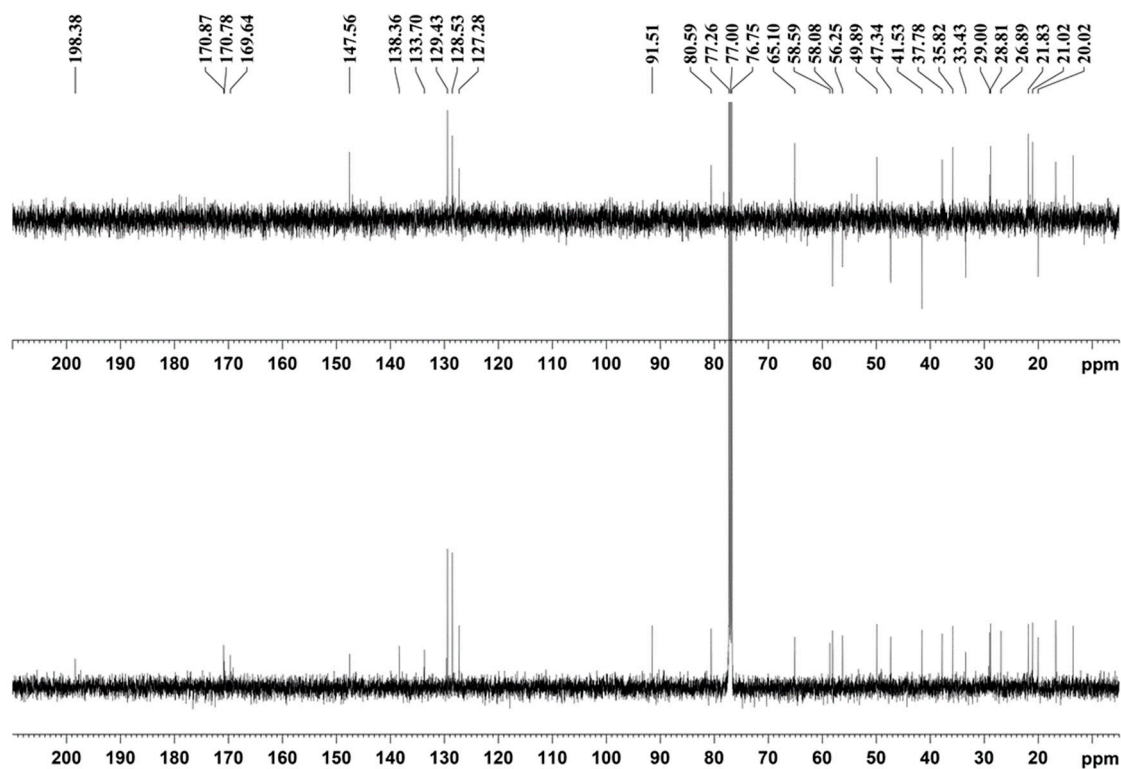

Figure S26.  $^{13}\text{C}$  NMR and DEPT spectrum of compound **3** in  $\text{CDCl}_3$

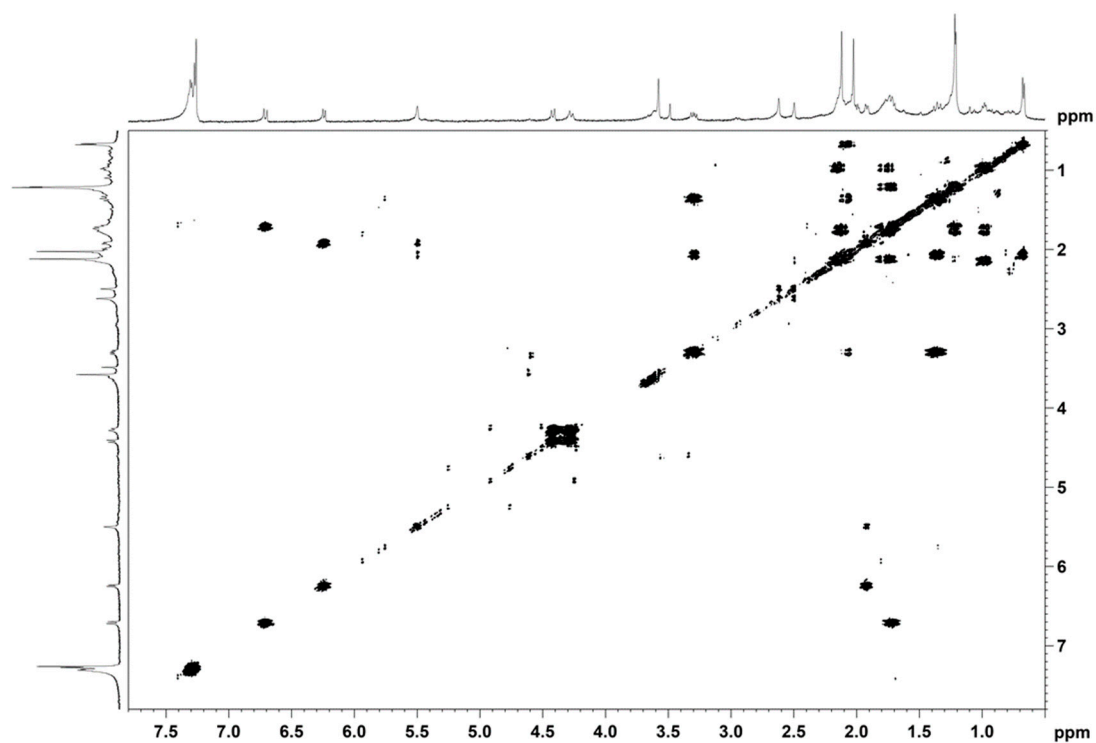

Figure S27.  $^1\text{H}$ - $^1\text{H}$  COSY spectrum of compound **3** in  $\text{CDCl}_3$

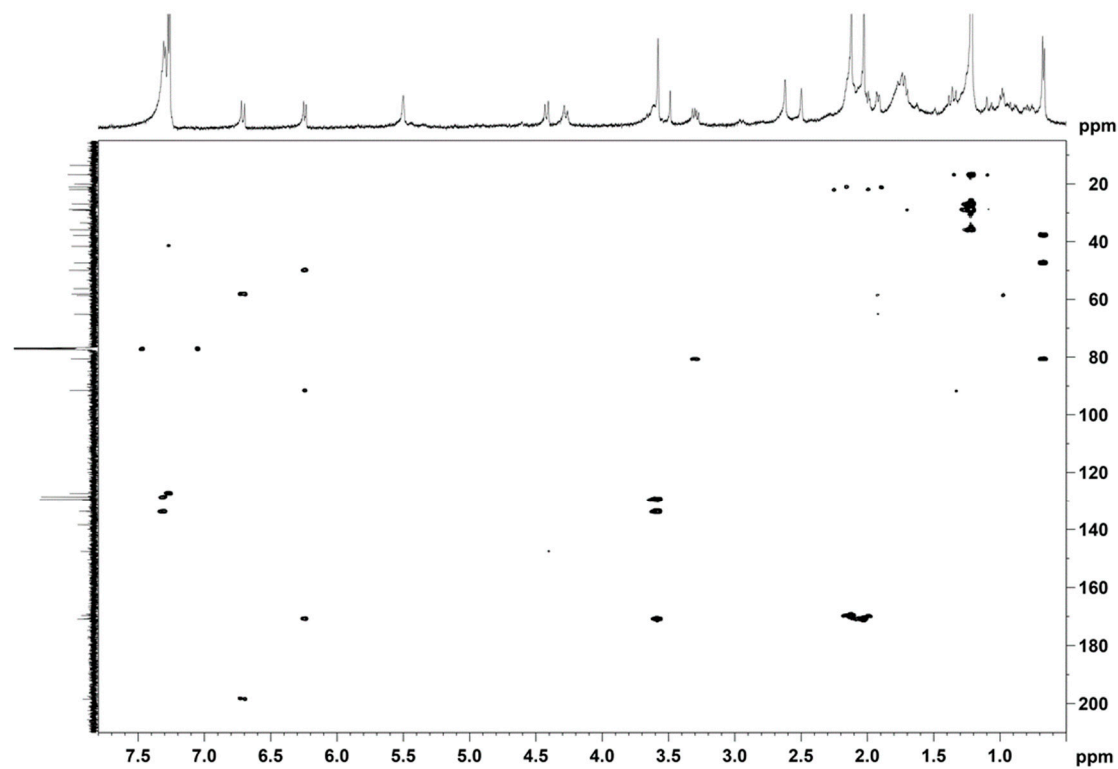

Figure S28. HMBC spectrum of compound **3** in  $\text{CDCl}_3$



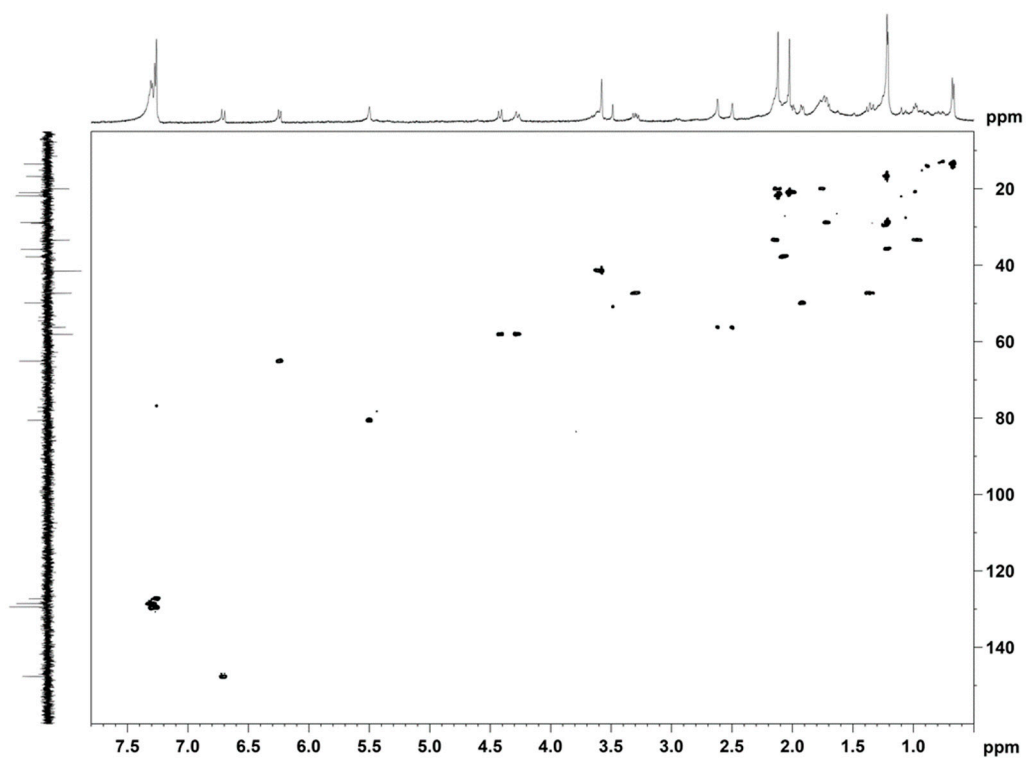

Figure S29. HSQC spectrum of compound **3** in CDCl<sub>3</sub>

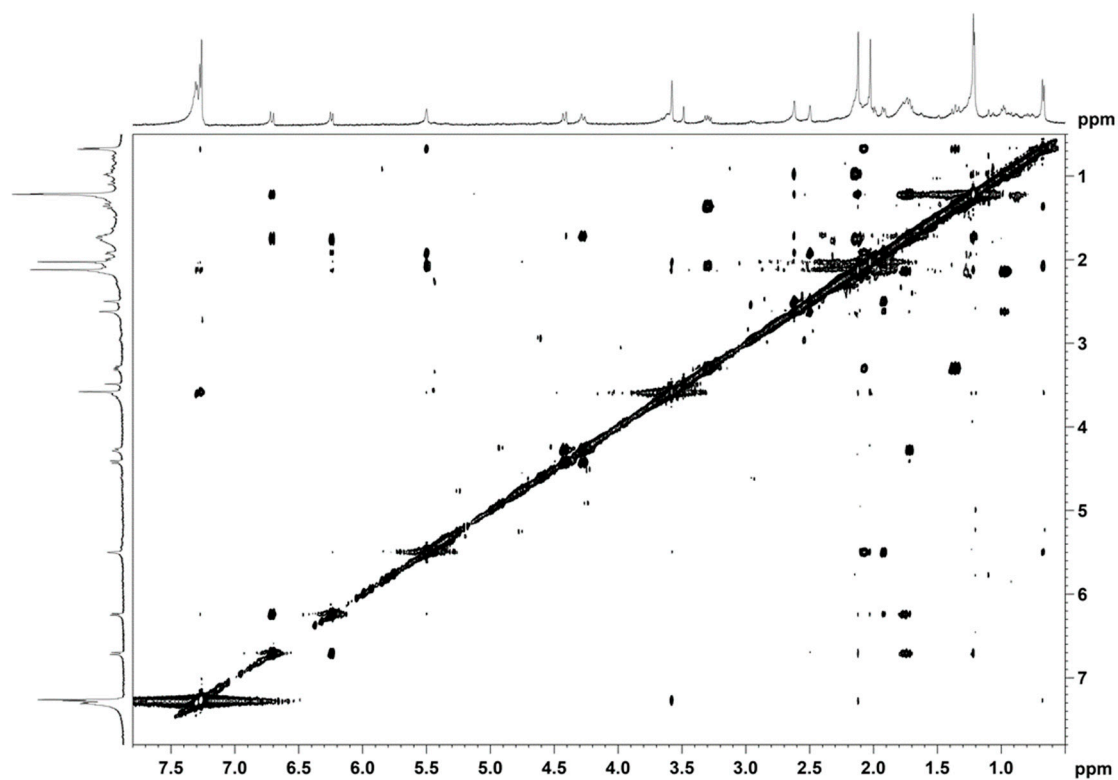

Figure S30. NOESY spectrum of compound **3** in CDCl<sub>3</sub>



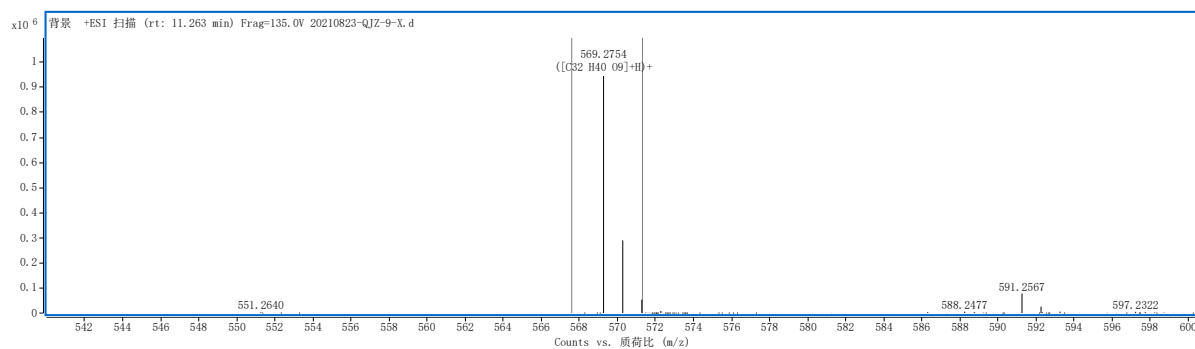

| Best | Formula(M)                                     | Ion Formula                                    | Tgt (m/z) | m/z      | Diff (ppm) |
|------|------------------------------------------------|------------------------------------------------|-----------|----------|------------|
| TRUE | C <sub>32</sub> H <sub>40</sub> O <sub>9</sub> | C <sub>32</sub> H <sub>41</sub> O <sub>9</sub> | 569.2745  | 569.2754 | 1.58       |

Figure S31. HR-ESI-MS spectrum of compound **4**

#### Rudolph Research Analytical

Monday, 10/11/2021

This sample was measured on an Autopol VI, serial number 90079, manufactured by Rudolph Research Analytical, Hackettstown, NJ.

LotID : QJZ-9  
Set Temperature : 20.0  
Temp Corr : OFF

| n    | Average   | Std.Dev.    | Maximum | Minimum |          |     |        |       |       |         |
|------|-----------|-------------|---------|---------|----------|-----|--------|-------|-------|---------|
| 6    | 70.000    | 0.4000      | 70.400  | 69.600  |          |     |        |       |       |         |
| S.No | Sample ID | Time        | Result  | Scale   | OR ° Arc | WLG | Lg.mm  | Conc. | Temp. | Comment |
| 1    | QJZ-9     | 10:32:39 AM | 69.600  | SR      | 0.087    | 589 | 100.00 | 0.125 | 20.2  |         |
| 2    | QJZ-9     | 10:32:47 AM | 69.600  | SR      | 0.087    | 589 | 100.00 | 0.125 | 20.1  |         |
| 3    | QJZ-9     | 10:32:54 AM | 69.600  | SR      | 0.087    | 589 | 100.00 | 0.125 | 20.1  |         |
| 4    | QJZ-9     | 10:33:01 AM | 70.400  | SR      | 0.088    | 589 | 100.00 | 0.125 | 20.1  |         |
| 5    | QJZ-9     | 10:33:09 AM | 70.400  | SR      | 0.088    | 589 | 100.00 | 0.125 | 20.0  |         |
| 6    | QJZ-9     | 10:33:20 AM | 70.400  | SR      | 0.088    | 589 | 100.00 | 0.125 | 20.0  |         |

Signature \_\_\_\_\_

Figure S32. OR value of compound **4** in MeOH

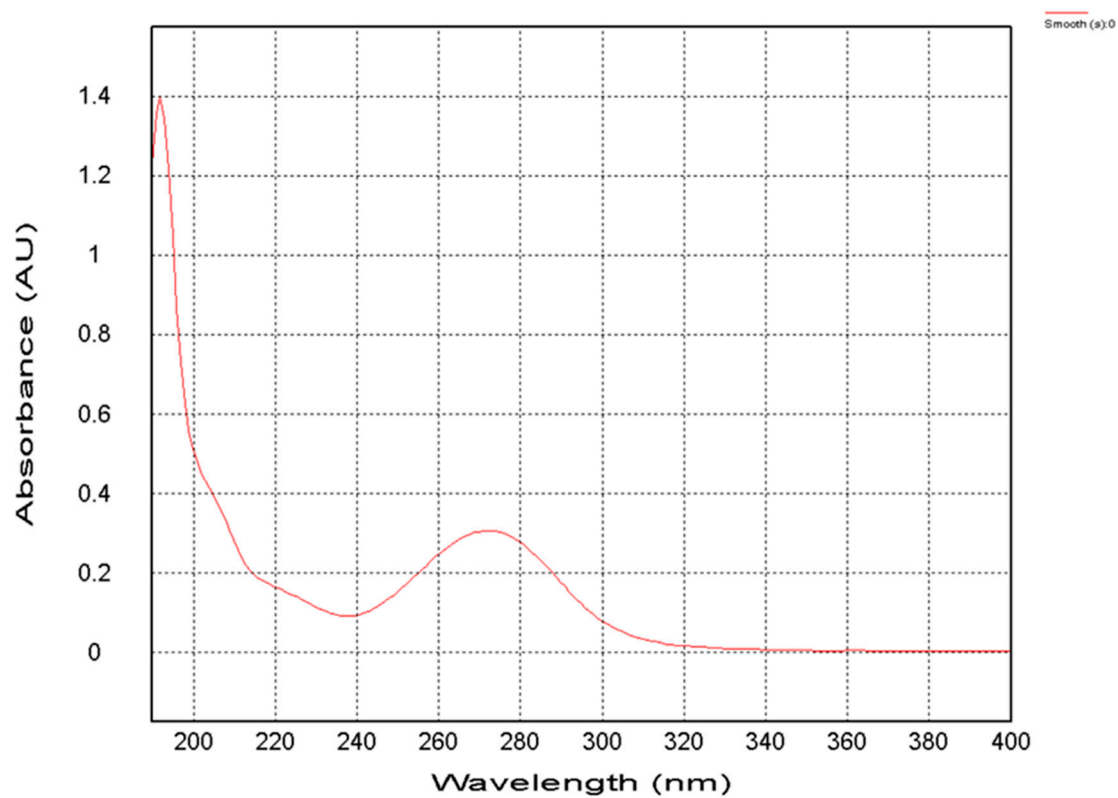

Figure S33. UV spectrum of compound 4 in MeOH

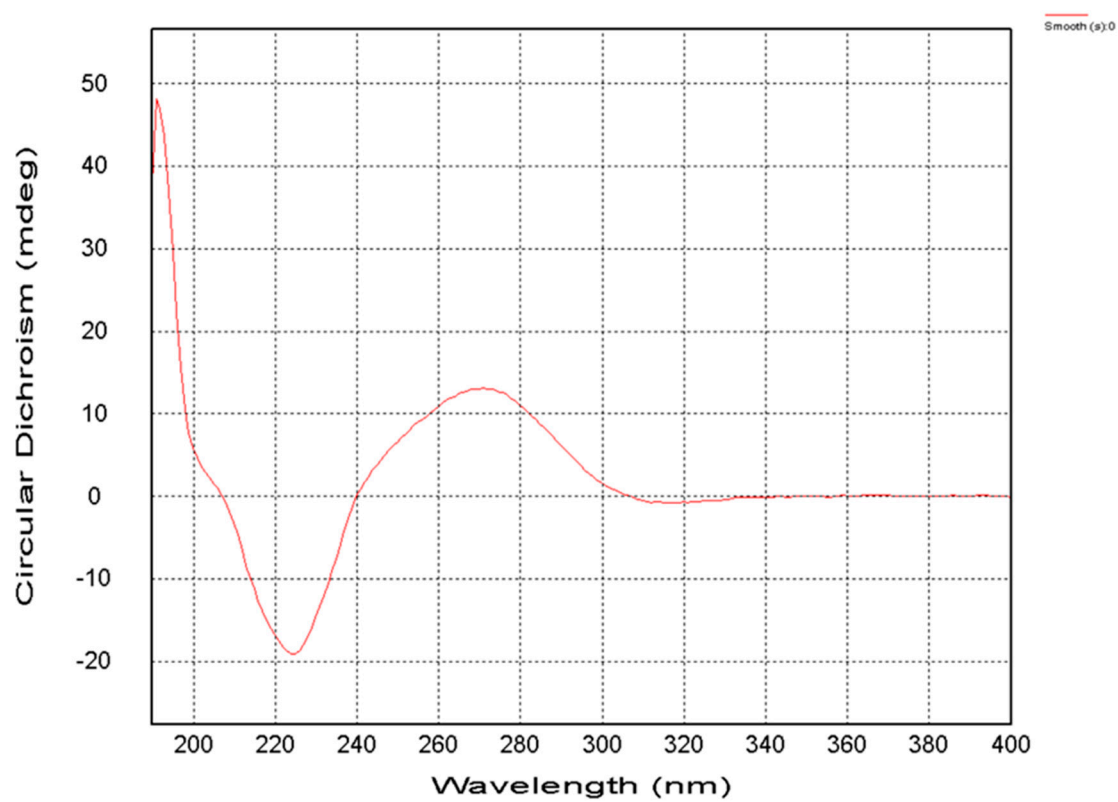

Figure S34. CD spectrum of compound 4 in MeOH

XSJ-QJZ-9 <sup>1</sup>H NMR (500 MHz, CDCl<sub>3</sub>)

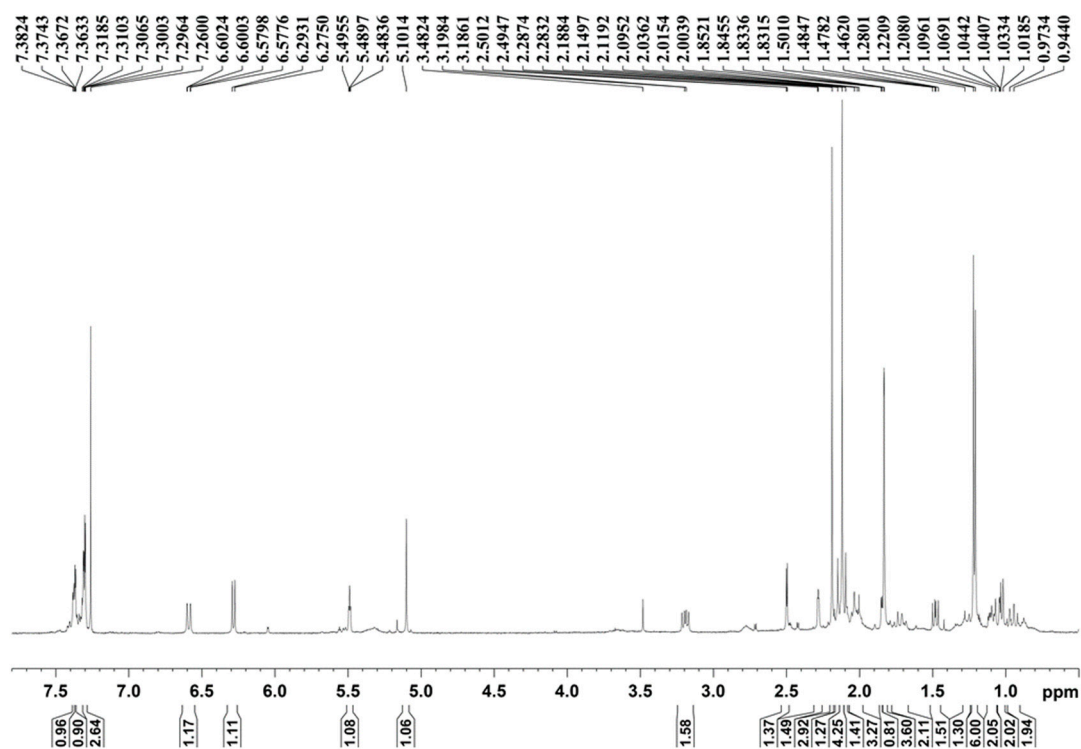

Figure S35. <sup>1</sup>H NMR spectrum of compound **4** in CDCl<sub>3</sub>

XSJ-QJZ-9 C13 and DEPT NMR (125 MHz, CDCl<sub>3</sub>)

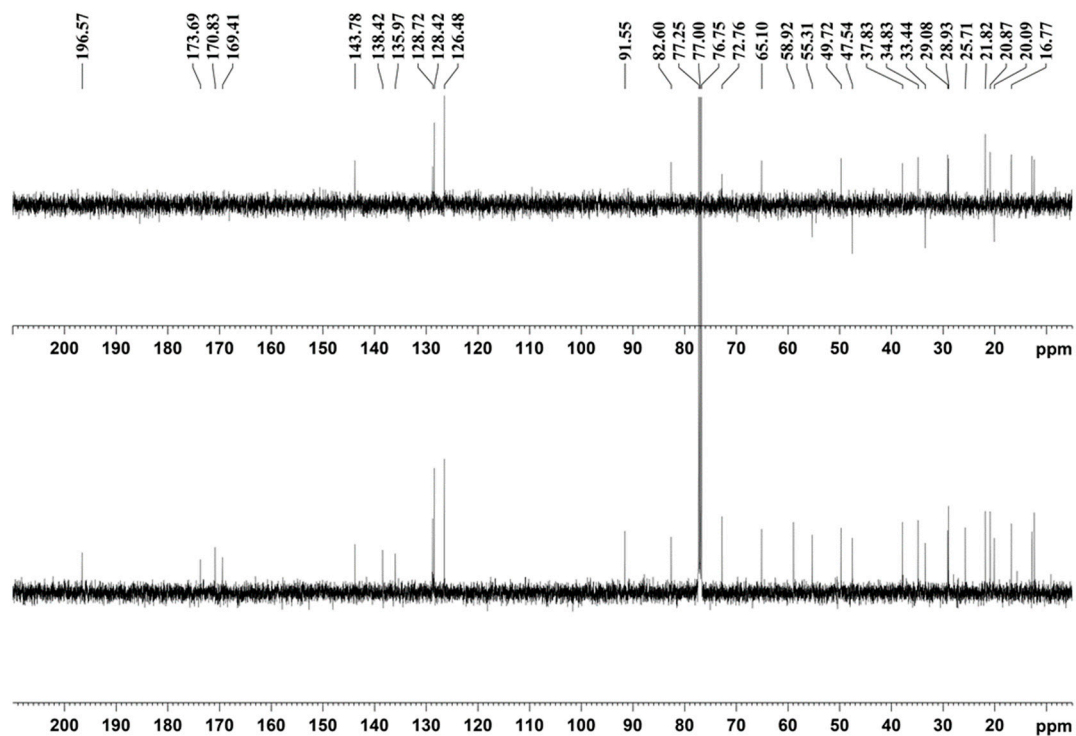

Figure S36. <sup>13</sup>C NMR and DEPT spectrum of compound **4** in CDCl<sub>3</sub>

XSJ-QJZ-9 1H 1H COSY

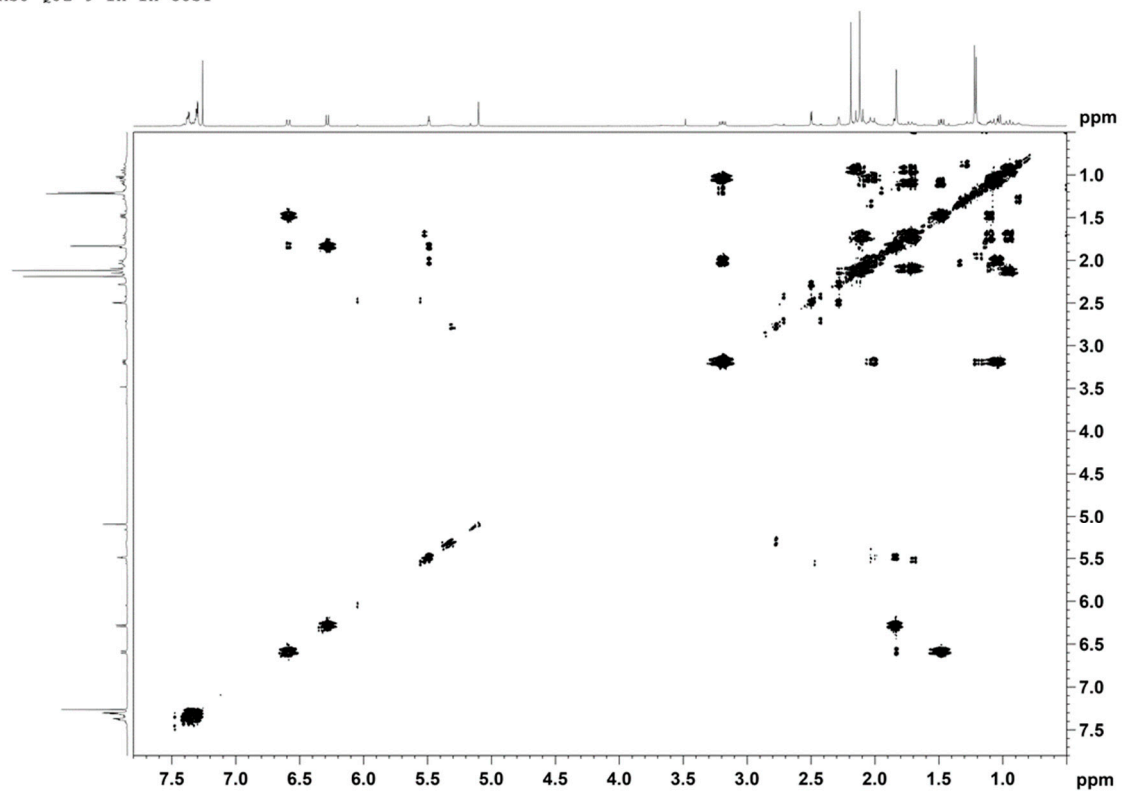

Figure S37. <sup>1</sup>H-<sup>1</sup>H COSY spectrum of compound **4** in CDCl<sub>3</sub>

XSJ-QJZ-9 HMBC

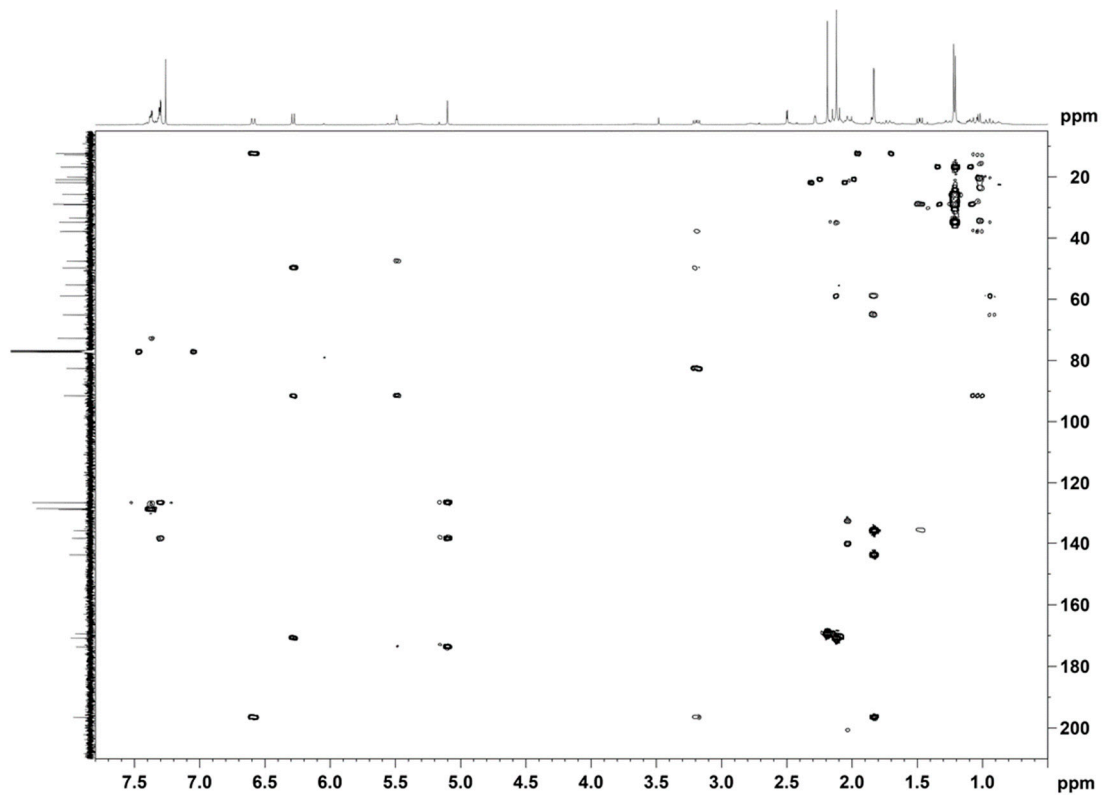

Figure S38. HMBC spectrum of compound **4** in CDCl<sub>3</sub>

XSJ-QJZ-9 HSQC

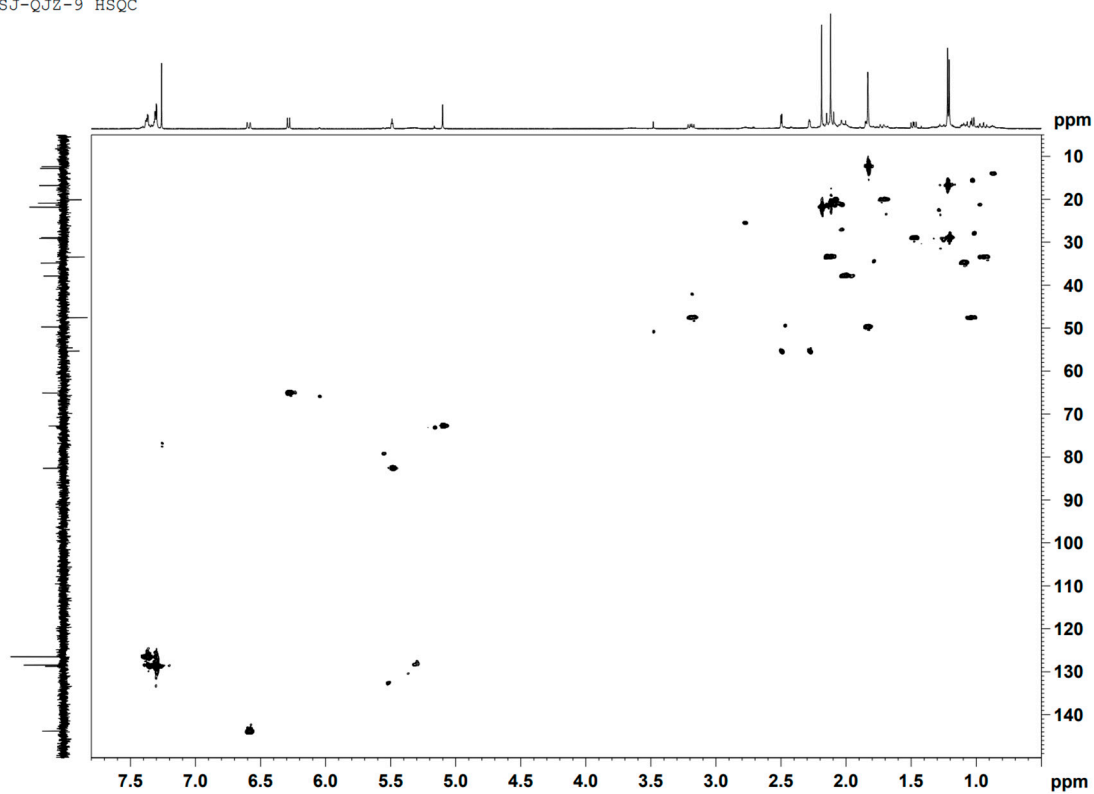

Figure S39. HSQC spectrum of compound **4** in CDCl<sub>3</sub>

XSJ-QJZ-9 NOESY

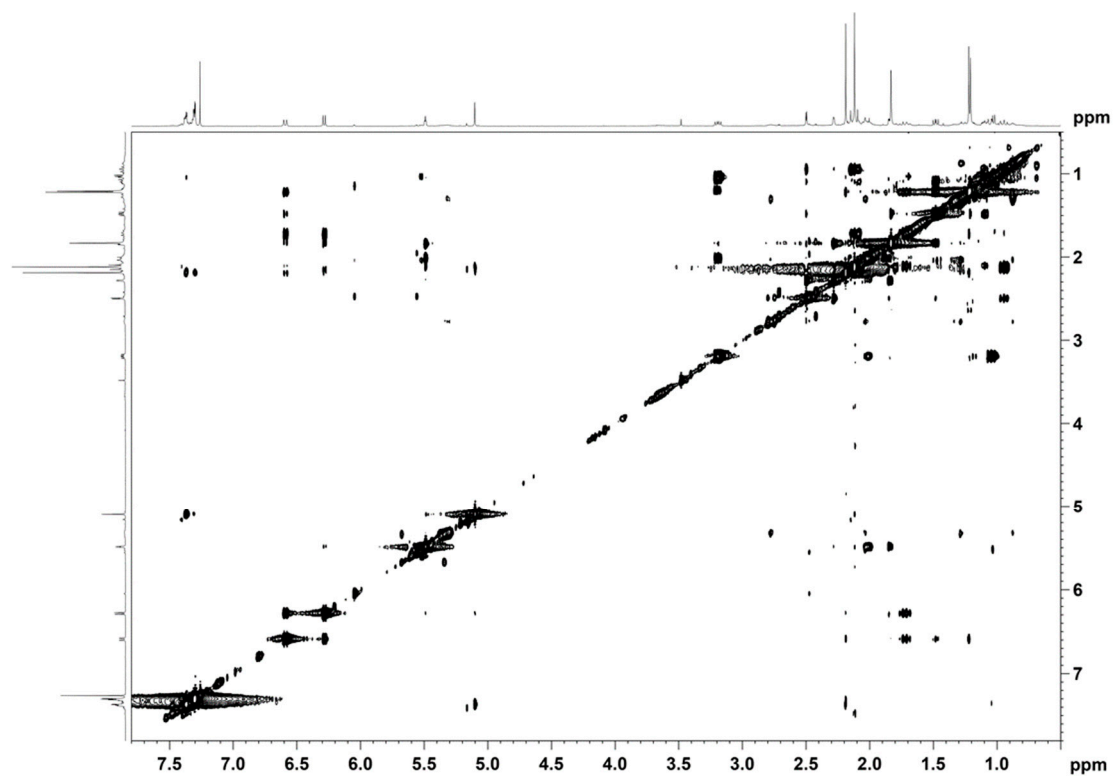

Figure S40. NOESY spectrum of compound **4** in CDCl<sub>3</sub>

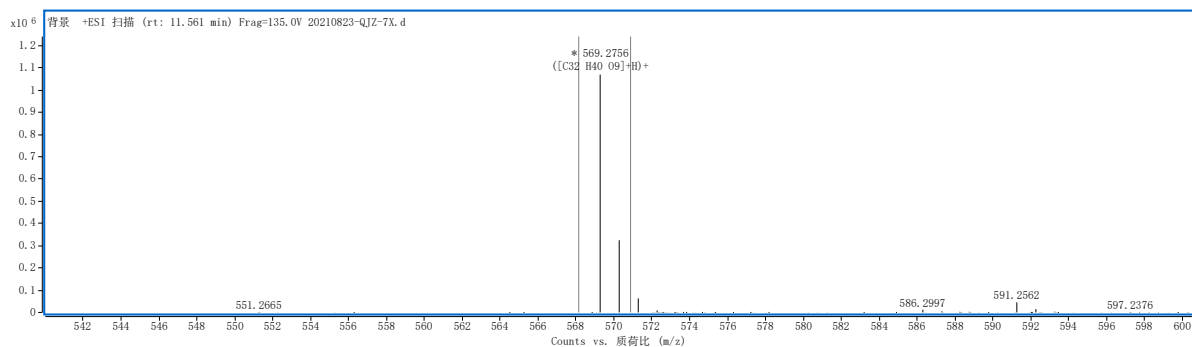

| Best | Formula(M)                                     | Ion Formula                                    | Tgt (m/z) | m/z      | Diff (ppm) |
|------|------------------------------------------------|------------------------------------------------|-----------|----------|------------|
| TRUE | C <sub>32</sub> H <sub>40</sub> O <sub>9</sub> | C <sub>32</sub> H <sub>41</sub> O <sub>9</sub> | 569.2745  | 569.2756 | 1.93       |

Figure S41. HR-ESI-MS spectrum of compound **5**

#### Rudolph Research Analytical

Monday, 10/11/2021

This sample was measured on an Autopol VI, serial number 90079, manufactured by Rudolph Research Analytical, Hackettstown, NJ.

LotID : QJZ-7  
Set Temperature : 20.0  
Temp Corr : OFF

| n    | Average   | Std.Dev.    | Maximum | Minimum |          |     |        |       |       |         |
|------|-----------|-------------|---------|---------|----------|-----|--------|-------|-------|---------|
| 6    | 112.654   | 0.4365      | 112.963 | 112.037 |          |     |        |       |       |         |
| S.No | Sample ID | Time        | Result  | Scale   | OR ° Arc | WLG | Lg.mm  | Conc. | Temp. | Comment |
| 1    | QJZ-7     | 10:58:17 AM | 112.037 | SR      | 0.121    | 589 | 100.00 | 0.108 | 20.1  |         |
| 2    | QJZ-7     | 10:58:25 AM | 112.037 | SR      | 0.121    | 589 | 100.00 | 0.108 | 20.1  |         |
| 3    | QJZ-7     | 10:58:32 AM | 112.963 | SR      | 0.122    | 589 | 100.00 | 0.108 | 20.1  |         |
| 4    | QJZ-7     | 10:58:40 AM | 112.963 | SR      | 0.122    | 589 | 100.00 | 0.108 | 20.0  |         |
| 5    | QJZ-7     | 10:58:47 AM | 112.963 | SR      | 0.122    | 589 | 100.00 | 0.108 | 20.0  |         |
| 6    | QJZ-7     | 10:58:54 AM | 112.963 | SR      | 0.122    | 589 | 100.00 | 0.108 | 20.0  |         |

Signature

Figure S42. OR value of compound **5** in MeOH

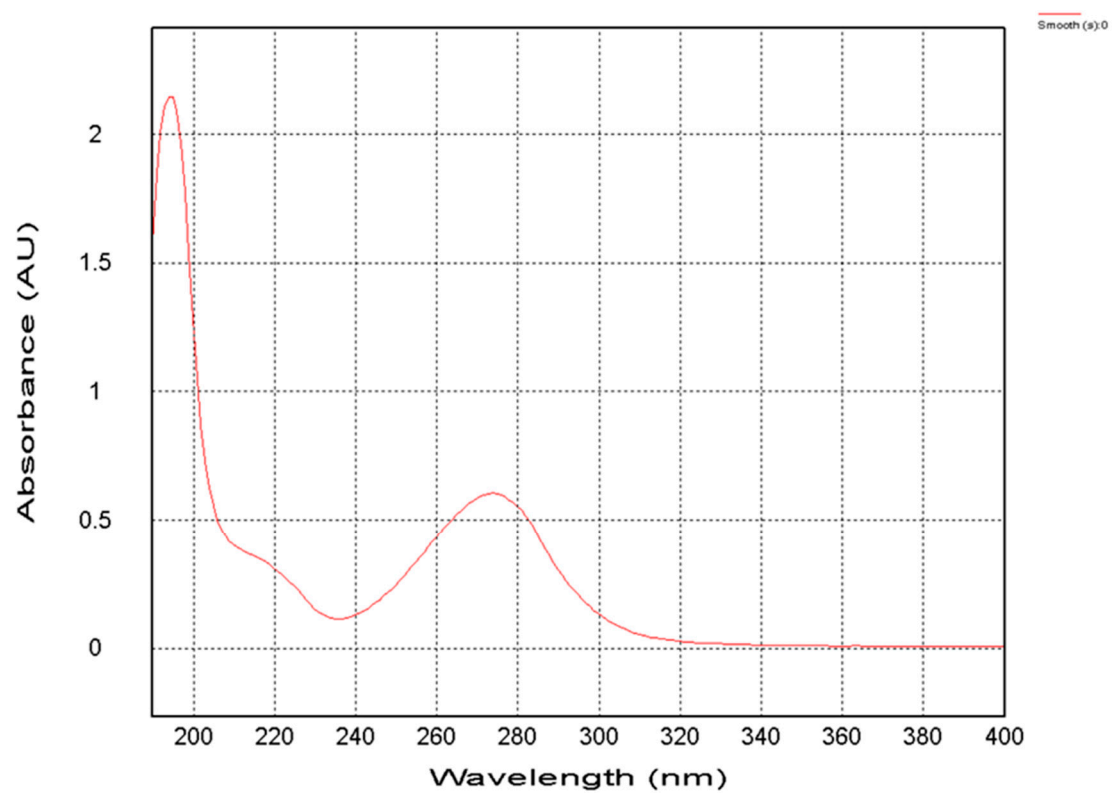

Figure S43. UV spectrum of compound **5** in MeOH

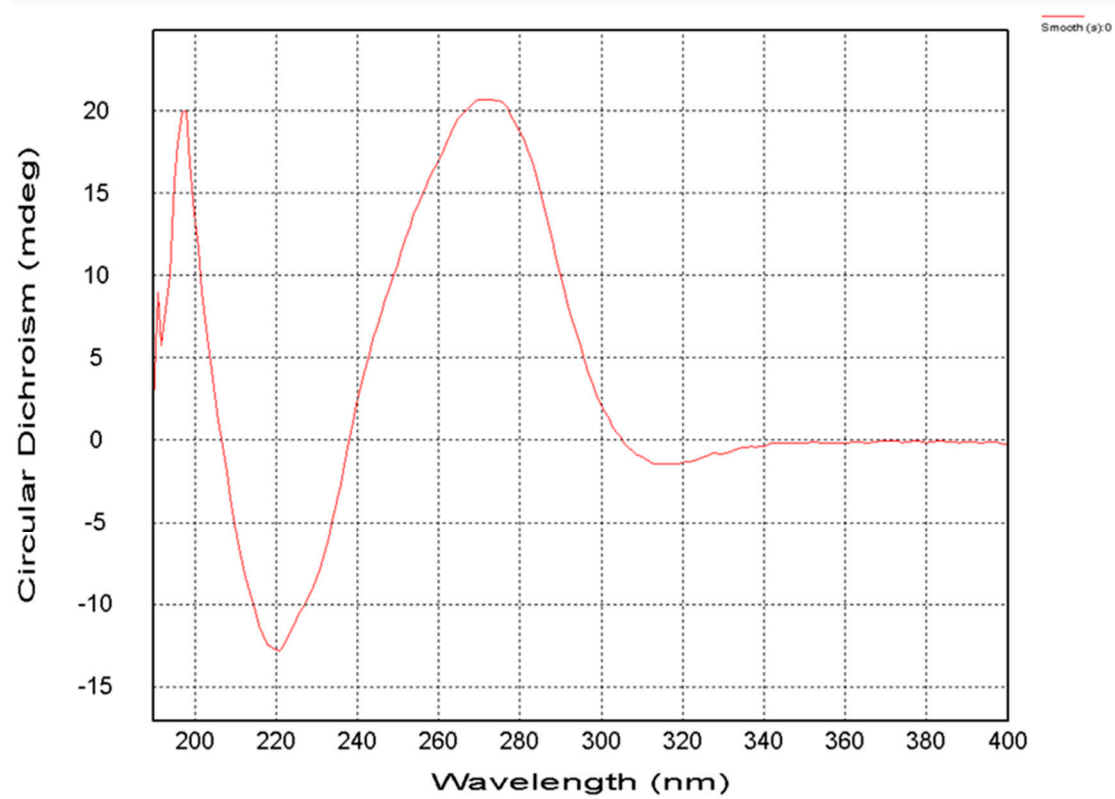

Figure S44. CD spectrum of compound **5** in MeOH



XSJ-QJZ-7  $^1\text{H}$  NMR (500 MHz,  $\text{CDCl}_3$ )

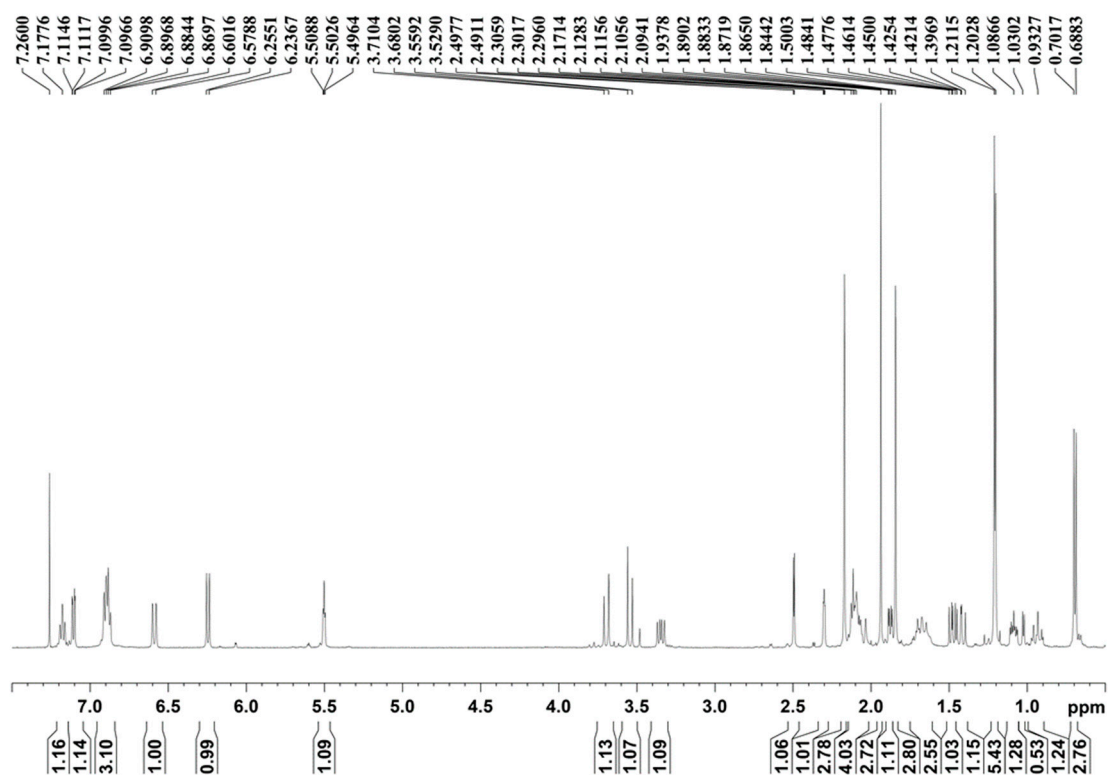

Figure S45.  $^1\text{H}$  NMR spectrum of compound **5** in  $\text{CDCl}_3$

XSJ-QJZ-7  $^{13}\text{C}$  and DEPT NMR (125 MHz,  $\text{CDCl}_3$ )

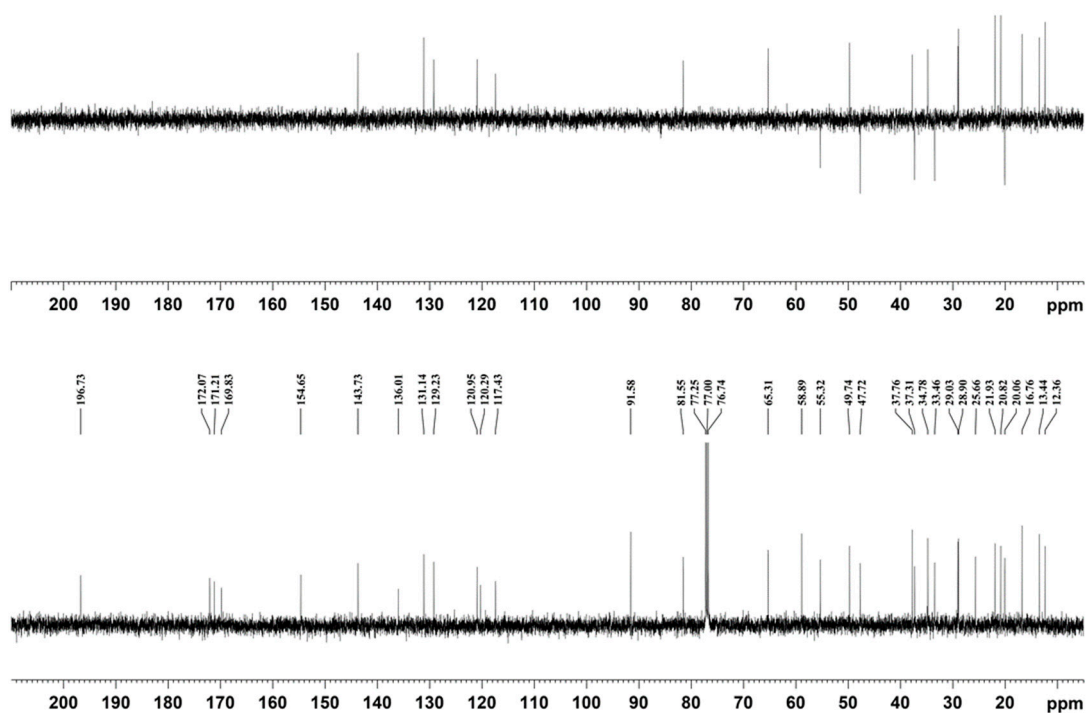

Figure S46.  $^{13}\text{C}$  NMR and DEPT spectrum of compound **5** in  $\text{CDCl}_3$



XSJ-QJZ-7  $^1\text{H}$   $^1\text{H}$  COSY

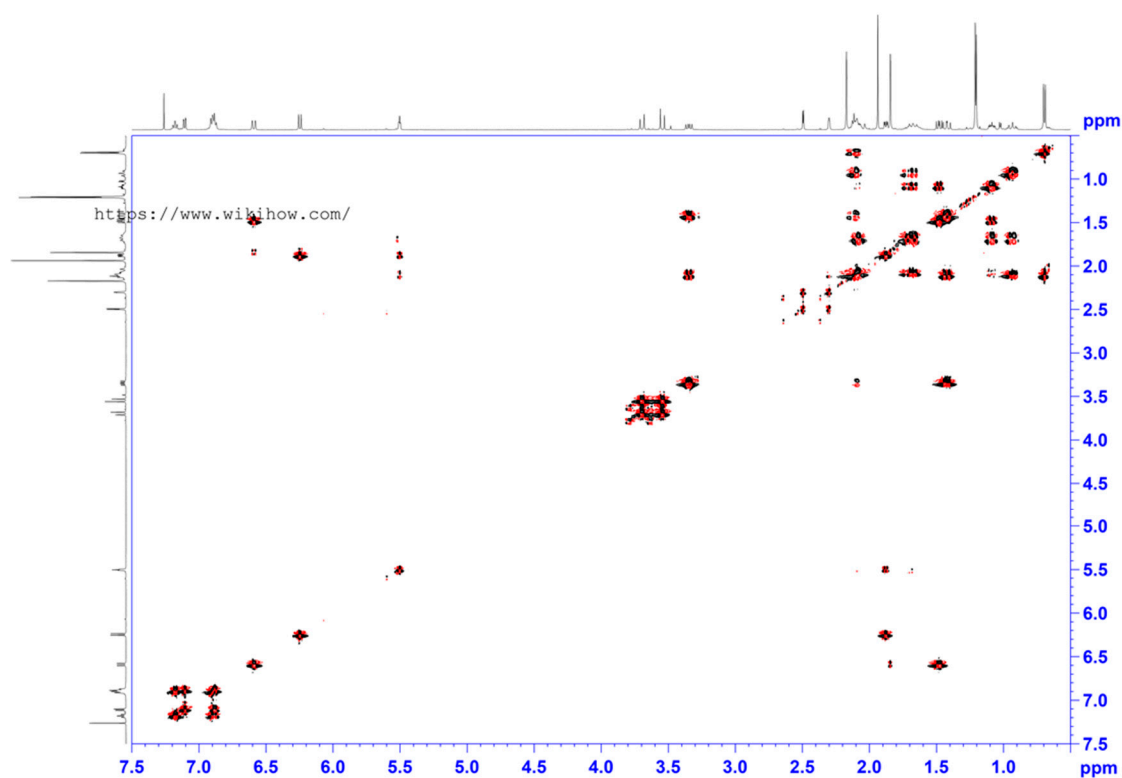

Figure S47.  $^1\text{H}$ - $^1\text{H}$  COSY spectrum of compound **5** in  $\text{CDCl}_3$

XSJ-QJZ-7 HMBC

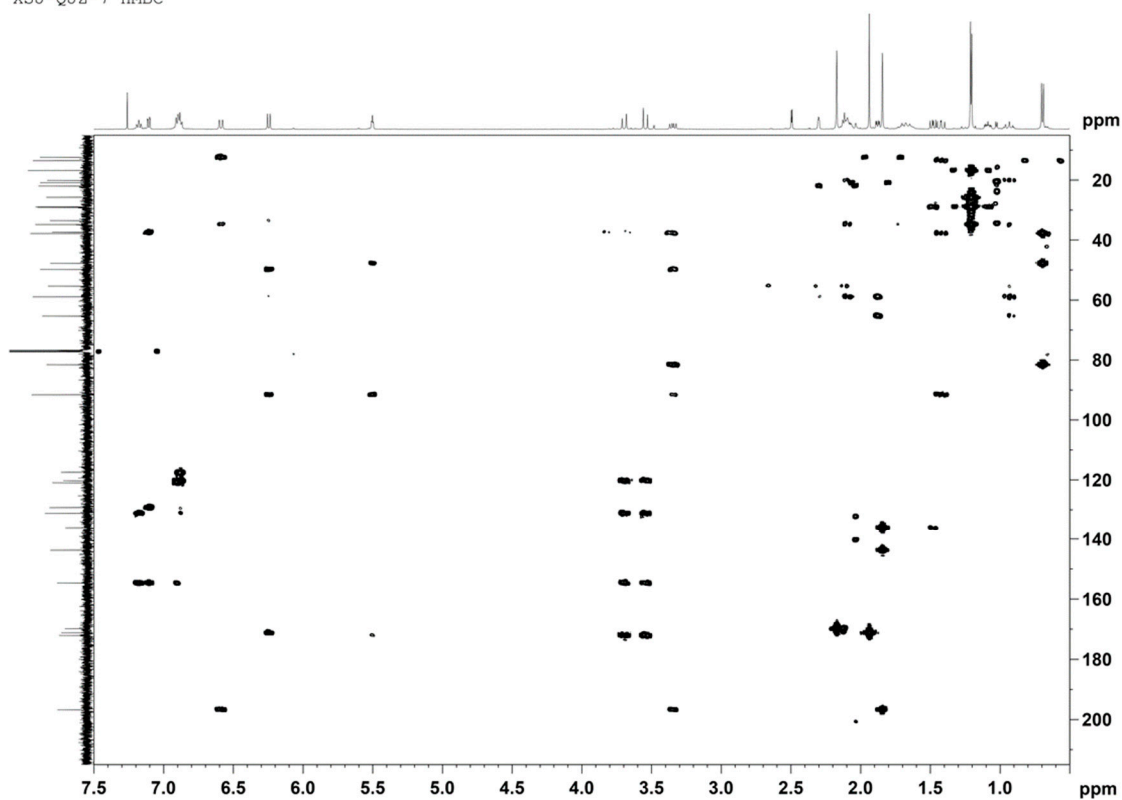

Figure S48. HMBC spectrum of compound **5** in  $\text{CDCl}_3$

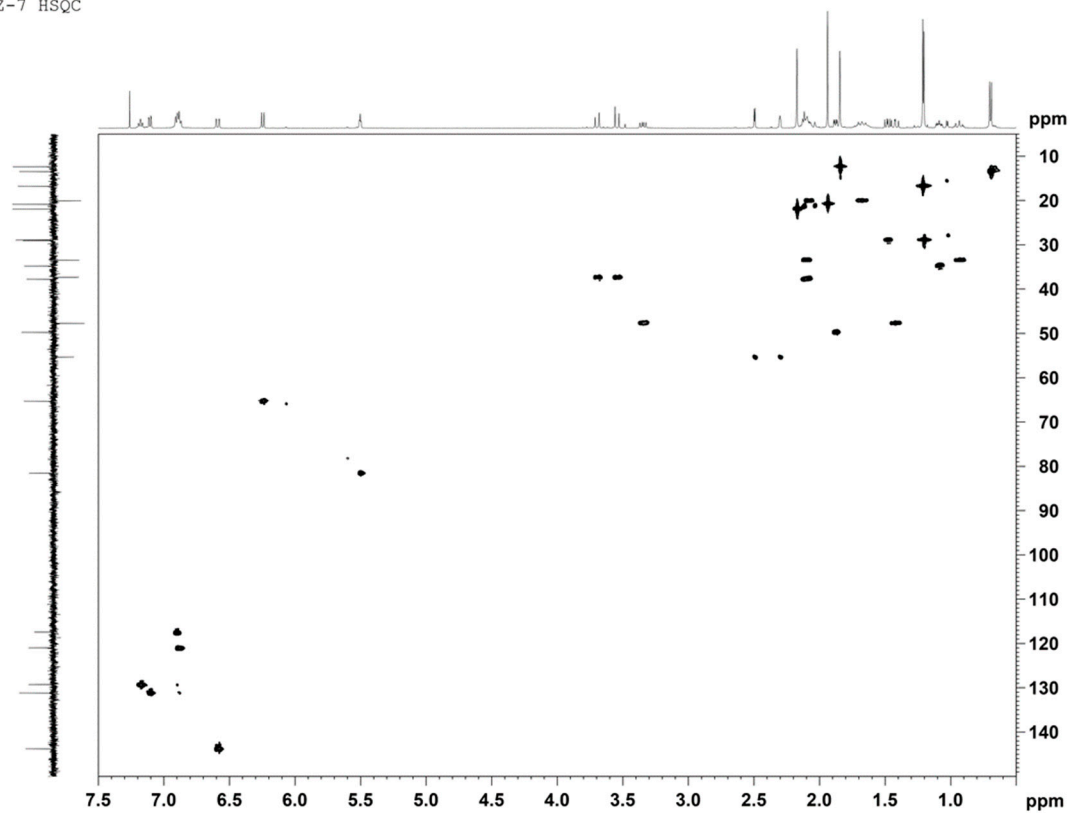Figure S49. HSQC spectrum of compound **5** in CDCl<sub>3</sub>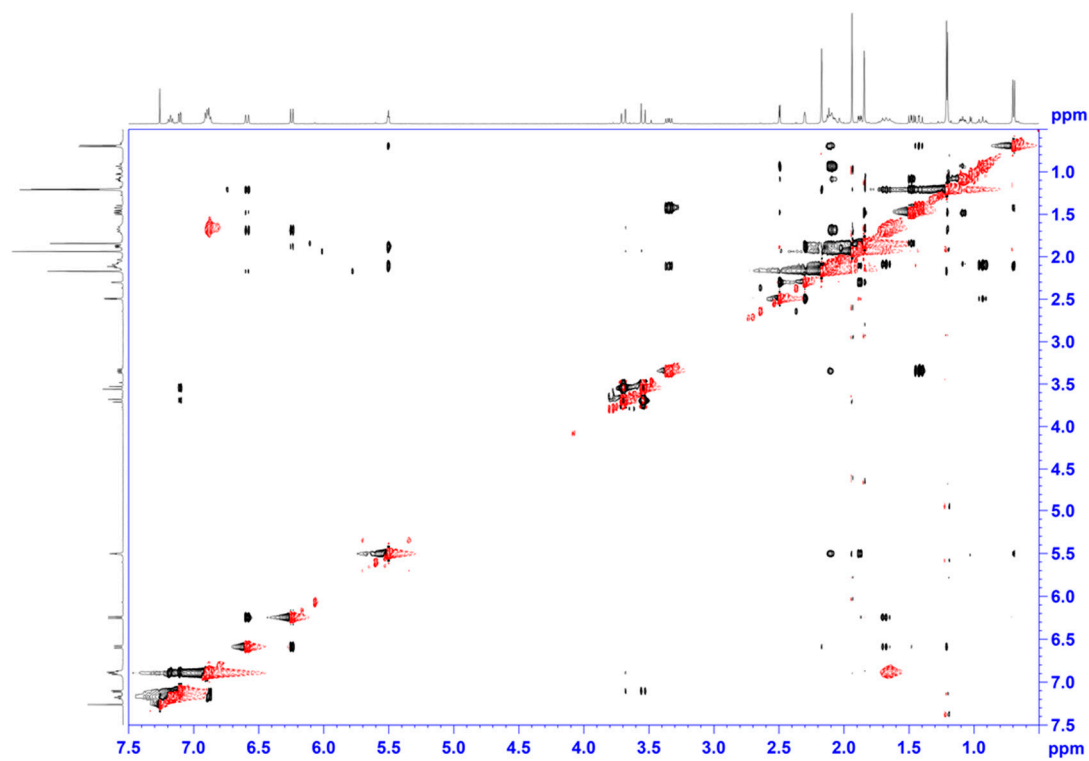Figure S50. NOESY spectrum of compound **5** in CDCl<sub>3</sub>

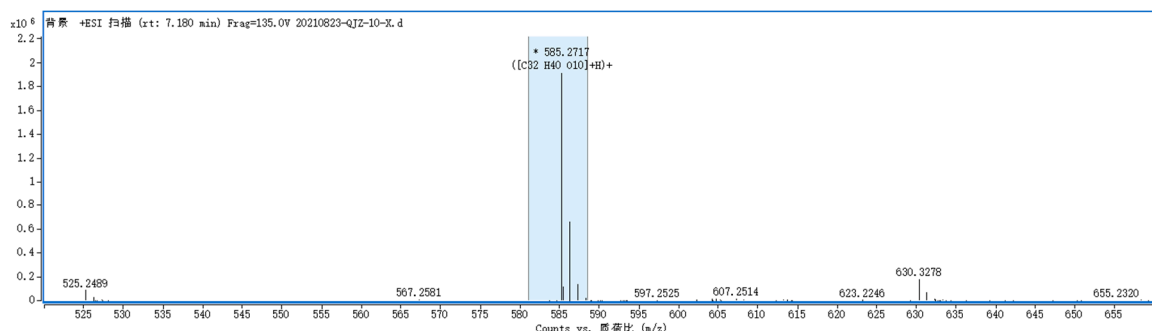

| Best | Formula(M)                                      | Ion Formula                                     | Tgt (m/z) | m/z      | Diff (ppm) |
|------|-------------------------------------------------|-------------------------------------------------|-----------|----------|------------|
| TRUE | C <sub>32</sub> H <sub>40</sub> O <sub>10</sub> | C <sub>32</sub> H <sub>41</sub> O <sub>10</sub> | 585.2694  | 585.2717 | 3.93       |

Figure S51. HR-ESI-MS spectrum of compound **6**

#### Rudolph Research Analytical

Monday, 10/11/2021

This sample was measured on an Autopol VI, serial number 90079, manufactured by Rudolph Research Analytical, Hackettstown, NJ.

LotID : QJZ-10  
Set Temperature : 20.0  
Temp Corr : OFF

| n    | Average   | Std.Dev.    | Maximum | Minimum |          |     |        |       |       |         |
|------|-----------|-------------|---------|---------|----------|-----|--------|-------|-------|---------|
| 6    | 87.143    | 0.4760      | 87.619  | 86.667  |          |     |        |       |       |         |
| S.No | Sample ID | Time        | Result  | Scale   | OR ° Arc | WLG | Lg.mm  | Conc. | Temp. | Comment |
| 1    | QJZ-10    | 10:17:24 AM | 86.667  | SR      | 0.091    | 589 | 100.00 | 0.105 | 20.3  |         |
| 2    | QJZ-10    | 10:17:32 AM | 86.667  | SR      | 0.091    | 589 | 100.00 | 0.105 | 20.2  |         |
| 3    | QJZ-10    | 10:17:39 AM | 87.619  | SR      | 0.092    | 589 | 100.00 | 0.105 | 20.2  |         |
| 4    | QJZ-10    | 10:17:47 AM | 86.667  | SR      | 0.091    | 589 | 100.00 | 0.105 | 20.2  |         |
| 5    | QJZ-10    | 10:17:54 AM | 87.619  | SR      | 0.092    | 589 | 100.00 | 0.105 | 20.1  |         |
| 6    | QJZ-10    | 10:18:02 AM | 87.619  | SR      | 0.092    | 589 | 100.00 | 0.105 | 20.1  |         |

Signature

Figure S52. OR value of compound **6** in MeOH

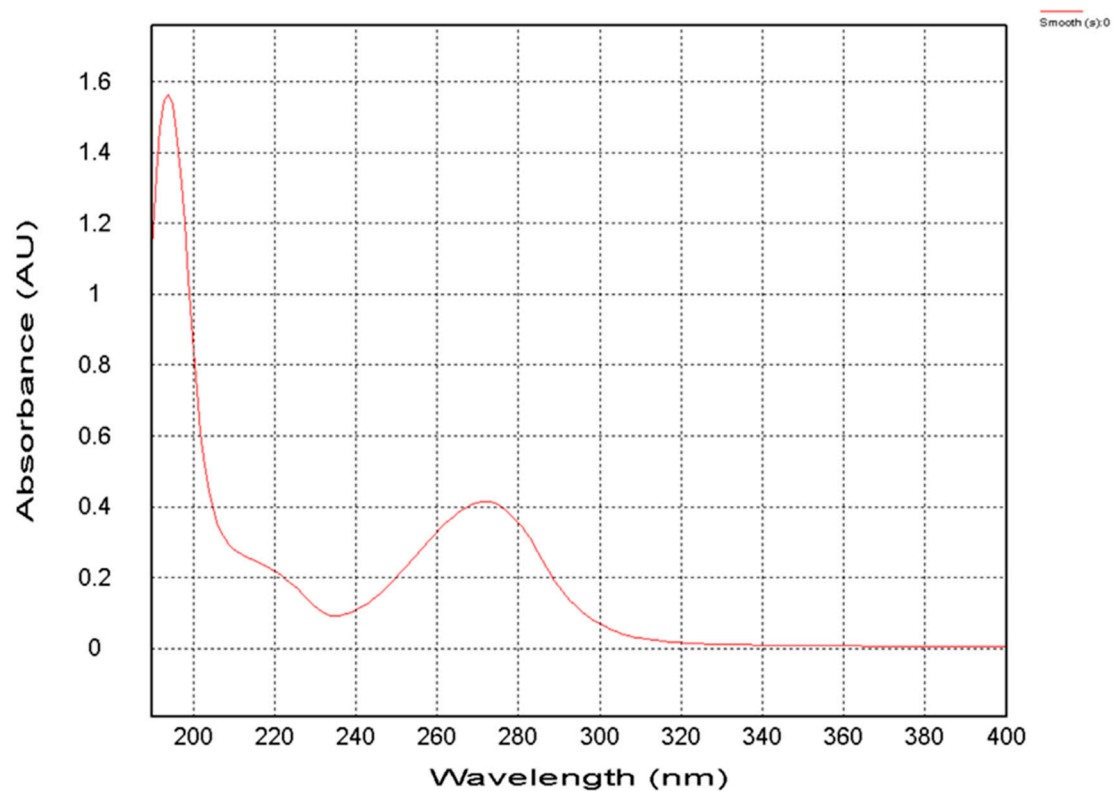

Figure S53. UV spectrum of compound **6** in MeOH

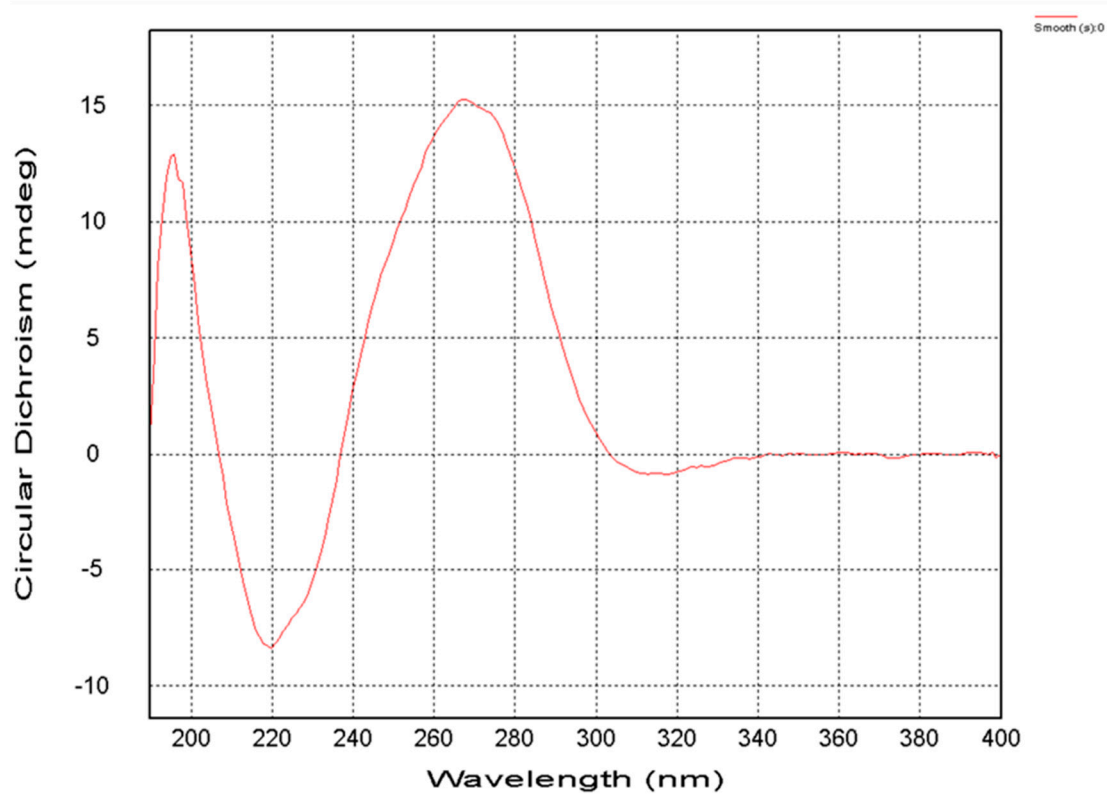

Figure S54. CD spectrum of compound **6** in MeOH

XSJ-QJZ-10  $^1\text{H}$  NMR (500 MHz,  $\text{CD}_3\text{COCD}_3$ )

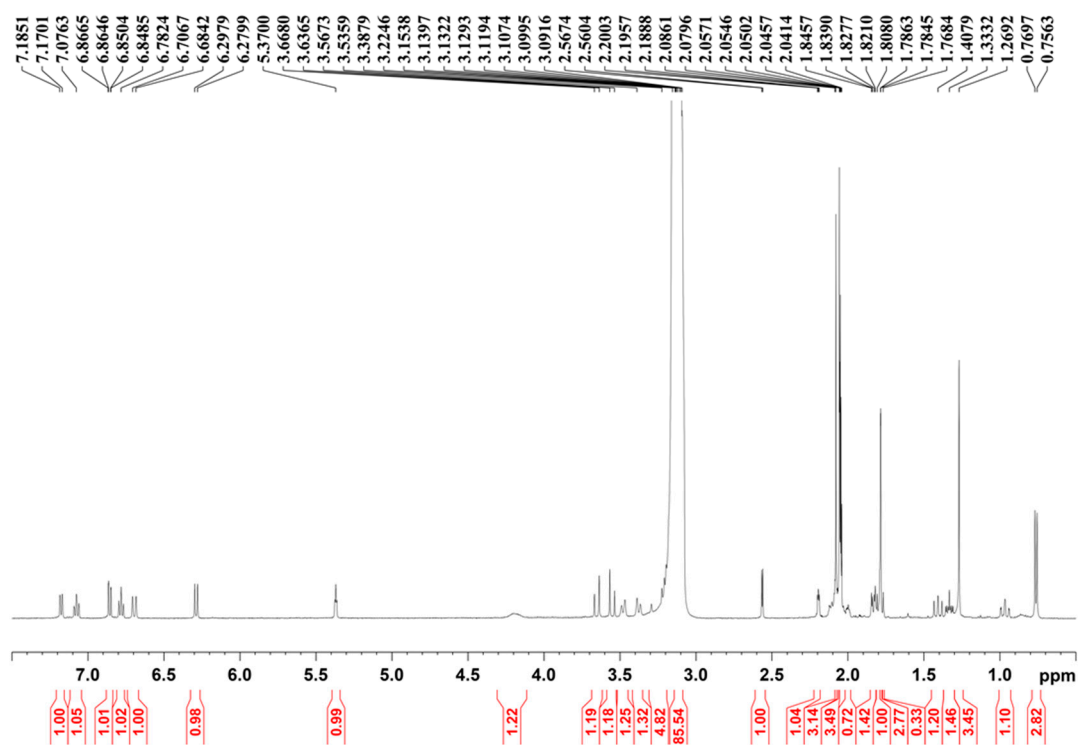

Figure S55.  $^1\text{H}$  NMR spectrum of compound **6** in  $\text{C}_3\text{D}_6\text{O}$

XSJ-QJZ-10  $^{13}\text{C}$  and DEPT NMR (125 MHz,  $\text{CD}_3\text{COCD}_3$ )

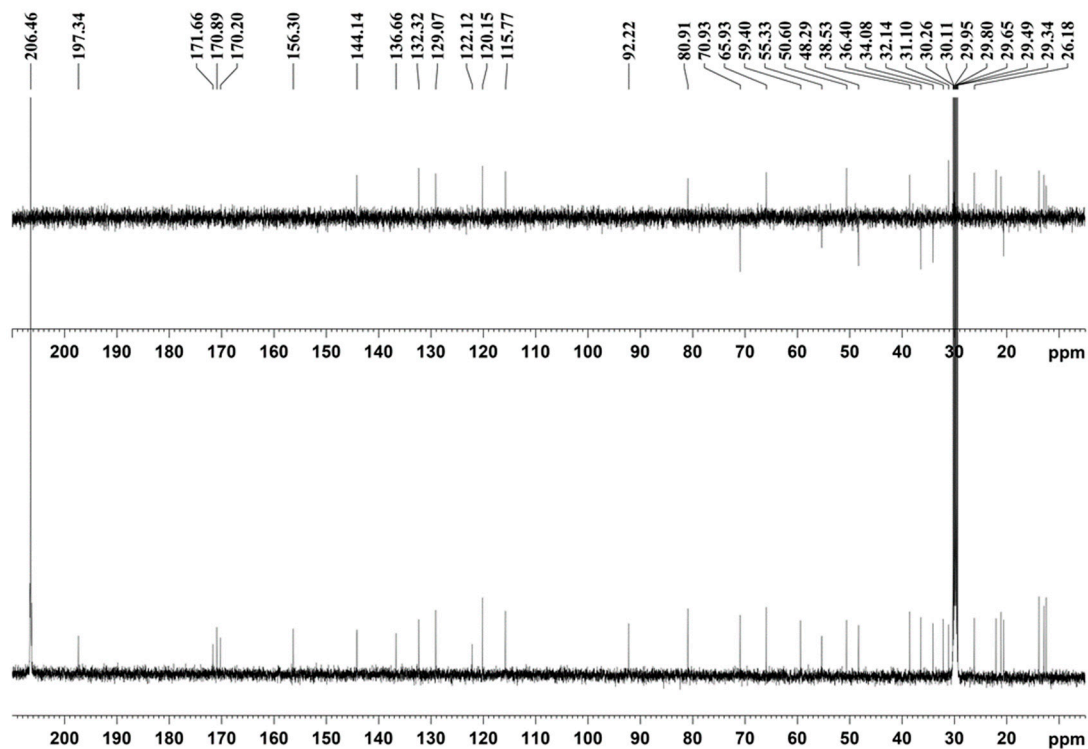

Figure S56.  $^{13}\text{C}$  NMR and DEPT spectrum of compound **6** in  $\text{C}_3\text{D}_6\text{O}$

XSJ-QJZ-10 1H 1H COSY

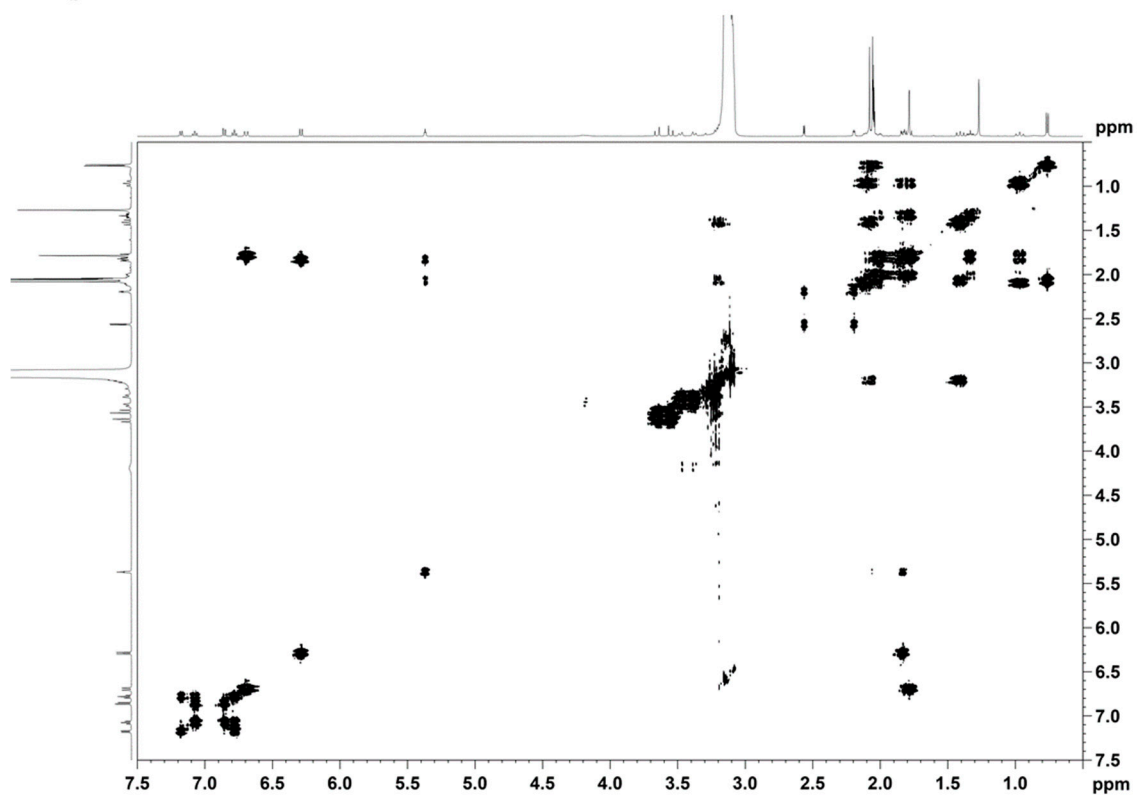

Figure S57.  $^1\text{H}$ - $^1\text{H}$  NMR spectrum of compound **6** in  $\text{C}_3\text{D}_6\text{O}$

XSJ-QJZ-10 HMBC

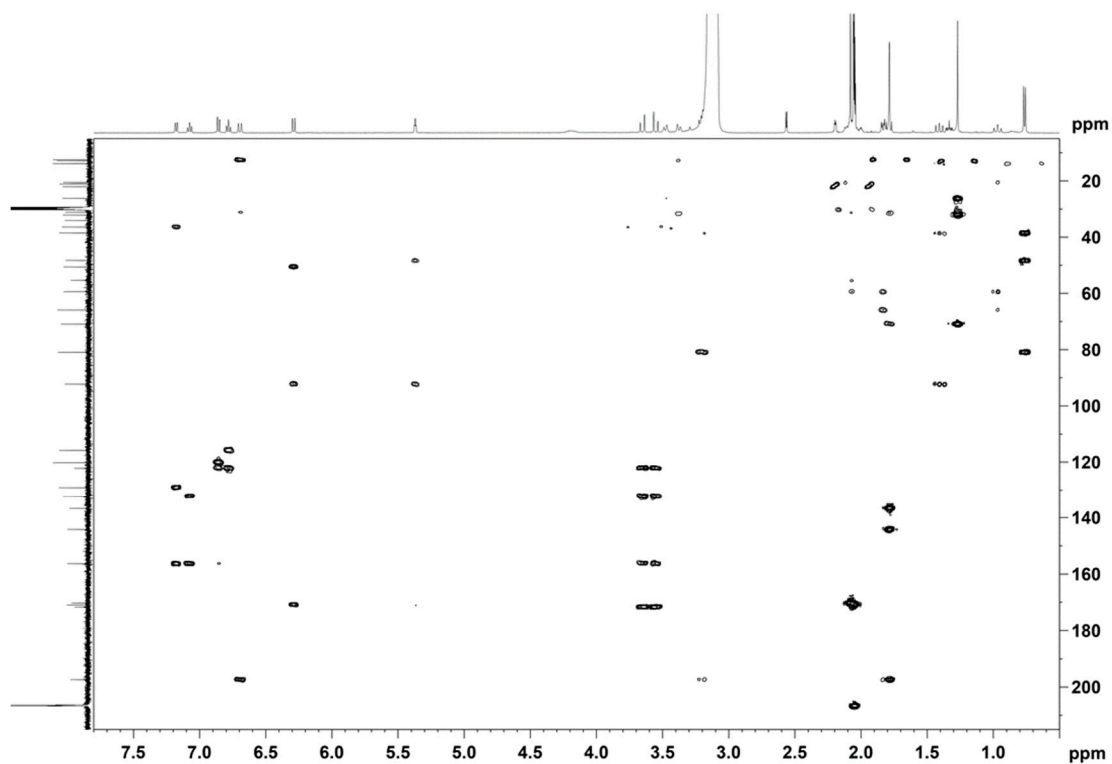

Figure S58. HMBC spectrum of compound **6** in  $\text{C}_3\text{D}_6\text{O}$

XSJ-QJZ-10 HSQC

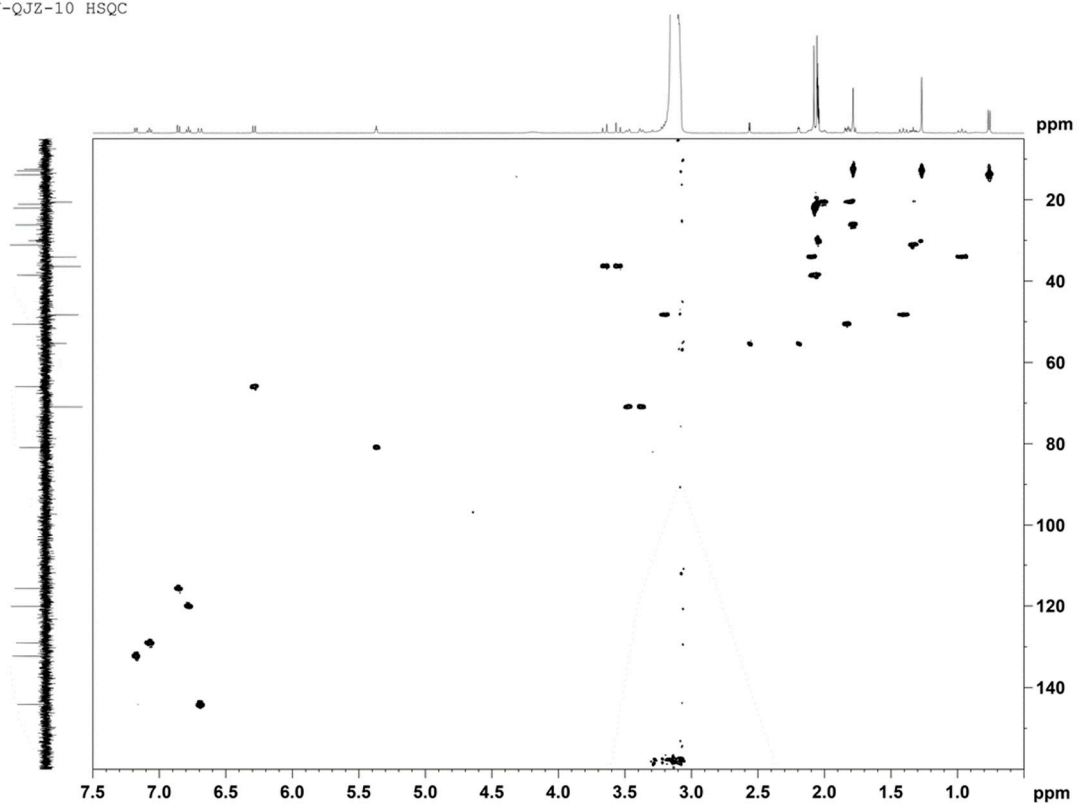

Figure S59. HSQC spectrum of compound **6** in C<sub>3</sub>D<sub>6</sub>O

XSJ-QJZ-10 NOESY

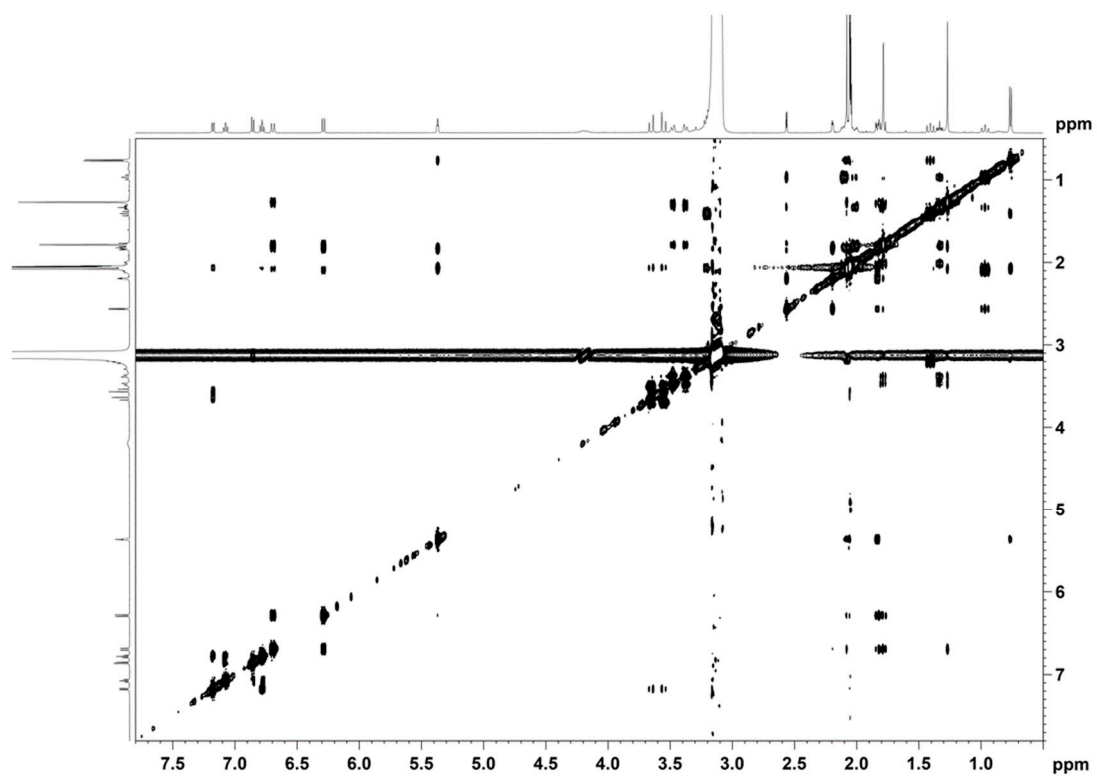

Figure S60. NOESY spectrum of compound **6** in C<sub>3</sub>D<sub>6</sub>O

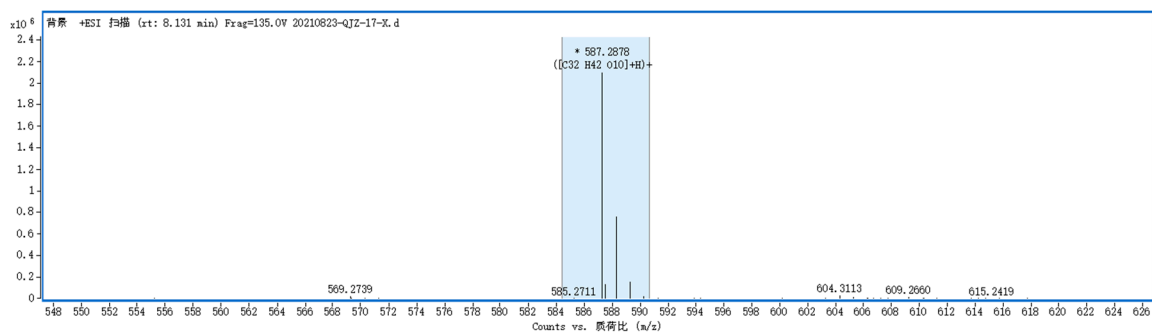

| Best | Formula(M)                                      | Ion Formula                                     | Tgt (m/z) | m/z      | Diff (ppm) |
|------|-------------------------------------------------|-------------------------------------------------|-----------|----------|------------|
| TRUE | C <sub>32</sub> H <sub>42</sub> O <sub>10</sub> | C <sub>32</sub> H <sub>43</sub> O <sub>10</sub> | 587.2851  | 587.2878 | 4.59       |

Figure S61. HR-ESI-MS spectrum of compound 7

#### Rudolph Research Analytical

Saturday, 10/09/2021

This sample was measured on an Autopol VI, serial number 90079, manufactured by Rudolph Research Analytical, Hackettstown, NJ.

LotID : QJZ-17  
Set Temperature : 20.0  
Temp Corr : OFF

| n    | Average   | Std.Dev.    | Maximum | Minimum |          |     |        |       |       |         |
|------|-----------|-------------|---------|---------|----------|-----|--------|-------|-------|---------|
| 6    | 60.000    | 0.0000      | 60.000  | 60.000  |          |     |        |       |       |         |
| S.No | Sample ID | Time        | Result  | Scale   | OR ° Arc | WLG | Lg.mm  | Conc. | Temp. | Comment |
| 1    | QJZ-17    | 04:36:50 PM | 60.000  | SR      | 0.102    | 589 | 100.00 | 0.170 | 19.7  |         |
| 2    | QJZ-17    | 04:36:57 PM | 60.000  | SR      | 0.102    | 589 | 100.00 | 0.170 | 19.7  |         |
| 3    | QJZ-17    | 04:37:05 PM | 60.000  | SR      | 0.102    | 589 | 100.00 | 0.170 | 19.7  |         |
| 4    | QJZ-17    | 04:37:12 PM | 60.000  | SR      | 0.102    | 589 | 100.00 | 0.170 | 19.7  |         |
| 5    | QJZ-17    | 04:37:20 PM | 60.000  | SR      | 0.102    | 589 | 100.00 | 0.170 | 19.8  |         |
| 6    | QJZ-17    | 04:37:27 PM | 60.000  | SR      | 0.102    | 589 | 100.00 | 0.170 | 19.8  |         |

Signature

Figure S62. OR value of compound 7 in MeOH



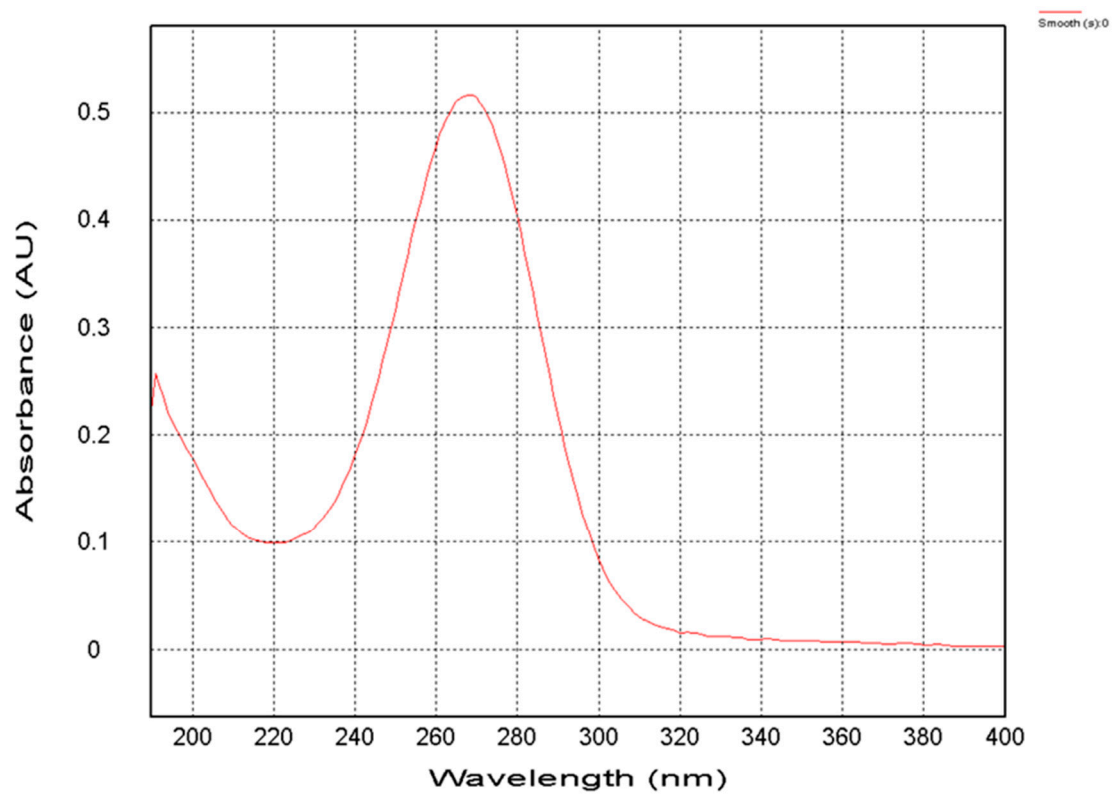

Figure S63. UV spectrum of compound 7 in MeOH

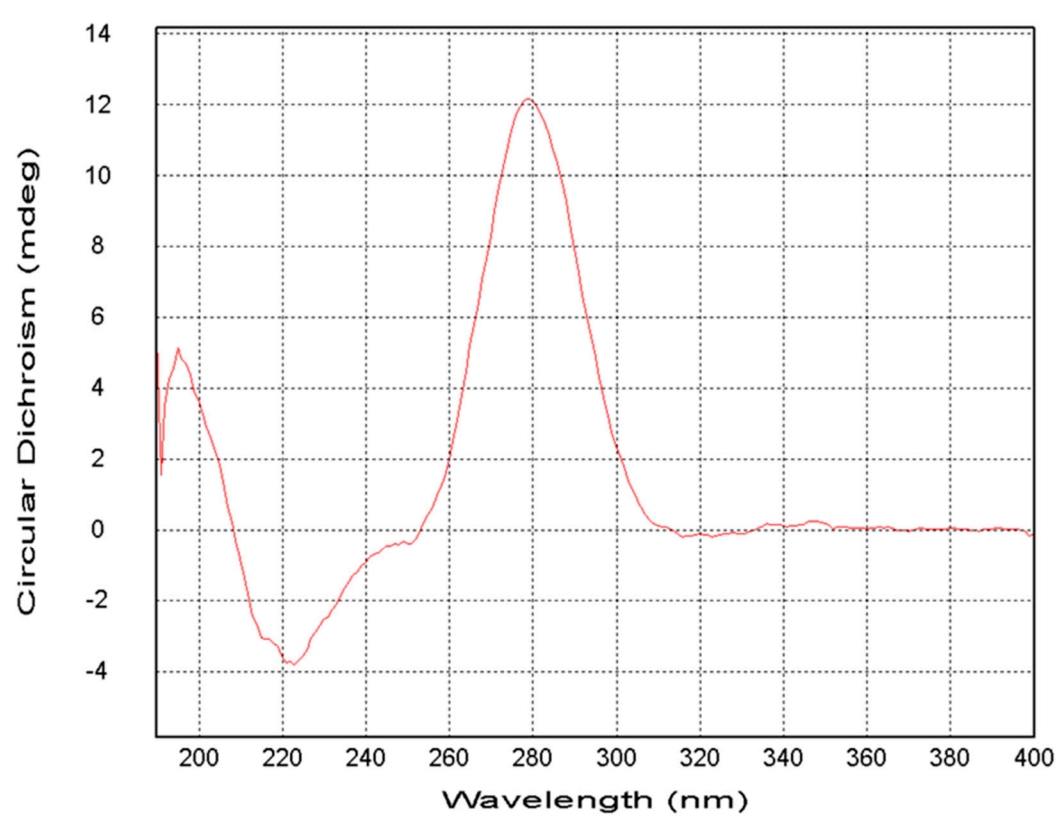

Figure S64. CD spectrum of compound 7 in MeOH

XSJ-QJZ-17  $^1\text{H}$  NMR (500 MHz,  $\text{CDCl}_3$ )

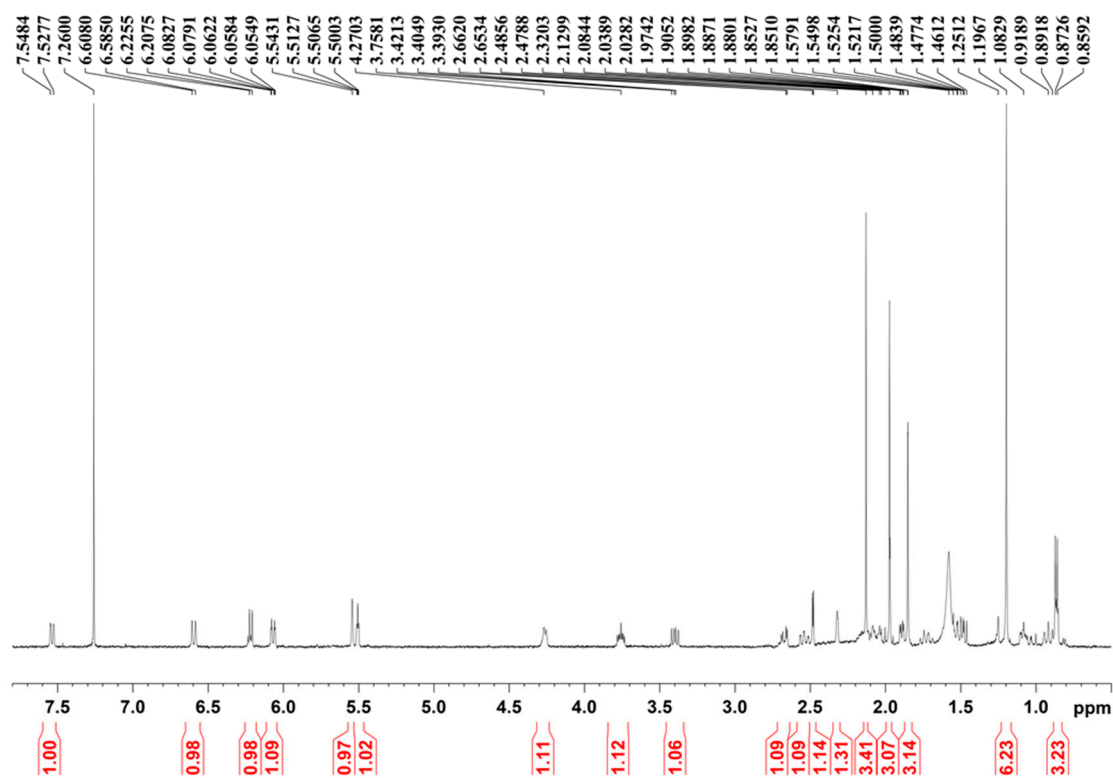

Figure S65.  $^1\text{H}$  NMR spectrum of compound 7 in  $\text{CDCl}_3$

XSJ-QJZ-17  $^{13}\text{C}$  and DEPT NMR (125 MHz,  $\text{CDCl}_3$ )

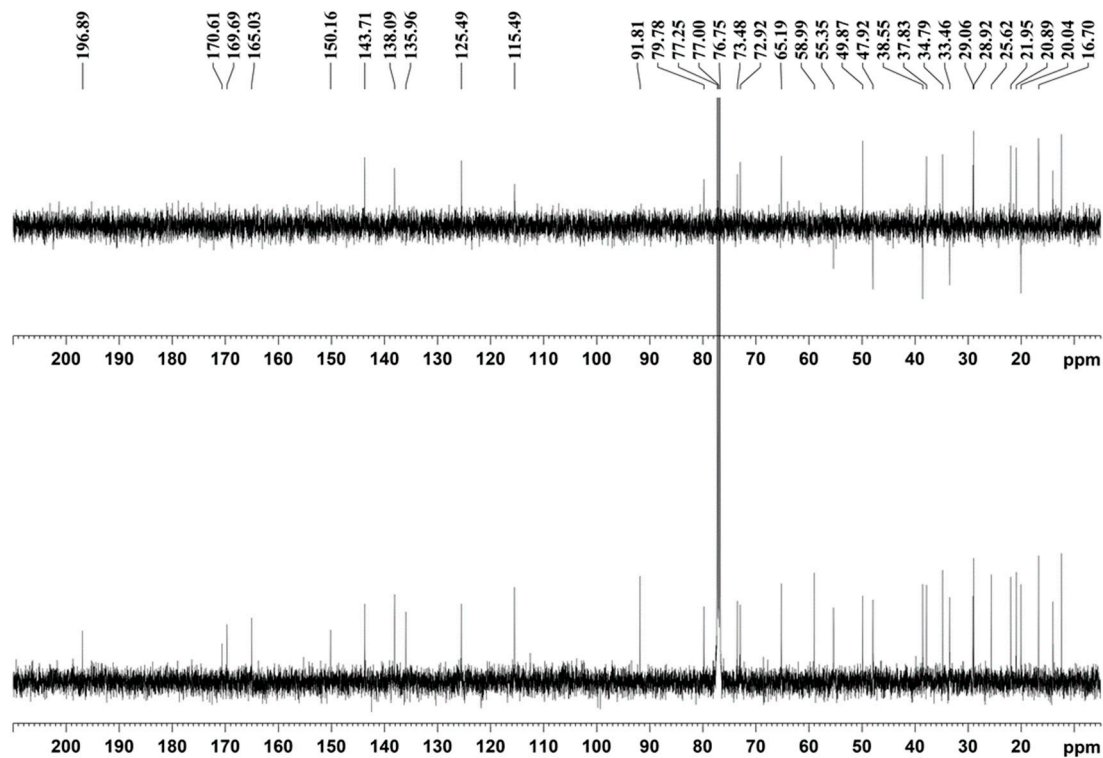

Figure S66.  $^{13}\text{C}$  NMR and DEPT spectrum of compound 7 in  $\text{CDCl}_3$

XSJ-QJZ-17 1H 1H COSY

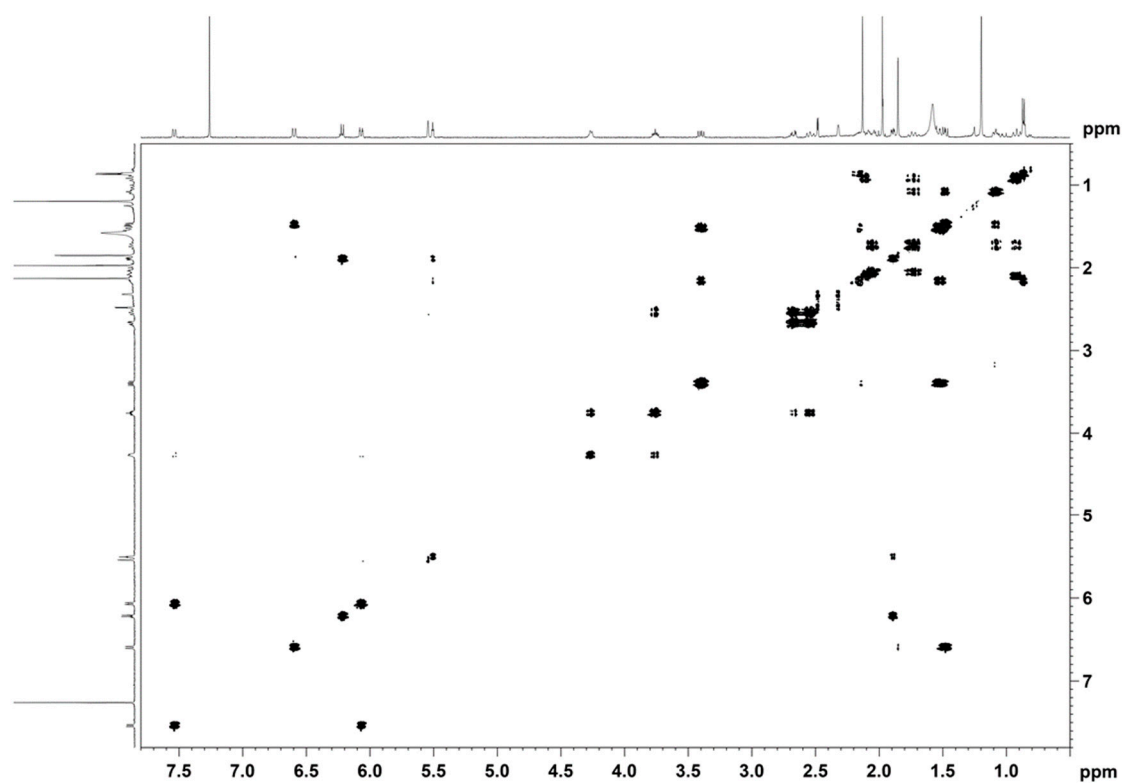

Figure S67.  $^1\text{H}$ - $^1\text{H}$  NMR spectrum of compound **7** in  $\text{CDCl}_3$

XSJ-QJZ-17 HMBC

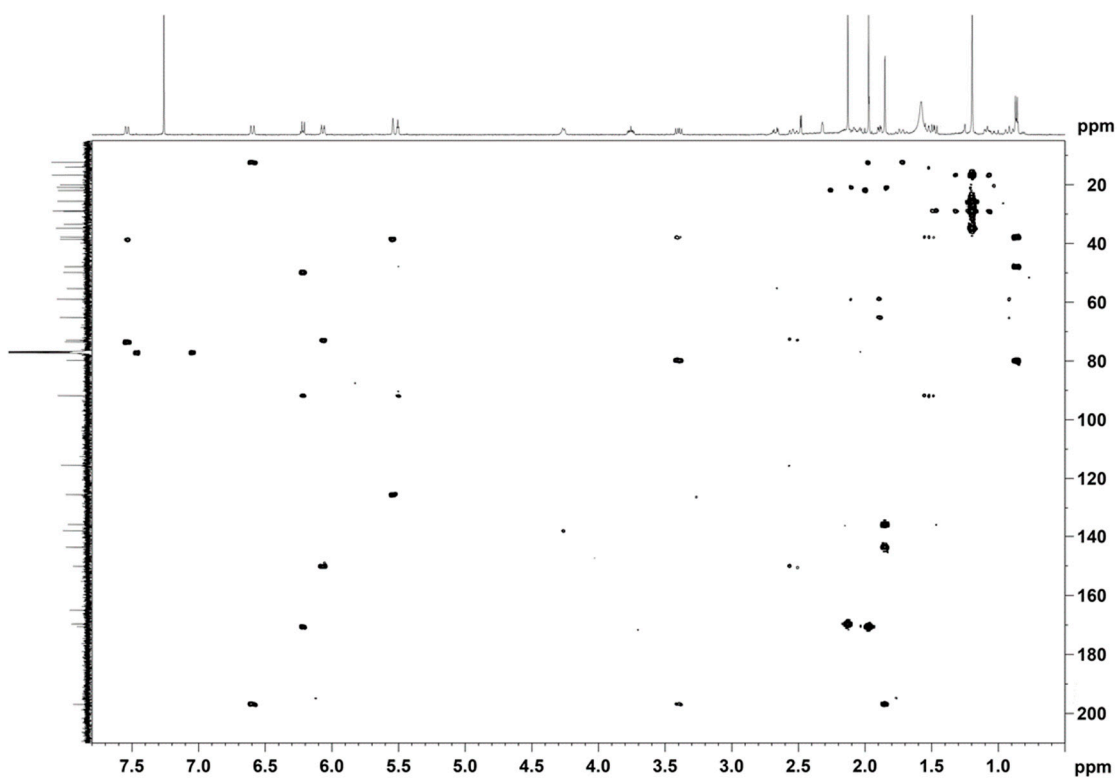

Figure S68. HMBC spectrum of compound **7** in  $\text{CDCl}_3$

XSJ-QJZ-17 HSQC

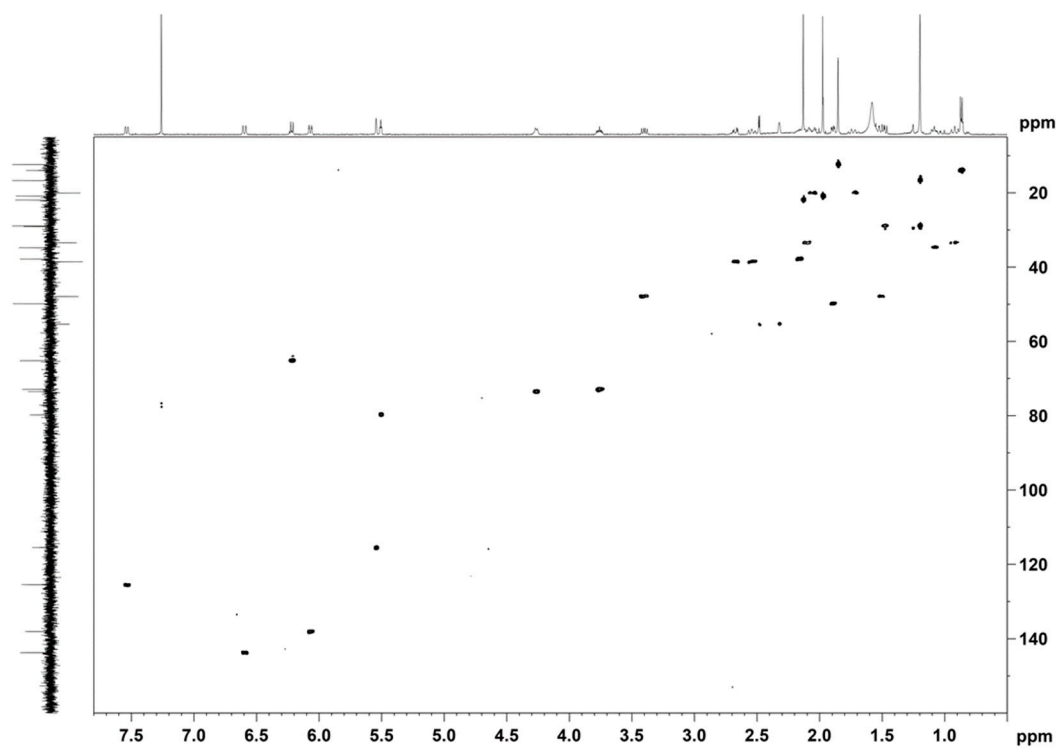

Figure S69. HSQC spectrum of compound **7** in CDCl<sub>3</sub>

XSJ-QJZ-17 NOESY

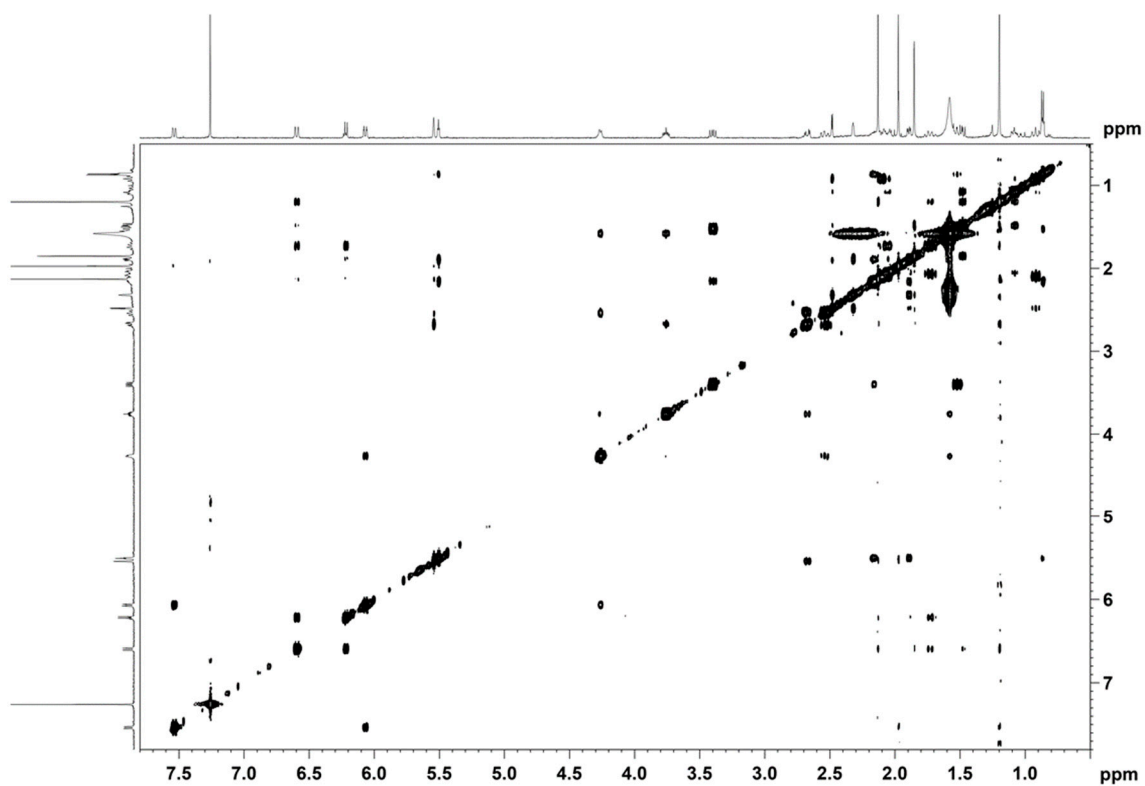

Figure S70. NOESY spectrum of compound **7** in CDCl<sub>3</sub>

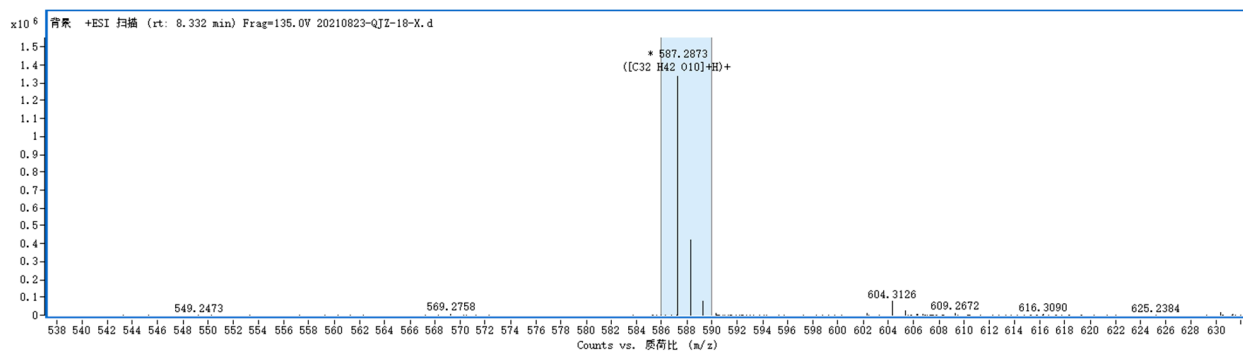

| Best | Formula(M)                                      | Ion Formula                                     | Tgt (m/z) | m/z      | Diff (ppm) |
|------|-------------------------------------------------|-------------------------------------------------|-----------|----------|------------|
| TRUE | C <sub>32</sub> H <sub>42</sub> O <sub>10</sub> | C <sub>32</sub> H <sub>43</sub> O <sub>10</sub> | 587.2851  | 587.2873 | 3.75       |

Figure S71. HR-ESI-MS spectrum of compound **8**

#### Rudolph Research Analytical

Saturday, 10/09/2021

This sample was measured on an Autopol VI, serial number 90079, manufactured by Rudolph Research Analytical, Hackettstown, NJ.

LotID : QJZ-18  
Set Temperature : 20.0  
Temp Corr : OFF

| n    | Average   | Std.Dev.    | Maximum | Minimum |          |     |        |       |       |         |
|------|-----------|-------------|---------|---------|----------|-----|--------|-------|-------|---------|
| 6    | 90.833    | 0.0000      | 90.833  | 90.833  |          |     |        |       |       |         |
| S.No | Sample ID | Time        | Result  | Scale   | OR ° Arc | WLG | Lg.mm  | Conc. | Temp. | Comment |
| 1    | QJZ-18    | 04:25:19 PM | 90.833  | SR      | 0.109    | 589 | 100.00 | 0.120 | 20.2  |         |
| 2    | QJZ-18    | 04:25:27 PM | 90.833  | SR      | 0.109    | 589 | 100.00 | 0.120 | 20.1  |         |
| 3    | QJZ-18    | 04:25:34 PM | 90.833  | SR      | 0.109    | 589 | 100.00 | 0.120 | 20.1  |         |
| 4    | QJZ-18    | 04:25:42 PM | 90.833  | SR      | 0.109    | 589 | 100.00 | 0.120 | 20.1  |         |
| 5    | QJZ-18    | 04:25:49 PM | 90.833  | SR      | 0.109    | 589 | 100.00 | 0.120 | 20.1  |         |
| 6    | QJZ-18    | 04:25:56 PM | 90.833  | SR      | 0.109    | 589 | 100.00 | 0.120 | 20.0  |         |

Signature

Figure S72. OR value of compound **8** in MeOH

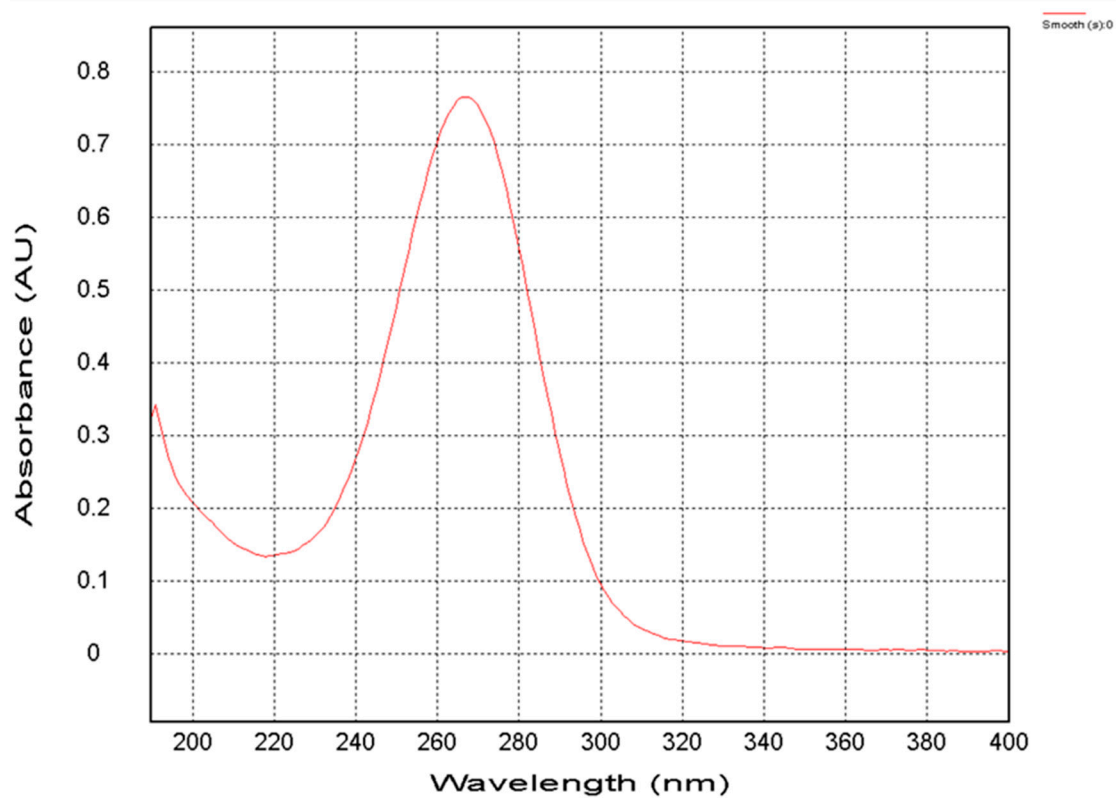

Figure S73. UV spectrum of compound **8** in MeOH

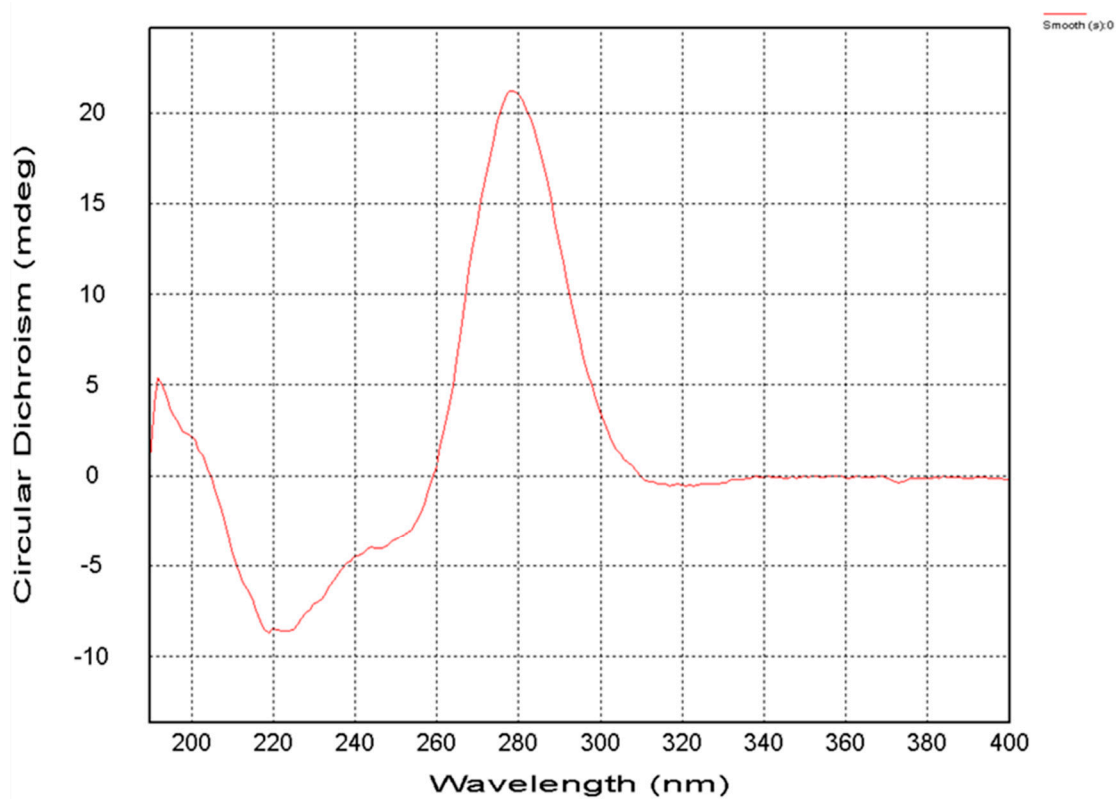

Figure S74. CD spectrum of compound **8** in MeOH

XSJ-QJZ-18 <sup>1</sup>H NMR (500 MHz, CDCl<sub>3</sub>)

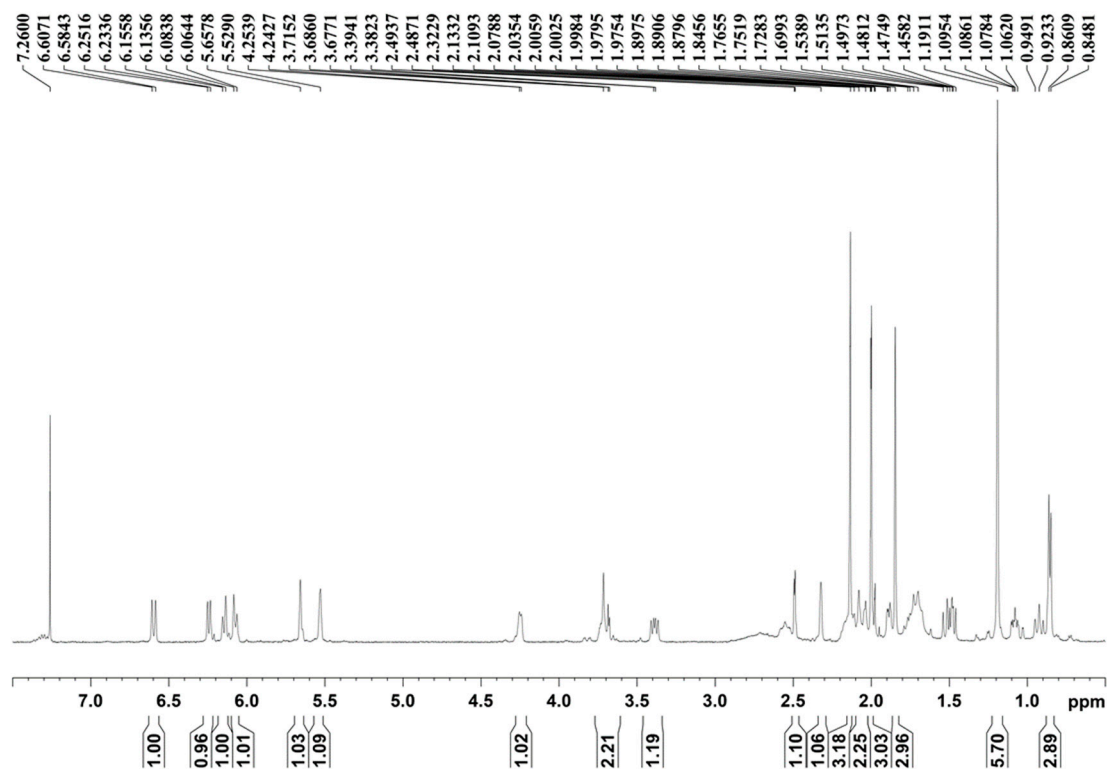

Figure S75. <sup>1</sup>H NMR spectrum of compound **8** in CDCl<sub>3</sub>

XSJ-QJZ-18 C13 and DEPT NMR (125 MHz, CDCl<sub>3</sub>)

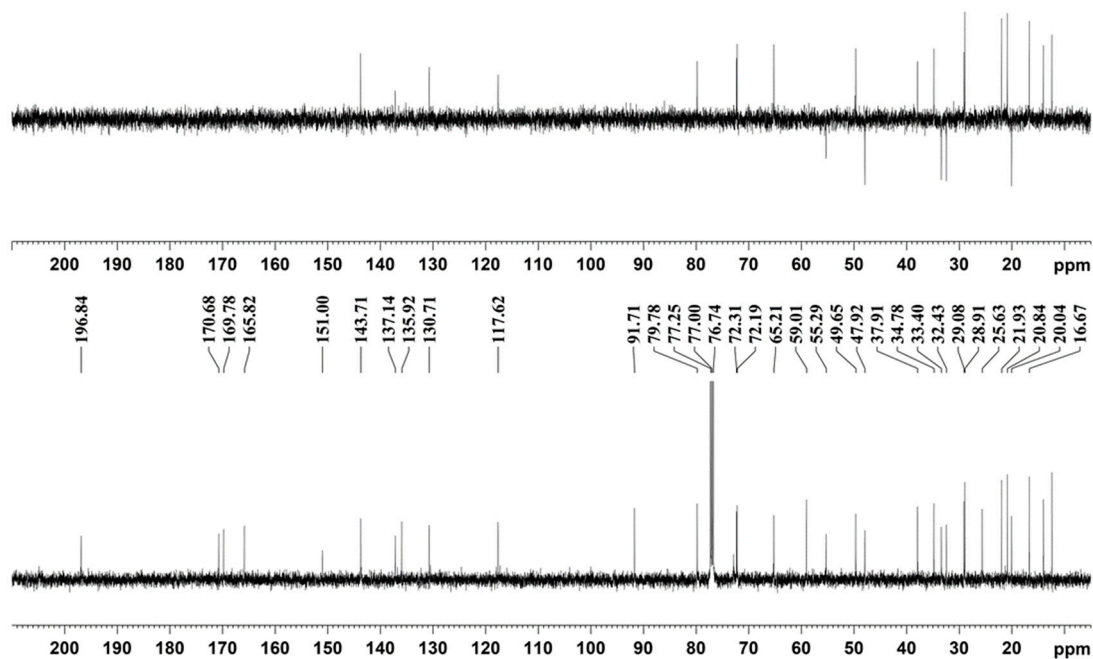

Figure S76. <sup>13</sup>C NMR and DEPT spectrum of compound **8** in CDCl<sub>3</sub>



XSJ-QJZ-18 1H 1H COSY

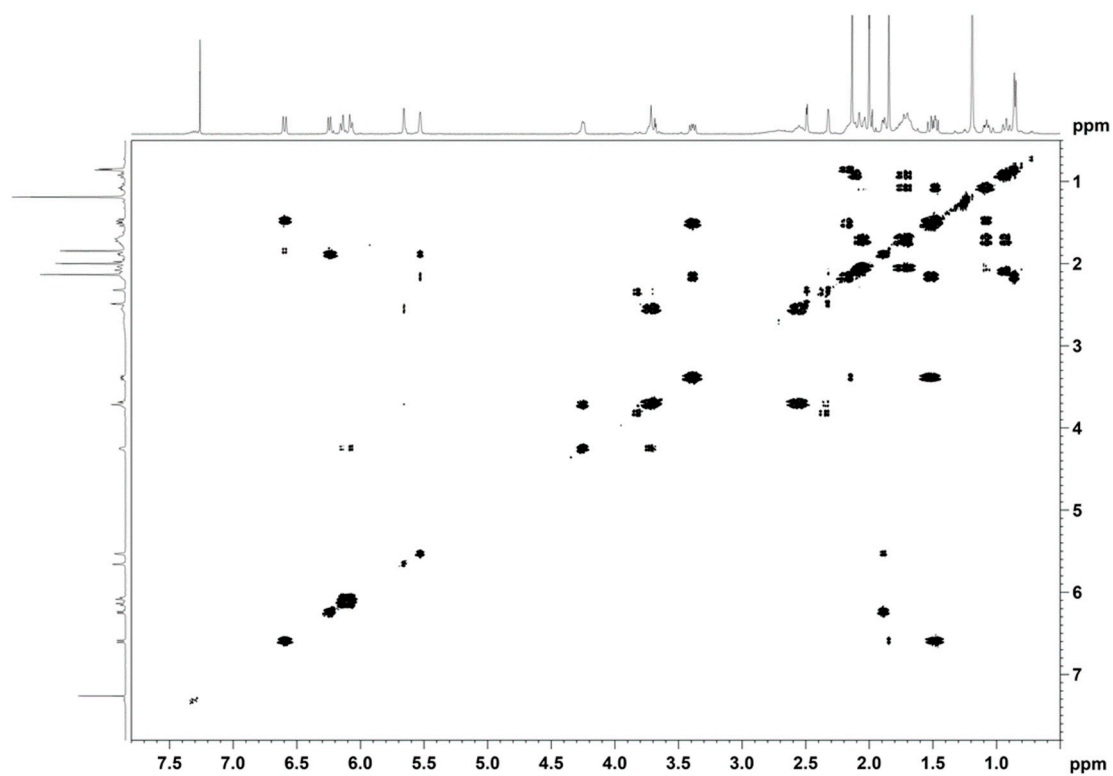

Figure S77. <sup>1</sup>H-<sup>1</sup>H NMR spectrum of compound **8** in CDCl<sub>3</sub>

XSJ-QJZ-18 HMBC

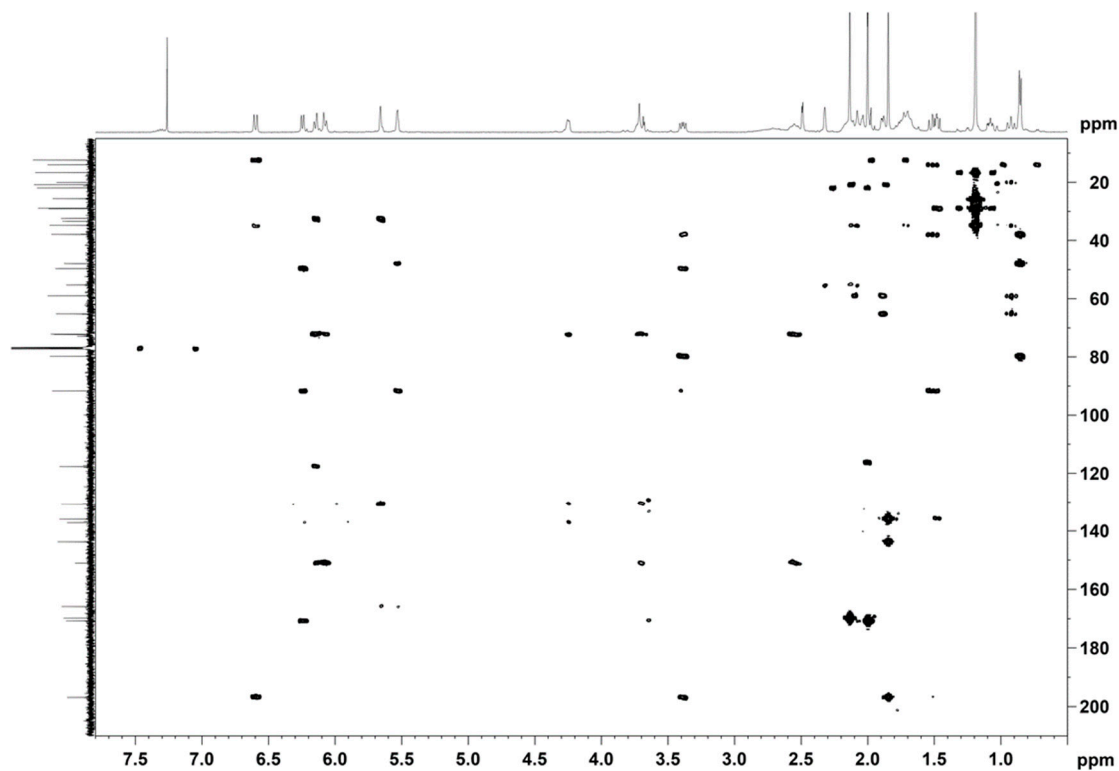

Figure S78. HMBC spectrum of compound **8** in CDCl<sub>3</sub>



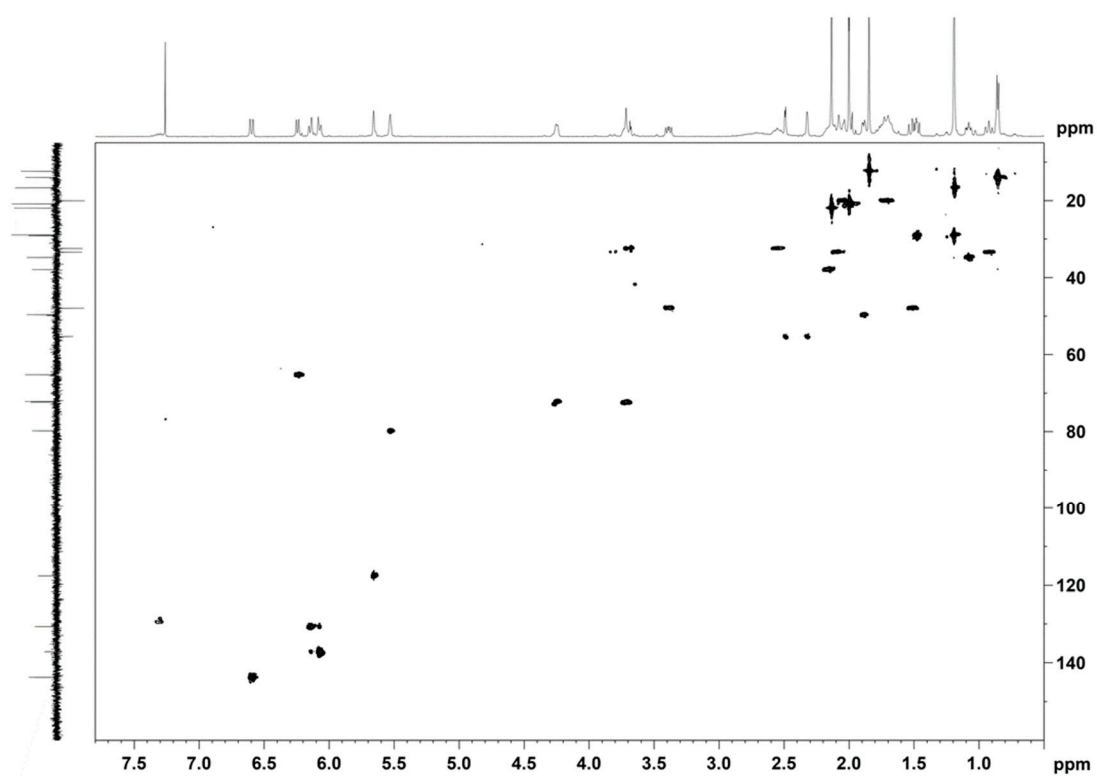

Figure S79. HSQC spectrum of compound **8** in CDCl<sub>3</sub>

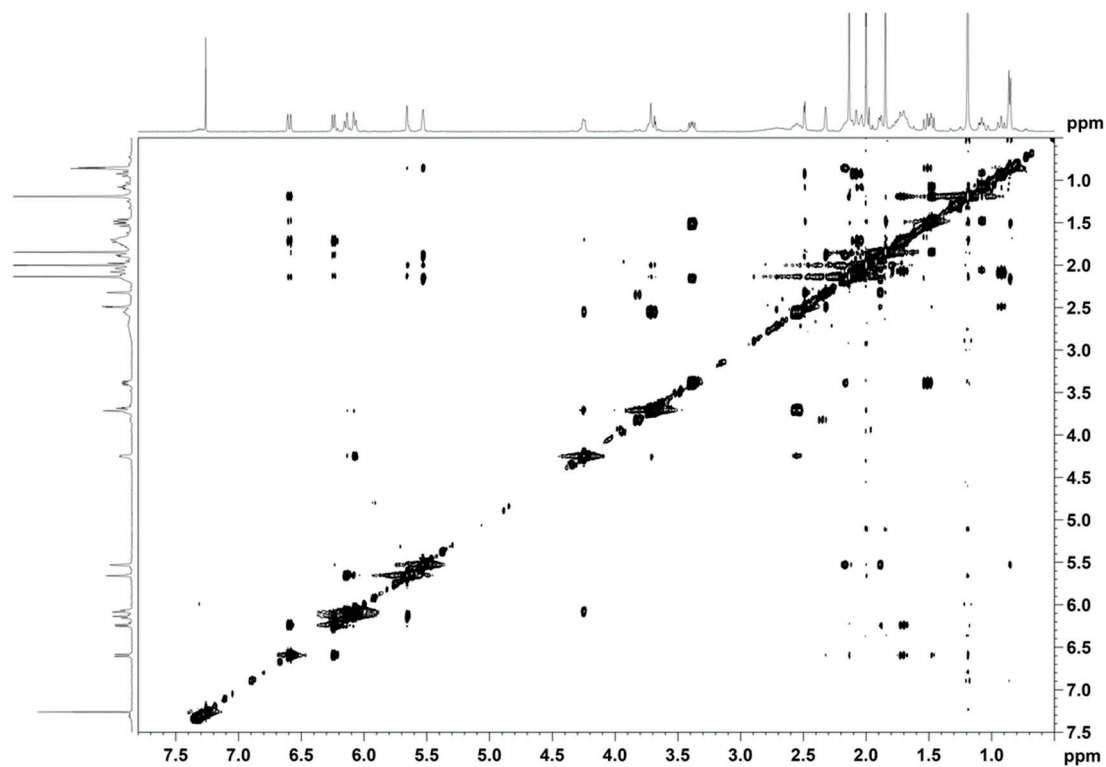

Figure S80. NOESY spectrum of compound **8** in CDCl<sub>3</sub>

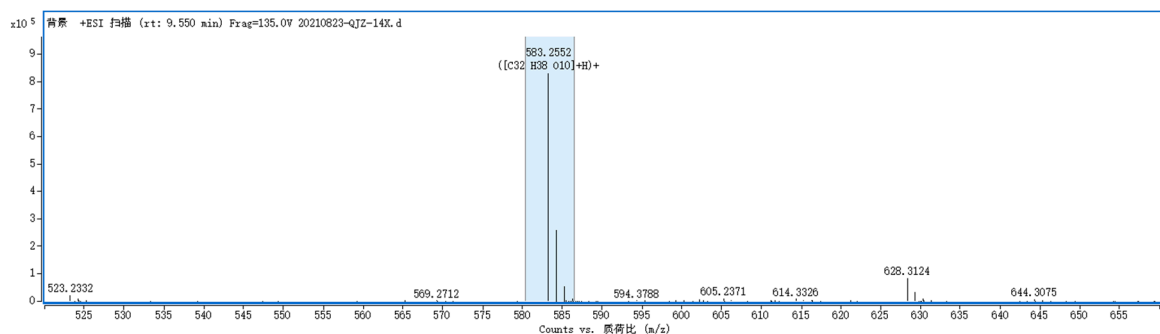

| Best | Formula(M)                                      | Ion Formula                                     | Tgt (m/z) | m/z      | Diff (ppm) |
|------|-------------------------------------------------|-------------------------------------------------|-----------|----------|------------|
| TRUE | C <sub>32</sub> H <sub>38</sub> O <sub>10</sub> | C <sub>32</sub> H <sub>39</sub> O <sub>10</sub> | 583.2538  | 583.2552 | 2.40       |

Figure S81. HRESIMS spectrum of compound **9**

#### Rudolph Research Analytical

Saturday, 10/09/2021

This sample was measured on an Autopol VI, serial number 90079, manufactured by Rudolph Research Analytical, Hackettstown, NJ.

LotID : QJZ-14  
Set Temperature : 20.0  
Temp Corr : OFF

| n    | Average   | Std.Dev.    | Maximum | Minimum |          |     |        |       |       |         |
|------|-----------|-------------|---------|---------|----------|-----|--------|-------|-------|---------|
| 6    | 77.778    | 0.3833      | 78.049  | 77.236  |          |     |        |       |       |         |
| S.No | Sample ID | Time        | Result  | Scale   | OR ° Arc | WLG | Lg.mm  | Conc. | Temp. | Comment |
| 1    | QJZ-14    | 04:47:14 PM | 77.236  | SR      | 0.095    | 589 | 100.00 | 0.123 | 20.1  |         |
| 2    | QJZ-14    | 04:47:22 PM | 78.049  | SR      | 0.096    | 589 | 100.00 | 0.123 | 20.1  |         |
| 3    | QJZ-14    | 04:47:29 PM | 77.236  | SR      | 0.095    | 589 | 100.00 | 0.123 | 20.1  |         |
| 4    | QJZ-14    | 04:47:37 PM | 78.049  | SR      | 0.096    | 589 | 100.00 | 0.123 | 20.0  |         |
| 5    | QJZ-14    | 04:47:45 PM | 78.049  | SR      | 0.096    | 589 | 100.00 | 0.123 | 20.0  |         |
| 6    | QJZ-14    | 04:47:52 PM | 78.049  | SR      | 0.096    | 589 | 100.00 | 0.123 | 20.0  |         |

Signature

Figure S82. OR value of compound **9** in MeOH

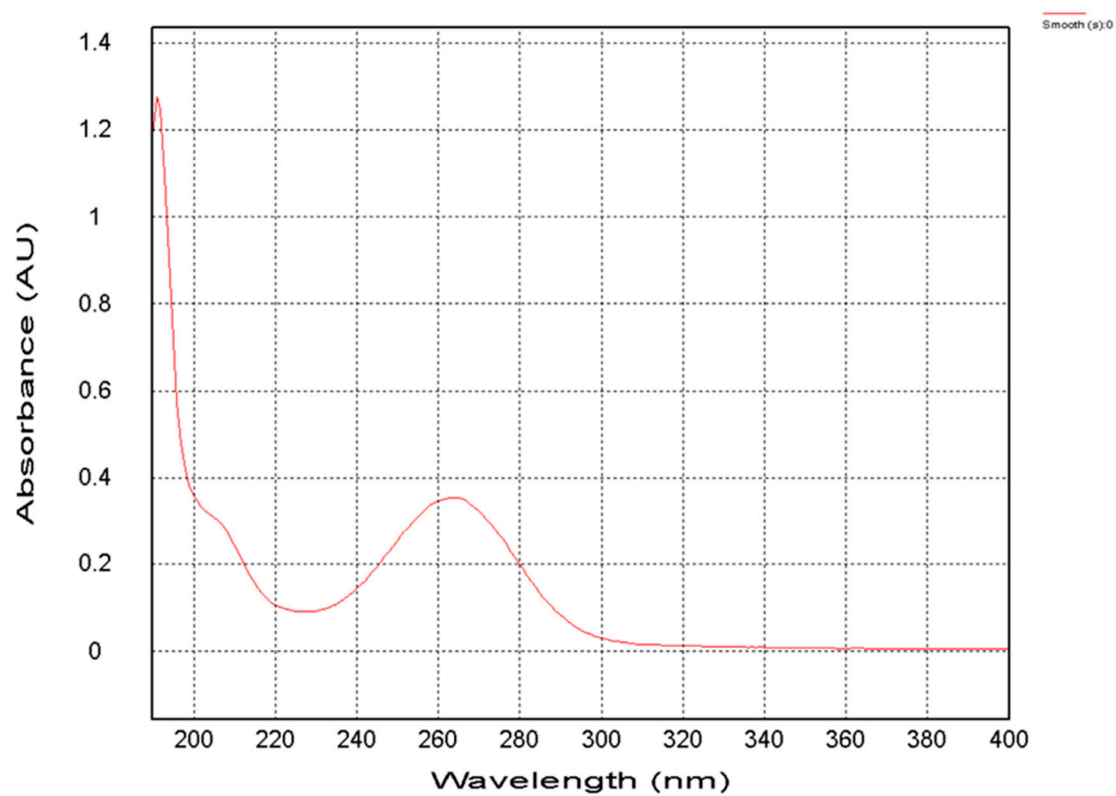

Figure S83. UV spectrum of compound **9** in MeOH

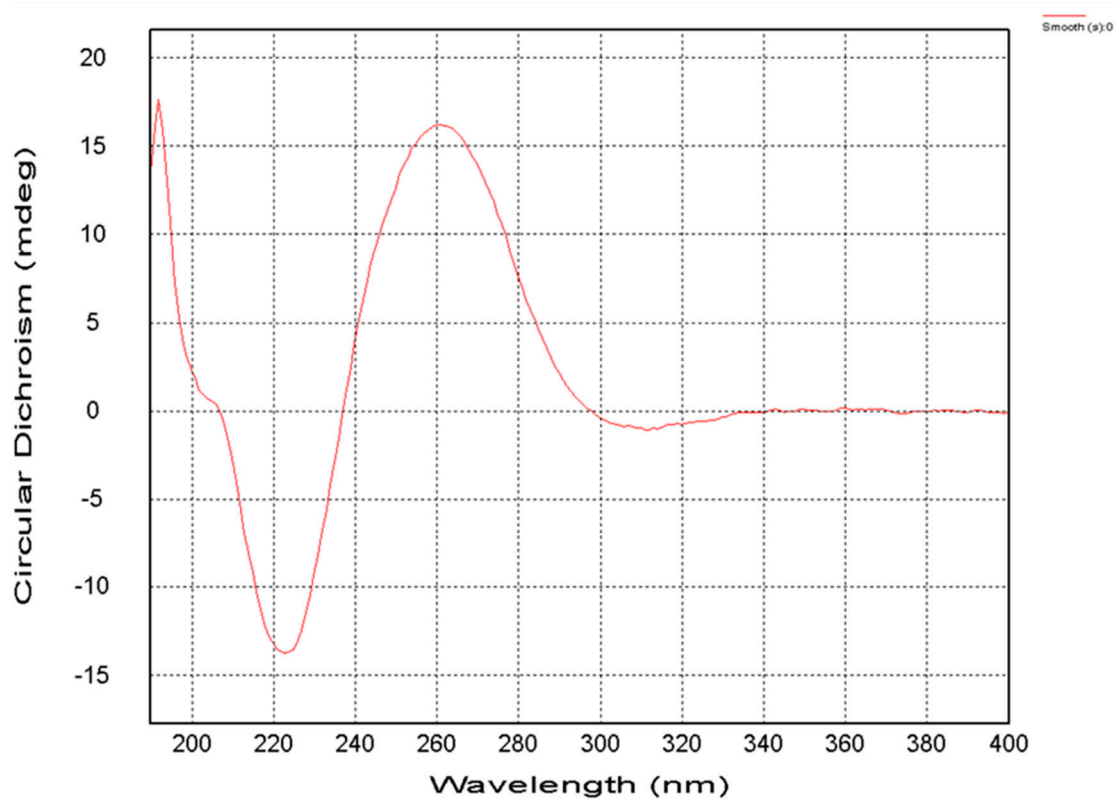

Figure S84. CD spectrum of compound **9** in MeOH

XSJ-QJZ-14  $^1\text{H}$  NMR (500 MHz,  $\text{CDCl}_3$ )

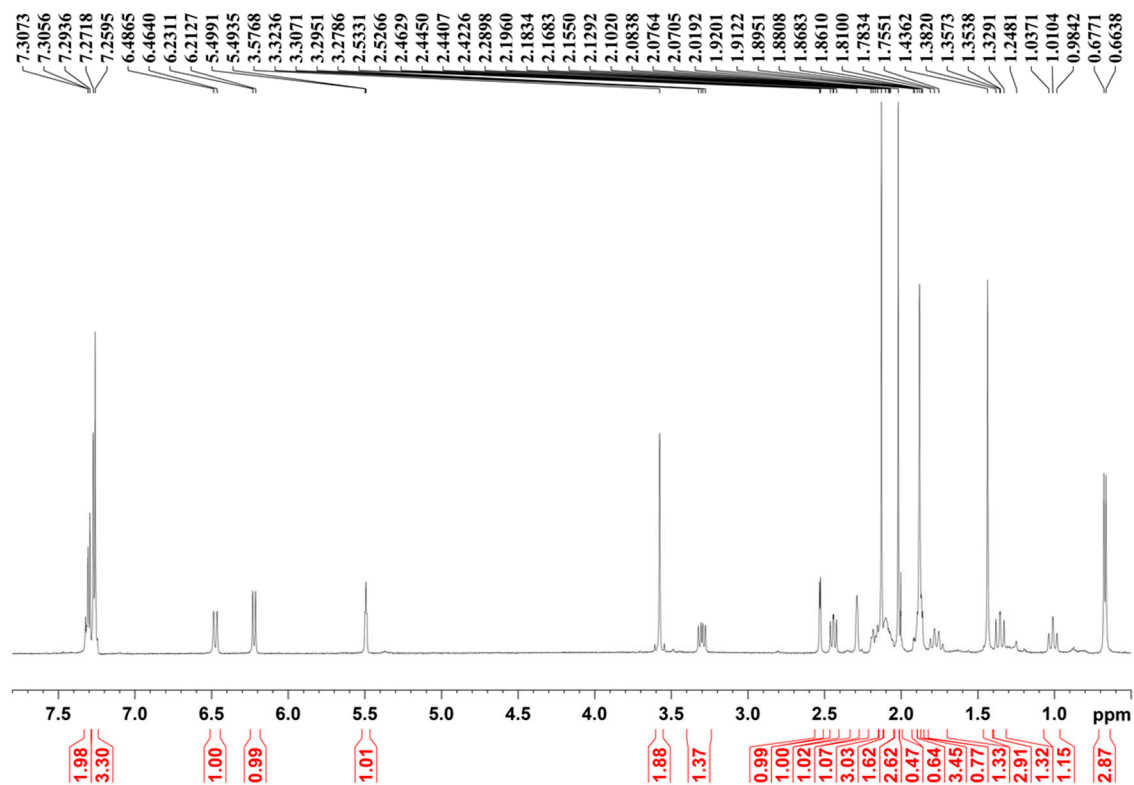

Figure S85.  $^1\text{H}$  NMR spectrum of compound **9** in  $\text{CDCl}_3$

XSJ-QJZ-14  $^{13}\text{C}$  and DEPT NMR (125 MHz,  $\text{CDCl}_3$ )

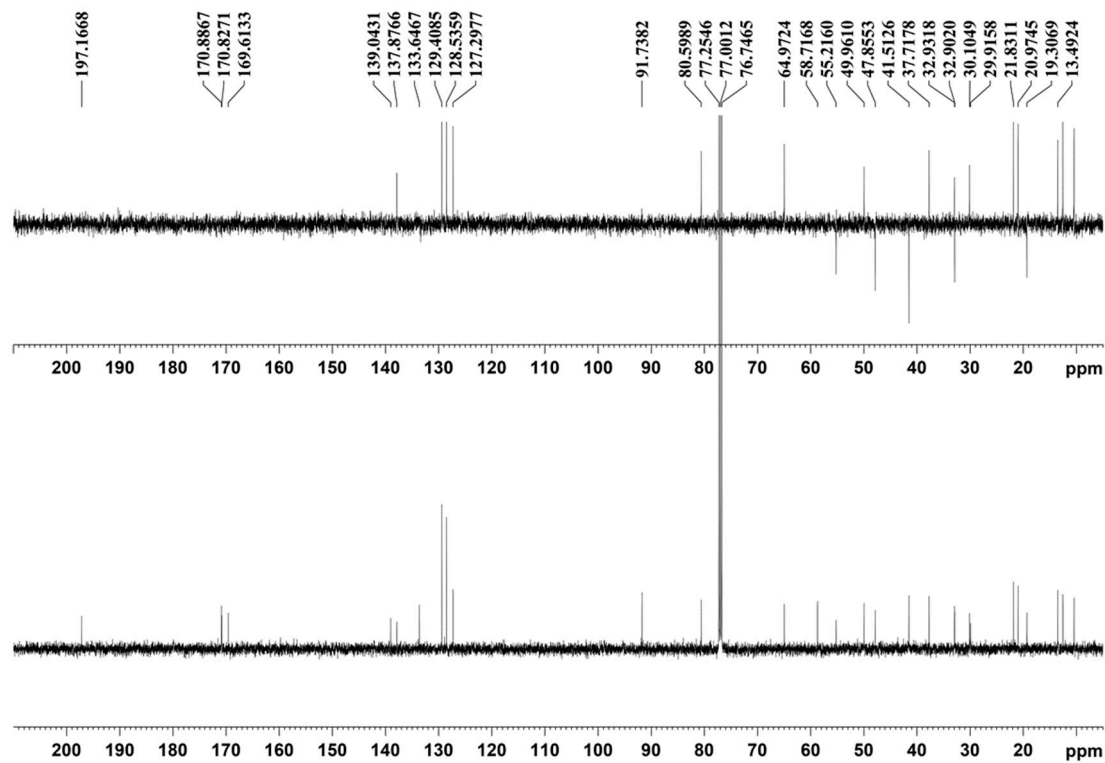

Figure S86.  $^{13}\text{C}$  NMR and DEPT spectrum of compound **9** in  $\text{CDCl}_3$
